# Supplementary material for: Biocide Susceptibility and Antimicrobial Resistance of Escherichia coli Isolated from Swine Feces, Pork Meat and Humans in Germany
Source: MDPI journal article supplement (doi:10.3390/antibiotics12050823), 2023-04-27
Supplement: s1 [file s1]

**Table S3a.** Minimum inhibitory concentrations of biocides in non-ESBL and ESBL *E. coli* isolates.

| Biocide | Resistance | 0.25 | 0.5 | 1  | 2   | 4  | 8 | 16 |
|---------|------------|------|-----|----|-----|----|---|----|
|         |            |      |     |    |     |    |   |    |
| GDA     | ESBL       |      |     |    |     |    |   |    |
|         | non-ESBL   |      |     |    |     |    |   |    |
| CHG     | ESBL       |      | 3   | 41 | 153 | 13 | 4 | 2  |
|         | non-ESBL   |      | 4   | 40 | 122 | 10 | 1 | -  |
| BAC     | ESBL       |      |     |    | -   | -  | 1 | 63 |
|         | non-ESBL   |      |     |    | -   | -  | 3 | 42 |
| OCT     | ESBL       | -    | -   | 5  | 209 | 2  | - | -  |
|         | non-ESBL   | -    | -   | 2  | 169 | 6  | - | -  |
| IPA     | ESBL       |      |     |    |     |    |   |    |
|         | non-ESBL   |      |     |    |     |    |   |    |
| NaOCl   | ESBL       |      |     |    |     |    |   |    |
|         | non-ESBL   |      |     |    |     |    |   |    |
| PCMC    | ESBL       |      |     |    |     |    |   |    |
|         | non-ESBL   |      |     |    |     |    |   |    |

GDA=glutaraldehyde; CHG=chlorhexidine digluconate; BAC=benzalkonium chloride; OCT=octenidine dihydrochloride; IPA=isopropanol

MIC=minimum inhibitory concentration. MIC<sub>95</sub>=The lowest concentration inhibiting growth of 95% of the bacterial population.

ESBL=extended-spectrum beta-lactamase-producing *E. coli*

Differences were considered significant at  $p < 0.05$ .

| Number of isolates with MIC values (mg/L) of |    |     |     |     |      |      |      |      |
|----------------------------------------------|----|-----|-----|-----|------|------|------|------|
| 32                                           | 64 | 128 | 256 | 512 | 1024 | 2048 | 4096 | 8192 |
|                                              | -  | -   | 25  | 174 | 16   | 1    | -    | -    |
|                                              | -  | -   | 27  | 144 | 6    | -    | -    | -    |
| -                                            | -  |     |     |     |      |      |      |      |
| -                                            | -  |     |     |     |      |      |      |      |
| 135                                          | 16 | 1   | -   |     |      |      |      |      |
| 129                                          | 3  | -   | -   |     |      |      |      |      |
| -                                            |    |     |     |     |      |      |      |      |
| -                                            |    |     |     |     |      |      |      |      |
|                                              |    |     |     |     |      | -    | -    | -    |
|                                              |    |     |     |     |      |      |      |      |
| -                                            | -  | 39  | 173 | 4   | -    |      |      |      |
| -                                            | -  | 27  | 141 | 9   | -    | -    |      |      |
| -                                            | 2  | 166 | 48  | -   | -    | -    | -    | -    |
| -                                            | 1  | 113 | 62  | 1   | -    | -    | -    | -    |

anol; NaOCl=sodium hypochlorite; PCMC=chlorocresol.

| 16384 | 32768 | 65536 | 131072 | 262144 | MIC <sub>95</sub> | <i>p</i> -value |
|-------|-------|-------|--------|--------|-------------------|-----------------|
|       |       |       |        |        | 1024              | 0.066           |
|       |       |       |        |        | 512               |                 |
|       |       |       |        |        | 4                 | 0.176           |
|       |       |       |        |        | 4                 |                 |
|       |       |       |        |        | 64                | 0.858           |
|       |       |       |        |        | 32                |                 |
|       |       |       |        |        | 2                 | 0.066           |
|       |       |       |        |        | 2                 |                 |
| 7     | 115   | 90    | 4      | -      | 65536             | 0.186           |
| 4     | 85    | 83    | 5      | -      | 65536             |                 |
|       |       |       |        |        | 512               | 0.186           |
|       |       |       |        |        | 1024              |                 |
|       |       |       |        |        | 512               | 0.003           |
|       |       |       |        |        | 512               |                 |

**Table S3b.** Minimum bactericidal concentrations of biocides in non-ESBL and ESBL *E. coli* isolates.

| Biocide | Resistance | 0.25 | 0.5 | 1  | 2   | 4  | 8  | 16 |
|---------|------------|------|-----|----|-----|----|----|----|
|         |            |      |     |    |     |    |    |    |
| GDA     | ESBL       |      |     |    |     |    |    |    |
|         | non-ESBL   |      |     |    |     |    |    |    |
| CHG     | ESBL       |      | 2   | 34 | 134 | 32 | 12 | 2  |
|         | non-ESBL   |      | 4   | 39 | 107 | 24 | 1  | 1  |
| BAC     | ESBL       |      |     |    | -   | -  | -  | 38 |
|         | non-ESBL   |      |     |    | -   | -  | 2  | 27 |
| OCT     | ESBL       | -    | -   | 3  | 184 | 22 | 7  | -  |
|         | non-ESBL   | -    | -   | 1  | 144 | 21 | 11 | -  |
| IPA     | ESBL       |      |     |    |     |    |    |    |
|         | non-ESBL   |      |     |    |     |    |    |    |
| NaOCl   | ESBL       |      |     |    |     |    |    |    |
|         | non-ESBL   |      |     |    |     |    |    |    |
| PCMC    | ESBL       |      |     |    |     |    |    |    |
|         | non-ESBL   |      |     |    |     |    |    |    |

GDA=glutaraldehyde; CHG=chlorhexidine digluconate; BAC=benzalkonium chloride; OCT=octenidine dihydrochloride; IPA=iso  
MBC=minimum bactericidal concentration. MBC<sub>95</sub>=lowest lethal concentration killing 95% of the bacterial population.

ESBL=extended-spectrum beta-lactamase-producing *E. coli*

Differences were considered significant at  $p < 0.05$ .

| Number of isolates with MBC values (mg/L) of |    |     |     |     |      |      |      |      |
|----------------------------------------------|----|-----|-----|-----|------|------|------|------|
| 32                                           | 64 | 128 | 256 | 512 | 1024 | 2048 | 4096 | 8192 |
|                                              | -  | -   | 14  | 173 | 27   | 2    | -    | -    |
|                                              | -  | -   | 15  | 150 | 12   | -    | -    | -    |
| -                                            | -  |     |     |     |      |      |      |      |
| 1                                            | -  |     |     |     |      |      |      |      |
| 139                                          | 37 | 2   | -   |     |      |      |      |      |
| 118                                          | 28 | 2   | -   |     |      |      |      |      |
| -                                            |    |     |     |     |      |      |      |      |
| -                                            |    |     |     |     |      |      |      |      |
|                                              |    |     |     |     |      | -    | -    | -    |
|                                              |    |     |     |     |      | -    | -    | -    |
|                                              | -  | -   | 3   | 187 | 25   | 1    | -    |      |
|                                              | -  | -   | 2   | 154 | 20   | 1    | -    |      |
|                                              | -  | -   | 1   | 205 | 10   | -    | -    | -    |
|                                              | -  | 1   | 4   | 160 | 12   | -    | -    | -    |

propanol; NaOCl=sodium hypochlorite; PCMC=chlorocresol.

| 16384 | 32768 | 65536 | 131072 | 262144 | MBC <sub>95</sub> | <i>p</i> -value |
|-------|-------|-------|--------|--------|-------------------|-----------------|
|       |       |       |        |        | 1024              | 0.040           |
|       |       |       |        |        | 1024              |                 |
|       |       |       |        |        | 8                 | 0.021           |
|       |       |       |        |        | 4                 |                 |
|       |       |       |        |        | 64                | 0.988           |
|       |       |       |        |        | 64                |                 |
|       |       |       |        |        | 4                 | 0.143           |
|       |       |       |        |        | 8                 |                 |
| 1     | 13    | 38    | 148    | 15     | 262144            | 0.153           |
| -     | 3     | 30    | 131    | 13     | 262144            |                 |
|       |       |       |        |        | 1024              | 0.984           |
|       |       |       |        |        | 1024              |                 |
|       |       |       |        |        | 512               | 0.965           |
|       |       |       |        |        | 1024              |                 |
