# Supplementary material for: Biocide Susceptibility and Antimicrobial Resistance of Escherichia coli Isolated from Swine Feces, Pork Meat and Humans in Germany
Source: MDPI journal article supplement (doi:10.3390/antibiotics12050823), 2023-04-27
Supplement: s1 [file s1]

**Table S5a.** Significant positive correlation coefficients ( $r_s$ ) between biocides and antimicrobials in *E. coli* of hur

| Origin of isolates | $r_s$ | GDA <sub>MIC</sub> | GDA <sub>MBC</sub> | CHG <sub>MIC</sub> | CHG <sub>MBC</sub> | BAC <sub>MIC</sub> | BAC <sub>MBC</sub> |
|--------------------|-------|--------------------|--------------------|--------------------|--------------------|--------------------|--------------------|
| Swine feces        | AZI   | -                  | -                  | 0.289**            | -                  | -                  | -                  |
|                    | GEN   | 0.246*             | -                  | -                  | -                  | -                  | -                  |
|                    | TET   | -                  | -                  | 0.291**            | 0.276**            | -                  | -                  |
| Pork meat          | TET   | -                  | -                  | -                  | 0.344**            | -                  | -                  |
|                    | COL   | -                  | -                  | 0.212*             | 0.201*             | -                  | -                  |
|                    | NAL   | -                  | -                  | 0.225*             | 0.245*             | -                  | -                  |
|                    | CTZ   | -                  | -                  | 0.370**            | 0.228*             | -                  | -                  |
| Voluntary donors   | AMP   | -                  | -                  | -                  | -                  | 0.216*             | 0.301**            |
|                    | AZI   | -                  | -                  | -                  | -                  | 0.311**            | 0.247*             |
|                    | CHL   | -                  | -                  | 0.284**            | -                  | 0.297**            | 0.317**            |
|                    | CIP   | -                  | -                  | -                  | -                  | 0.274**            | 0.238*             |
|                    | COL   | -                  | -                  | -                  | -                  | -                  | -                  |
|                    | CTA   | -                  | -                  | -                  | -                  | 0.230*             | 0.327**            |
|                    | MER   | -                  | -                  | -                  | -                  | -                  | 0.202*             |
|                    | GEN   | -                  | -                  | 0.212*             | -                  | -                  | -                  |
|                    | NAL   | -                  | -                  | -                  | -                  | 0.215*             | 0.213*             |
|                    | SME   | -                  | -                  | -                  | -                  | 0.216*             | 0.213*             |
|                    | CTZ   | -                  | -                  | -                  | -                  | 0.312**            | 0.376**            |
|                    | TET   | -                  | -                  | 0.219*             | 0.310**            | -                  | -                  |
|                    | TIG   | -                  | -                  | -                  | -                  | 0.264**            | 0.259*             |
|                    | TRI   | -                  | -                  | -                  | -                  | -                  | 0.228*             |
| Inpatients         | AMP   | -                  | -                  | -                  | -                  | -                  | -                  |
|                    | CHL   | -                  | -                  | -                  | -                  | -                  | -                  |
|                    | CIP   | -                  | -                  | -                  | 0.224*             | 0.202*             | -                  |
|                    | NAL   | -                  | -                  | -                  | 0.302**            | 0.208*             | -                  |
|                    | TET   | -                  | -                  | -                  | -                  | 0.205*             | -                  |
|                    | COL   | -                  | -                  | -                  | -                  | -                  | -                  |
|                    | AZI   | -                  | -                  | -                  | 0.213*             | -                  | -                  |
|                    | CTA   | -                  | -                  | -                  | -                  | -                  | -                  |

**Table S5b.** Significant positive correlation coefficients ( $r_s$ ) between biocides and antimicrobials in non-ESBL an

| Origin of isolates | $r_s$ | GDA <sub>MIC</sub> | GDA <sub>MBC</sub> | CHG <sub>MIC</sub> | CHG <sub>MBC</sub> | BAC <sub>MIC</sub> | BAC <sub>MBC</sub> |
|--------------------|-------|--------------------|--------------------|--------------------|--------------------|--------------------|--------------------|
| ESBL               | AZI   | -                  | -                  | 0.165*             | 0.165*             | 0.140*             | 0.162*             |
|                    | CIP   | -                  | -                  | 0.201**            | 0.259**            | 0.187**            | -                  |
|                    | MER   | 0.160*             | 0.141*             | -                  | -                  | -                  | -                  |
|                    | NAL   | -                  | -                  | 0.193**            | 0.254**            | 0.201**            | -                  |
|                    | TET   | -                  | -                  | 0.180**            | 0.196**            | -                  | -                  |
|                    | TIG   | -                  | -                  | -                  | -                  | -                  | 0.174*             |
|                    | GEN   | -                  | -                  | 0.161*             | -                  | 0.161*             | -                  |
|                    | CTZ   | -                  | -                  | -                  | -                  | 0.194**            | -                  |
|                    | CHL   | -                  | -                  | -                  | -                  | -                  | -                  |
| non-ESBL           | AMP   | -                  | -                  | -                  | -                  | 0.227**            | 0.181*             |
|                    | AZI   | -                  | -                  | -                  | -                  | 0.231**            | -                  |
|                    | CIP   | 0.154*             | -                  | 0.168*             | 0.227**            | -                  | -                  |
|                    | GEN   | 0.185*             | -                  | 0.286**            | 0.222**            | -                  | -                  |
|                    | NAL   | -                  | -                  | 0.161*             | 0.251**            | -                  | -                  |
|                    | SME   | -                  | -                  | -                  | -                  | 0.181*             | 0.173*             |
|                    | CTZ   | -                  | -                  | -                  | -                  | 0.228**            | 0.307**            |
|                    | TET   | -                  | -                  | 0.233**            | 0.249**            | -                  | -                  |
|                    | TMP   | -                  | -                  | -                  | -                  | 0.208**            | 0.219**            |
|                    | CTA   | -                  | -                  | -                  | -                  | -                  | -                  |

GDA=glutaraldehyde; CHG=chlorhexidine digluconate; BAC=benzalkonium chloride; OCT=octenidine dihydrochloride; IPA=isopropanol;

AMP=ampicillin; CTA=cefotaxime; CTZ=ceftazidime; MER=meropenem; NAL=nalidixic acid; CIP=ciprofloxacin; GEN=gentamicin; TET= tet

MIC=minimum inhibitory concentration; MBC=minimum bactericidal concentration

\* Correlation is significant at the 0.05 level; \*\* Correlation is significant at the 0.01 level.

nan and porcine origin.

[illegible]d ESBL *E. coli*

| OCT <sub>MIC</sub> | OCT <sub>MBC</sub> | IPA <sub>MIC</sub> | IPA <sub>MBC</sub> | PCMC <sub>MIC</sub> | PCMC <sub>MBC</sub> | NaOCl <sub>MIC</sub> | NaOCl <sub>MBC</sub> |
|--------------------|--------------------|--------------------|--------------------|---------------------|---------------------|----------------------|----------------------|
| -                  | -                  | -                  | -                  | -                   | -                   | -                    | -                    |
| -                  | -                  | -                  | -                  | -                   | -                   | -                    | -                    |
| -                  | -                  | -                  | -                  | -                   | -                   | -                    | -                    |
| -                  | -                  | -                  | -                  | -                   | -                   | -                    | -                    |
| -                  | -                  | -                  | -                  | -                   | -                   | -                    | -                    |
| -                  | -                  | 0.157*             | -                  | -                   | -                   | -                    | -                    |
| -                  | -                  | -                  | -                  | -                   | -                   | -                    | -                    |
| -                  | -                  | -                  | -                  | 0.165*              | -                   | -                    | -                    |
| -                  | -                  | -                  | -                  | -                   | -                   | -                    | -                    |
| -                  | -                  | -                  | -                  | -                   | -                   | -                    | -                    |
| -                  | -                  | -                  | -                  | -                   | -                   | -                    | -                    |
| -                  | -                  | -                  | -                  | -                   | -                   | -                    | -                    |
| -                  | -                  | -                  | -                  | -                   | -                   | -                    | -                    |
| -                  | -                  | -                  | -                  | -                   | -                   | -                    | -                    |
| -                  | -                  | -                  | -                  | -                   | -                   | -                    | -                    |
| -                  | -                  | -                  | -                  | -                   | -                   | -                    | -                    |
| -                  | -                  | -                  | -                  | -                   | -                   | -                    | -                    |
| -                  | -                  | -                  | -                  | -                   | -                   | -                    | -                    |
| -                  | -                  | -                  | 0.155*             | -                   | -                   | -                    | -                    |

NaOCl=sodium hypochlorite; PCMC=chlorocresol.

tracycline; TIG=tigecycline; COL=colistin; SME=sulfamethoxazole; TRI=trimethoprim; CHL=chloramphenicol; AZI=azithromycin.
