# Supplementary material for: Biocide Susceptibility and Antimicrobial Resistance of Escherichia coli Isolated from Swine Feces, Pork Meat and Humans in Germany
Source: MDPI journal article supplement (doi:10.3390/antibiotics12050823), 2023-04-27
Supplement: s1 [file s1]

**Table S1.** Biocide susceptibility of 393 *E. coli*.

| BfR-ID    | Origin of isolates | Resistance | MIC (mg/L) |      |      |     |          |
|-----------|--------------------|------------|------------|------|------|-----|----------|
|           |                    |            | GDA        | CHG  | BAC  | OCT | IPA      |
| 18-47-134 | Voluntary donor    | ESBL       | 512.0      | 2.0  | 32.0 | 2.0 | 32768.0  |
| 18-47-135 | Voluntary donor    | ESBL       | 256.0      | 2.0  | 32.0 | 2.0 | 65536.0  |
| 18-47-136 | Voluntary donor    | ESBL       | 512.0      | 2.0  | 32.0 | 2.0 | 32768.0  |
| 18-47-137 | Voluntary donor    | ESBL       | 256.0      | 1.0  | 32.0 | 2.0 | 32768.0  |
| 18-47-138 | Voluntary donor    | ESBL       | 512.0      | 2.0  | 32.0 | 2.0 | 65536.0  |
| 18-47-139 | Voluntary donor    | ESBL       | 512.0      | 4.0  | 32.0 | 2.0 | 32768.0  |
| 18-47-140 | Voluntary donor    | ESBL       | 512.0      | 1.0  | 32.0 | 2.0 | 65536.0  |
| 18-47-141 | Voluntary donor    | ESBL       | 512.0      | 2.0  | 32.0 | 2.0 | 32768.0  |
| 18-47-142 | Voluntary donor    | ESBL       | 512.0      | 8.0  | 32.0 | 2.0 | 32768.0  |
| 18-47-143 | Voluntary donor    | ESBL       | 512.0      | 2.0  | 32.0 | 2.0 | 32768.0  |
| 18-47-144 | Voluntary donor    | ESBL       | 512.0      | 2.0  | 8.0  | 2.0 | 32768.0  |
| 18-47-150 | Voluntary donor    | ESBL       | 512.0      | 16.0 | 64.0 | 2.0 | 32768.0  |
| 18-47-151 | Voluntary donor    | ESBL       | 512.0      | 2.0  | 32.0 | 2.0 | 32768.0  |
| 18-47-152 | Voluntary donor    | ESBL       | 512.0      | 2.0  | 32.0 | 2.0 | 65536.0  |
| 18-47-154 | Voluntary donor    | ESBL       | 512.0      | 4.0  | 32.0 | 2.0 | 16384.0  |
| 18-47-155 | Voluntary donor    | ESBL       | 512.0      | 2.0  | 32.0 | 2.0 | 32768.0  |
| 18-47-157 | Voluntary donor    | non-ESBL   | 512.0      | 2.0  | 32.0 | 2.0 | 32768.0  |
| 18-47-158 | Voluntary donor    | non-ESBL   | 512.0      | 4.0  | 32.0 | 2.0 | 32768.0  |
| 18-47-159 | Voluntary donor    | non-ESBL   | 512.0      | 2.0  | 32.0 | 2.0 | 32768.0  |
| 18-47-160 | Voluntary donor    | non-ESBL   | 512.0      | 2.0  | 32.0 | 2.0 | 32768.0  |
| 18-47-161 | Voluntary donor    | non-ESBL   | 512.0      | 2.0  | 32.0 | 2.0 | 32768.0  |
| 18-47-162 | Voluntary donor    | non-ESBL   | 512.0      | 2.0  | 16.0 | 2.0 | 32768.0  |
| 18-47-164 | Voluntary donor    | non-ESBL   | 512.0      | 2.0  | 32.0 | 2.0 | 32768.0  |
| 18-47-167 | Voluntary donor    | non-ESBL   | 512.0      | 1.0  | 32.0 | 2.0 | 65536.0  |
| 18-47-168 | Voluntary donor    | non-ESBL   | 512.0      | 2.0  | 16.0 | 4.0 | 16384.0  |
| 18-47-169 | Voluntary donor    | non-ESBL   | 512.0      | 2.0  | 8.0  | 2.0 | 32768.0  |
| 18-47-170 | Voluntary donor    | non-ESBL   | 256.0      | 2.0  | 32.0 | 2.0 | 32768.0  |
| 18-47-171 | Voluntary donor    | non-ESBL   | 256.0      | 2.0  | 32.0 | 2.0 | 32768.0  |
| 18-47-172 | Voluntary donor    | non-ESBL   | 256.0      | 4.0  | 16.0 | 2.0 | 32768.0  |
| 18-47-174 | Voluntary donor    | ESBL       | 256.0      | 1.0  | 32.0 | 2.0 | 32768.0  |
| 18-47-176 | Voluntary donor    | ESBL       | 512.0      | 2.0  | 16.0 | 2.0 | 32768.0  |
| 18-47-177 | Voluntary donor    | ESBL       | 256.0      | 2.0  | 32.0 | 2.0 | 65536.0  |
| 18-47-178 | Voluntary donor    | ESBL       | 512.0      | 2.0  | 16.0 | 2.0 | 32768.0  |
| 18-47-179 | Voluntary donor    | ESBL       | 512.0      | 2.0  | 16.0 | 2.0 | 32768.0  |
| 18-47-180 | Voluntary donor    | ESBL       | 256.0      | 2.0  | 64.0 | 2.0 | 131072.0 |
| 18-47-183 | Voluntary donor    | non-ESBL   | 256.0      | 2.0  | 32.0 | 2.0 | 65536.0  |
| 18-47-184 | Voluntary donor    | non-ESBL   | 512.0      | 2.0  | 16.0 | 2.0 | 32768.0  |
| 18-47-187 | Voluntary donor    | non-ESBL   | 256.0      | 2.0  | 32.0 | 2.0 | 65536.0  |
| 18-47-188 | Voluntary donor    | non-ESBL   | 512.0      | 2.0  | 16.0 | 2.0 | 16384.0  |
| 18-47-189 | Voluntary donor    | non-ESBL   | 256.0      | 1.0  | 32.0 | 2.0 | 16384.0  |
| 18-47-190 | Voluntary donor    | non-ESBL   | 512.0      | 2.0  | 8.0  | 2.0 | 32768.0  |
| 18-47-191 | Voluntary donor    | non-ESBL   | 512.0      | 2.0  | 16.0 | 2.0 | 32768.0  |
| 18-47-192 | Voluntary donor    | non-ESBL   | 512.0      | 2.0  | 16.0 | 2.0 | 32768.0  |
| 18-47-193 | Voluntary donor    | non-ESBL   | 512.0      | 2.0  | 16.0 | 2.0 | 32768.0  |
| 18-47-194 | Voluntary donor    | non-ESBL   | 512.0      | 2.0  | 16.0 | 2.0 | 65536.0  |
| 18-47-195 | Voluntary donor    | non-ESBL   | 1024.0     | 2.0  | 16.0 | 4.0 | 65536.0  |
| 18-47-196 | Voluntary donor    | non-ESBL   | 512.0      | 2.0  | 16.0 | 2.0 | 65536.0  |
| 18-47-197 | Voluntary donor    | non-ESBL   | 512.0      | 2.0  | 16.0 | 2.0 | 65536.0  |

|           |                 |          |        |      |      |     |         |
|-----------|-----------------|----------|--------|------|------|-----|---------|
| 18-47-199 | Voluntary donor | non-ESBL | 512.0  | 2.0  | 32.0 | 2.0 | 65536.0 |
| 18-47-202 | Voluntary donor | non-ESBL | 1024.0 | 2.0  | 16.0 | 2.0 | 65536.0 |
| 18-47-203 | Voluntary donor | ESBL     | 512.0  | 2.0  | 32.0 | 2.0 | 65536.0 |
| 18-47-204 | Voluntary donor | ESBL     | 512.0  | 2.0  | 16.0 | 2.0 | 32768.0 |
| 18-47-208 | Voluntary donor | ESBL     | 512.0  | 2.0  | 16.0 | 4.0 | 32768.0 |
| 18-47-209 | Voluntary donor | ESBL     | 512.0  | 2.0  | 16.0 | 2.0 | 32768.0 |
| 18-47-210 | Voluntary donor | ESBL     | 1024.0 | 2.0  | 16.0 | 2.0 | 65536.0 |
| 18-47-211 | Voluntary donor | ESBL     | 1024.0 | 2.0  | 16.0 | 2.0 | 32768.0 |
| 18-47-213 | Voluntary donor | ESBL     | 1024.0 | 2.0  | 16.0 | 2.0 | 32768.0 |
| 18-47-224 | Voluntary donor | non-ESBL | 512.0  | 2.0  | 16.0 | 2.0 | 65536.0 |
| 18-47-225 | Voluntary donor | non-ESBL | 1024.0 | 2.0  | 16.0 | 2.0 | 32768.0 |
| 18-47-226 | Voluntary donor | ESBL     | 1024.0 | 2.0  | 32.0 | 2.0 | 32768.0 |
| 18-47-227 | Voluntary donor | ESBL     | 1024.0 | 1.0  | 32.0 | 1.0 | 16384.0 |
| 18-47-228 | Voluntary donor | ESBL     | 1024.0 | 2.0  | 32.0 | 2.0 | 32768.0 |
| 18-47-229 | Inpatient       | ESBL     | 1024.0 | 2.0  | 32.0 | 2.0 | 32768.0 |
| 18-47-230 | Voluntary donor | ESBL     | 512.0  | 2.0  | 32.0 | 2.0 | 32768.0 |
| 18-47-231 | Voluntary donor | ESBL     | 512.0  | 2.0  | 32.0 | 2.0 | 32768.0 |
| 18-47-232 | Inpatient       | ESBL     | 512.0  | 2.0  | 32.0 | 2.0 | 32768.0 |
| 18-47-233 | Voluntary donor | ESBL     | 512.0  | 2.0  | 32.0 | 2.0 | 32768.0 |
| 18-47-235 | Voluntary donor | ESBL     | 512.0  | 2.0  | 32.0 | 2.0 | 32768.0 |
| 18-47-239 | Voluntary donor | ESBL     | 512.0  | 2.0  | 32.0 | 2.0 | 32768.0 |
| 18-47-241 | Voluntary donor | ESBL     | 512.0  | 4.0  | 32.0 | 2.0 | 32768.0 |
| 18-47-242 | Voluntary donor | ESBL     | 512.0  | 2.0  | 32.0 | 2.0 | 32768.0 |
| 18-47-244 | Voluntary donor | ESBL     | 256.0  | 2.0  | 32.0 | 2.0 | 65536.0 |
| 18-47-246 | Voluntary donor | ESBL     | 512.0  | 2.0  | 32.0 | 2.0 | 32768.0 |
| 18-47-247 | Voluntary donor | ESBL     | 512.0  | 2.0  | 32.0 | 2.0 | 32768.0 |
| 18-47-248 | Voluntary donor | ESBL     | 512.0  | 16.0 | 64.0 | 2.0 | 32768.0 |
| 18-47-249 | Voluntary donor | ESBL     | 512.0  | 4.0  | 32.0 | 2.0 | 32768.0 |
| 18-47-251 | Voluntary donor | ESBL     | 1024.0 | 2.0  | 16.0 | 2.0 | 65536.0 |
| 18-47-252 | Voluntary donor | ESBL     | 512.0  | 2.0  | 32.0 | 2.0 | 65536.0 |
| 18-47-253 | Voluntary donor | ESBL     | 1024.0 | 2.0  | 32.0 | 2.0 | 65536.0 |
| 18-47-342 | Voluntary donor | non-ESBL | 512.0  | 2.0  | 16.0 | 2.0 | 65536.0 |
| 18-47-344 | Voluntary donor | non-ESBL | 1024.0 | 2.0  | 32.0 | 2.0 | 65536.0 |
| 18-47-345 | Voluntary donor | non-ESBL | 512.0  | 2.0  | 32.0 | 2.0 | 65536.0 |
| 18-47-347 | Voluntary donor | non-ESBL | 512.0  | 2.0  | 32.0 | 2.0 | 65536.0 |
| 18-47-348 | Voluntary donor | non-ESBL | 512.0  | 2.0  | 32.0 | 2.0 | 65536.0 |
| 18-47-349 | Voluntary donor | non-ESBL | 512.0  | 2.0  | 32.0 | 2.0 | 65536.0 |
| 18-47-350 | Voluntary donor | non-ESBL | 512.0  | 2.0  | 32.0 | 2.0 | 65536.0 |
| 18-47-351 | Voluntary donor | non-ESBL | 512.0  | 2.0  | 16.0 | 2.0 | 65536.0 |
| 18-47-352 | Voluntary donor | non-ESBL | 1024.0 | 2.0  | 32.0 | 2.0 | 65536.0 |
| 18-47-353 | Voluntary donor | non-ESBL | 512.0  | 2.0  | 32.0 | 2.0 | 65536.0 |
| 18-47-358 | Voluntary donor | non-ESBL | 256.0  | 2.0  | 32.0 | 2.0 | 65536.0 |
| 18-47-359 | Voluntary donor | non-ESBL | 256.0  | 4.0  | 32.0 | 2.0 | 65536.0 |
| 18-47-360 | Voluntary donor | non-ESBL | 512.0  | 4.0  | 32.0 | 2.0 | 65536.0 |
| 18-47-362 | Voluntary donor | non-ESBL | 512.0  | 4.0  | 32.0 | 2.0 | 65536.0 |
| 18-47-363 | Voluntary donor | non-ESBL | 512.0  | 2.0  | 32.0 | 2.0 | 65536.0 |
| 18-47-364 | Voluntary donor | non-ESBL | 512.0  | 2.0  | 16.0 | 2.0 | 65536.0 |
| 18-47-369 | Voluntary donor | ESBL     | 512.0  | 2.0  | 32.0 | 2.0 | 32768.0 |
| 18-47-377 | Voluntary donor | ESBL     | 256.0  | 2.0  | 32.0 | 2.0 | 65536.0 |
| 18-47-378 | Voluntary donor | ESBL     | 256.0  | 1.0  | 32.0 | 2.0 | 65536.0 |
| 20-47-10  | Swine feces     | ESBL     | 512.0  | 2.0  | 32.0 | 2.0 | 65536.0 |

|           |             |          |       |     |      |     |          |
|-----------|-------------|----------|-------|-----|------|-----|----------|
| 20-47-100 | Pork meat   | non-ESBL | 512.0 | 1.0 | 32.0 | 2.0 | 65536.0  |
| 20-47-101 | Pork meat   | non-ESBL | 512.0 | 1.0 | 32.0 | 2.0 | 65536.0  |
| 20-47-102 | Pork meat   | ESBL     | 512.0 | 1.0 | 32.0 | 2.0 | 65536.0  |
| 20-47-103 | Pork meat   | ESBL     | 512.0 | 1.0 | 32.0 | 2.0 | 65536.0  |
| 20-47-104 | Pork meat   | ESBL     | 256.0 | 1.0 | 16.0 | 2.0 | 131072.0 |
| 20-47-105 | Pork meat   | non-ESBL | 512.0 | 1.0 | 16.0 | 2.0 | 65536.0  |
| 20-47-106 | Pork meat   | non-ESBL | 512.0 | 1.0 | 16.0 | 2.0 | 65536.0  |
| 20-47-107 | Pork meat   | ESBL     | 512.0 | 1.0 | 32.0 | 2.0 | 32768.0  |
| 20-47-108 | Pork meat   | ESBL     | 512.0 | 1.0 | 32.0 | 2.0 | 65536.0  |
| 20-47-109 | Pork meat   | non-ESBL | 512.0 | 1.0 | 16.0 | 2.0 | 65536.0  |
| 20-47-11  | Swine feces | ESBL     | 512.0 | 1.0 | 16.0 | 2.0 | 65536.0  |
| 20-47-110 | Pork meat   | ESBL     | 512.0 | 1.0 | 32.0 | 2.0 | 65536.0  |
| 20-47-111 | Pork meat   | ESBL     | 512.0 | 1.0 | 32.0 | 2.0 | 65536.0  |
| 20-47-112 | Pork meat   | ESBL     | 512.0 | 1.0 | 32.0 | 2.0 | 65536.0  |
| 20-47-113 | Pork meat   | ESBL     | 512.0 | 2.0 | 32.0 | 2.0 | 65536.0  |
| 20-47-114 | Pork meat   | ESBL     | 512.0 | 1.0 | 32.0 | 2.0 | 65536.0  |
| 20-47-115 | Pork meat   | non-ESBL | 512.0 | 1.0 | 32.0 | 2.0 | 131072.0 |
| 20-47-116 | Pork meat   | non-ESBL | 512.0 | 1.0 | 32.0 | 2.0 | 65536.0  |
| 20-47-117 | Pork meat   | non-ESBL | 512.0 | 1.0 | 32.0 | 2.0 | 65536.0  |
| 20-47-119 | Pork meat   | non-ESBL | 512.0 | 1.0 | 32.0 | 2.0 | 32768.0  |
| 20-47-12  | Swine feces | ESBL     | 512.0 | 2.0 | 32.0 | 2.0 | 65536.0  |
| 20-47-120 | Pork meat   | ESBL     | 512.0 | 2.0 | 32.0 | 2.0 | 32768.0  |
| 20-47-121 | Pork meat   | ESBL     | 512.0 | 2.0 | 16.0 | 2.0 | 32768.0  |
| 20-47-122 | Pork meat   | ESBL     | 512.0 | 1.0 | 32.0 | 2.0 | 32768.0  |
| 20-47-123 | Pork meat   | non-ESBL | 256.0 | 1.0 | 16.0 | 2.0 | 32768.0  |
| 20-47-124 | Pork meat   | ESBL     | 512.0 | 0.5 | 32.0 | 2.0 | 32768.0  |
| 20-47-125 | Pork meat   | non-ESBL | 256.0 | 1.0 | 32.0 | 2.0 | 32768.0  |
| 20-47-126 | Pork meat   | non-ESBL | 512.0 | 1.0 | 32.0 | 2.0 | 32768.0  |
| 20-47-127 | Pork meat   | non-ESBL | 512.0 | 0.5 | 32.0 | 2.0 | 65536.0  |
| 20-47-128 | Pork meat   | non-ESBL | 512.0 | 0.5 | 32.0 | 2.0 | 65536.0  |
| 20-47-129 | Pork meat   | non-ESBL | 512.0 | 0.5 | 32.0 | 2.0 | 65536.0  |
| 20-47-13  | Swine feces | ESBL     | 512.0 | 2.0 | 32.0 | 2.0 | 65536.0  |
| 20-47-130 | Pork meat   | ESBL     | 512.0 | 0.5 | 16.0 | 2.0 | 32768.0  |
| 20-47-131 | Pork meat   | non-ESBL | 512.0 | 4.0 | 32.0 | 4.0 | 32768.0  |
| 20-47-132 | Pork meat   | non-ESBL | 512.0 | 0.5 | 32.0 | 2.0 | 32768.0  |
| 20-47-133 | Pork meat   | non-ESBL | 512.0 | 2.0 | 32.0 | 2.0 | 32768.0  |
| 20-47-134 | Pork meat   | non-ESBL | 512.0 | 1.0 | 32.0 | 2.0 | 32768.0  |
| 20-47-135 | Pork meat   | non-ESBL | 512.0 | 1.0 | 32.0 | 4.0 | 65536.0  |
| 20-47-136 | Pork meat   | ESBL     | 512.0 | 1.0 | 32.0 | 2.0 | 65536.0  |
| 20-47-137 | Pork meat   | non-ESBL | 512.0 | 1.0 | 32.0 | 2.0 | 65536.0  |
| 20-47-138 | Pork meat   | non-ESBL | 512.0 | 1.0 | 32.0 | 2.0 | 32768.0  |
| 20-47-139 | Pork meat   | ESBL     | 512.0 | 1.0 | 32.0 | 2.0 | 65536.0  |
| 20-47-140 | Pork meat   | ESBL     | 512.0 | 1.0 | 32.0 | 2.0 | 65536.0  |
| 20-47-141 | Pork meat   | ESBL     | 512.0 | 1.0 | 32.0 | 2.0 | 32768.0  |
| 20-47-142 | Pork meat   | non-ESBL | 512.0 | 1.0 | 16.0 | 1.0 | 65536.0  |
| 20-47-143 | Pork meat   | non-ESBL | 512.0 | 1.0 | 32.0 | 2.0 | 32768.0  |
| 20-47-144 | Pork meat   | non-ESBL | 512.0 | 1.0 | 32.0 | 2.0 | 65536.0  |
| 20-47-145 | Pork meat   | non-ESBL | 256.0 | 2.0 | 32.0 | 2.0 | 32768.0  |
| 20-47-146 | Pork meat   | non-ESBL | 512.0 | 1.0 | 32.0 | 2.0 | 32768.0  |
| 20-47-147 | Pork meat   | non-ESBL | 256.0 | 2.0 | 32.0 | 2.0 | 32768.0  |
| 20-47-148 | Pork meat   | non-ESBL | 512.0 | 1.0 | 32.0 | 2.0 | 32768.0  |

|           |             |          |        |     |      |     |          |
|-----------|-------------|----------|--------|-----|------|-----|----------|
| 20-47-149 | Pork meat   | non-ESBL | 512.0  | 1.0 | 32.0 | 2.0 | 131072.0 |
| 20-47-150 | Pork meat   | non-ESBL | 512.0  | 1.0 | 32.0 | 2.0 | 65536.0  |
| 20-47-151 | Pork meat   | ESBL     | 512.0  | 0.5 | 16.0 | 2.0 | 65536.0  |
| 20-47-152 | Pork meat   | non-ESBL | 512.0  | 2.0 | 16.0 | 2.0 | 32768.0  |
| 20-47-153 | Pork meat   | non-ESBL | 256.0  | 1.0 | 32.0 | 2.0 | 65536.0  |
| 20-47-154 | Pork meat   | non-ESBL | 512.0  | 1.0 | 32.0 | 2.0 | 32768.0  |
| 20-47-155 | Pork meat   | non-ESBL | 512.0  | 2.0 | 32.0 | 2.0 | 32768.0  |
| 20-47-156 | Pork meat   | ESBL     | 512.0  | 2.0 | 16.0 | 2.0 | 65536.0  |
| 20-47-157 | Pork meat   | ESBL     | 256.0  | 4.0 | 32.0 | 2.0 | 65536.0  |
| 20-47-158 | Pork meat   | non-ESBL | 512.0  | 2.0 | 32.0 | 2.0 | 32768.0  |
| 20-47-159 | Pork meat   | non-ESBL | 512.0  | 2.0 | 32.0 | 2.0 | 32768.0  |
| 20-47-16  | Swine feces | ESBL     | 512.0  | 2.0 | 32.0 | 2.0 | 65536.0  |
| 20-47-160 | Pork meat   | non-ESBL | 512.0  | 2.0 | 32.0 | 2.0 | 131072.0 |
| 20-47-161 | Pork meat   | ESBL     | 512.0  | 2.0 | 32.0 | 2.0 | 32768.0  |
| 20-47-162 | Pork meat   | ESBL     | 512.0  | 2.0 | 32.0 | 2.0 | 32768.0  |
| 20-47-163 | Pork meat   | non-ESBL | 512.0  | 2.0 | 32.0 | 2.0 | 32768.0  |
| 20-47-164 | Pork meat   | ESBL     | 512.0  | 2.0 | 32.0 | 2.0 | 32768.0  |
| 20-47-165 | Pork meat   | ESBL     | 1024.0 | 2.0 | 16.0 | 2.0 | 32768.0  |
| 20-47-166 | Pork meat   | ESBL     | 512.0  | 2.0 | 32.0 | 2.0 | 32768.0  |
| 20-47-167 | Pork meat   | non-ESBL | 1024.0 | 2.0 | 32.0 | 2.0 | 32768.0  |
| 20-47-168 | Pork meat   | non-ESBL | 256.0  | 2.0 | 16.0 | 2.0 | 65536.0  |
| 20-47-169 | Pork meat   | ESBL     | 512.0  | 2.0 | 32.0 | 2.0 | 32768.0  |
| 20-47-170 | Pork meat   | ESBL     | 512.0  | 2.0 | 32.0 | 2.0 | 32768.0  |
| 20-47-171 | Pork meat   | ESBL     | 512.0  | 2.0 | 32.0 | 2.0 | 32768.0  |
| 20-47-172 | Pork meat   | ESBL     | 512.0  | 2.0 | 32.0 | 2.0 | 16384.0  |
| 20-47-173 | Pork meat   | ESBL     | 512.0  | 2.0 | 32.0 | 2.0 | 32768.0  |
| 20-47-174 | Pork meat   | ESBL     | 256.0  | 2.0 | 16.0 | 2.0 | 32768.0  |
| 20-47-175 | Pork meat   | ESBL     | 256.0  | 2.0 | 16.0 | 2.0 | 65536.0  |
| 20-47-176 | Pork meat   | ESBL     | 512.0  | 2.0 | 32.0 | 2.0 | 32768.0  |
| 20-47-177 | Pork meat   | ESBL     | 256.0  | 2.0 | 32.0 | 2.0 | 131072.0 |
| 20-47-178 | Pork meat   | ESBL     | 512.0  | 2.0 | 32.0 | 2.0 | 32768.0  |
| 20-47-179 | Pork meat   | ESBL     | 512.0  | 2.0 | 32.0 | 2.0 | 32768.0  |
| 20-47-18  | Swine feces | ESBL     | 512.0  | 2.0 | 32.0 | 2.0 | 65536.0  |
| 20-47-180 | Pork meat   | ESBL     | 512.0  | 2.0 | 32.0 | 2.0 | 32768.0  |
| 20-47-181 | Pork meat   | non-ESBL | 256.0  | 2.0 | 32.0 | 2.0 | 32768.0  |
| 20-47-182 | Pork meat   | non-ESBL | 512.0  | 2.0 | 32.0 | 2.0 | 32768.0  |
| 20-47-183 | Swine feces | non-ESBL | 512.0  | 2.0 | 32.0 | 2.0 | 32768.0  |
| 20-47-184 | Swine feces | non-ESBL | 512.0  | 2.0 | 16.0 | 2.0 | 32768.0  |
| 20-47-185 | Swine feces | non-ESBL | 512.0  | 2.0 | 32.0 | 2.0 | 32768.0  |
| 20-47-186 | Swine feces | non-ESBL | 512.0  | 4.0 | 32.0 | 2.0 | 32768.0  |
| 20-47-187 | Swine feces | non-ESBL | 256.0  | 2.0 | 32.0 | 2.0 | 32768.0  |
| 20-47-188 | Swine feces | non-ESBL | 256.0  | 2.0 | 32.0 | 2.0 | 32768.0  |
| 20-47-189 | Swine feces | non-ESBL | 512.0  | 2.0 | 32.0 | 2.0 | 32768.0  |
| 20-47-19  | Swine feces | ESBL     | 512.0  | 2.0 | 32.0 | 2.0 | 32768.0  |
| 20-47-190 | Swine feces | non-ESBL | 256.0  | 2.0 | 32.0 | 2.0 | 32768.0  |
| 20-47-191 | Swine feces | non-ESBL | 256.0  | 2.0 | 32.0 | 1.0 | 65536.0  |
| 20-47-192 | Swine feces | non-ESBL | 256.0  | 2.0 | 32.0 | 2.0 | 131072.0 |
| 20-47-193 | Swine feces | non-ESBL | 512.0  | 2.0 | 32.0 | 2.0 | 32768.0  |
| 20-47-194 | Swine feces | non-ESBL | 512.0  | 4.0 | 16.0 | 2.0 | 32768.0  |
| 20-47-195 | Swine feces | non-ESBL | 512.0  | 2.0 | 16.0 | 2.0 | 32768.0  |
| 20-47-197 | Swine feces | non-ESBL | 512.0  | 2.0 | 32.0 | 2.0 | 32768.0  |

|           |             |          |        |     |      |     |          |
|-----------|-------------|----------|--------|-----|------|-----|----------|
| 20-47-198 | Swine feces | non-ESBL | 512.0  | 2.0 | 32.0 | 2.0 | 32768.0  |
| 20-47-199 | Swine feces | non-ESBL | 512.0  | 4.0 | 64.0 | 2.0 | 65536.0  |
| 20-47-2   | Swine feces | ESBL     | 1024.0 | 2.0 | 64.0 | 2.0 | 65536.0  |
| 20-47-20  | Swine feces | ESBL     | 512.0  | 2.0 | 32.0 | 2.0 | 65536.0  |
| 20-47-200 | Swine feces | non-ESBL | 256.0  | 2.0 | 32.0 | 2.0 | 32768.0  |
| 20-47-202 | Swine feces | non-ESBL | 512.0  | 2.0 | 32.0 | 2.0 | 65536.0  |
| 20-47-203 | Swine feces | non-ESBL | 512.0  | 2.0 | 16.0 | 2.0 | 32768.0  |
| 20-47-204 | Swine feces | non-ESBL | 512.0  | 2.0 | 32.0 | 2.0 | 65536.0  |
| 20-47-205 | Swine feces | non-ESBL | 512.0  | 2.0 | 16.0 | 2.0 | 32768.0  |
| 20-47-206 | Swine feces | non-ESBL | 512.0  | 2.0 | 32.0 | 2.0 | 65536.0  |
| 20-47-207 | Swine feces | non-ESBL | 512.0  | 2.0 | 32.0 | 2.0 | 65536.0  |
| 20-47-208 | Swine feces | non-ESBL | 512.0  | 2.0 | 32.0 | 2.0 | 65536.0  |
| 20-47-209 | Swine feces | non-ESBL | 512.0  | 2.0 | 32.0 | 2.0 | 65536.0  |
| 20-47-21  | Swine feces | ESBL     | 512.0  | 4.0 | 16.0 | 2.0 | 32768.0  |
| 20-47-210 | Swine feces | non-ESBL | 512.0  | 2.0 | 16.0 | 2.0 | 65536.0  |
| 20-47-211 | Swine feces | non-ESBL | 512.0  | 2.0 | 32.0 | 2.0 | 65536.0  |
| 20-47-212 | Swine feces | non-ESBL | 512.0  | 2.0 | 32.0 | 2.0 | 65536.0  |
| 20-47-213 | Swine feces | non-ESBL | 512.0  | 2.0 | 32.0 | 2.0 | 32768.0  |
| 20-47-214 | Swine feces | non-ESBL | 512.0  | 2.0 | 16.0 | 2.0 | 131072.0 |
| 20-47-215 | Swine feces | non-ESBL | 512.0  | 2.0 | 16.0 | 2.0 | 65536.0  |
| 20-47-216 | Swine feces | non-ESBL | 512.0  | 2.0 | 64.0 | 2.0 | 65536.0  |
| 20-47-217 | Swine feces | non-ESBL | 512.0  | 2.0 | 32.0 | 2.0 | 65536.0  |
| 20-47-219 | Swine feces | non-ESBL | 512.0  | 2.0 | 32.0 | 2.0 | 65536.0  |
| 20-47-220 | Swine feces | non-ESBL | 512.0  | 2.0 | 32.0 | 2.0 | 32768.0  |
| 20-47-222 | Swine feces | non-ESBL | 512.0  | 2.0 | 32.0 | 2.0 | 32768.0  |
| 20-47-223 | Swine feces | non-ESBL | 512.0  | 2.0 | 32.0 | 2.0 | 32768.0  |
| 20-47-224 | Swine feces | non-ESBL | 256.0  | 1.0 | 32.0 | 2.0 | 65536.0  |
| 20-47-225 | Swine feces | non-ESBL | 256.0  | 2.0 | 32.0 | 2.0 | 32768.0  |
| 20-47-226 | Swine feces | non-ESBL | 512.0  | 2.0 | 32.0 | 2.0 | 32768.0  |
| 20-47-227 | Swine feces | non-ESBL | 256.0  | 2.0 | 32.0 | 2.0 | 32768.0  |
| 20-47-228 | Swine feces | non-ESBL | 512.0  | 2.0 | 32.0 | 2.0 | 65536.0  |
| 20-47-229 | Swine feces | non-ESBL | 512.0  | 2.0 | 32.0 | 2.0 | 32768.0  |
| 20-47-23  | Swine feces | ESBL     | 512.0  | 2.0 | 16.0 | 2.0 | 32768.0  |
| 20-47-230 | Swine feces | non-ESBL | 512.0  | 2.0 | 32.0 | 2.0 | 32768.0  |
| 20-47-231 | Swine feces | non-ESBL | 512.0  | 2.0 | 32.0 | 2.0 | 32768.0  |
| 20-47-232 | Swine feces | non-ESBL | 512.0  | 2.0 | 32.0 | 2.0 | 65536.0  |
| 20-47-233 | Swine feces | non-ESBL | 512.0  | 2.0 | 32.0 | 2.0 | 32768.0  |
| 20-47-24  | Swine feces | ESBL     | 512.0  | 2.0 | 16.0 | 2.0 | 16384.0  |
| 20-47-25  | Swine feces | ESBL     | 512.0  | 2.0 | 32.0 | 2.0 | 32768.0  |
| 20-47-27  | Swine feces | ESBL     | 512.0  | 4.0 | 32.0 | 2.0 | 65536.0  |
| 20-47-28  | Swine feces | ESBL     | 512.0  | 2.0 | 32.0 | 2.0 | 65536.0  |
| 20-47-29  | Swine feces | ESBL     | 512.0  | 2.0 | 16.0 | 1.0 | 65536.0  |
| 20-47-30  | Swine feces | ESBL     | 256.0  | 2.0 | 16.0 | 2.0 | 32768.0  |
| 20-47-31  | Swine feces | ESBL     | 512.0  | 2.0 | 16.0 | 2.0 | 32768.0  |
| 20-47-32  | Swine feces | ESBL     | 512.0  | 2.0 | 16.0 | 2.0 | 32768.0  |
| 20-47-33  | Swine feces | ESBL     | 512.0  | 2.0 | 32.0 | 2.0 | 32768.0  |
| 20-47-34  | Swine feces | ESBL     | 512.0  | 2.0 | 32.0 | 2.0 | 32768.0  |
| 20-47-35  | Swine feces | ESBL     | 512.0  | 2.0 | 16.0 | 1.0 | 32768.0  |
| 20-47-36  | Swine feces | ESBL     | 512.0  | 2.0 | 16.0 | 1.0 | 32768.0  |
| 20-47-37  | Swine feces | ESBL     | 256.0  | 2.0 | 16.0 | 2.0 | 32768.0  |
| 20-47-38  | Swine feces | ESBL     | 512.0  | 2.0 | 16.0 | 2.0 | 16384.0  |

|           |             |          |       |     |      |     |          |
|-----------|-------------|----------|-------|-----|------|-----|----------|
| 20-47-4   | Swine feces | ESBL     | 512.0 | 4.0 | 32.0 | 2.0 | 65536.0  |
| 20-47-40  | Swine feces | ESBL     | 512.0 | 2.0 | 16.0 | 2.0 | 16384.0  |
| 20-47-41  | Swine feces | ESBL     | 512.0 | 2.0 | 32.0 | 2.0 | 32768.0  |
| 20-47-42  | Swine feces | ESBL     | 512.0 | 4.0 | 16.0 | 2.0 | 32768.0  |
| 20-47-43  | Swine feces | ESBL     | 256.0 | 4.0 | 16.0 | 2.0 | 32768.0  |
| 20-47-44  | Swine feces | ESBL     | 256.0 | 4.0 | 32.0 | 2.0 | 32768.0  |
| 20-47-45  | Swine feces | ESBL     | 256.0 | 2.0 | 16.0 | 2.0 | 16384.0  |
| 20-47-46  | Swine feces | ESBL     | 512.0 | 1.0 | 16.0 | 2.0 | 32768.0  |
| 20-47-47  | Swine feces | ESBL     | 512.0 | 2.0 | 32.0 | 2.0 | 65536.0  |
| 20-47-48  | Swine feces | ESBL     | 512.0 | 1.0 | 32.0 | 2.0 | 32768.0  |
| 20-47-49  | Swine feces | ESBL     | 512.0 | 1.0 | 16.0 | 2.0 | 32768.0  |
| 20-47-5   | Swine feces | ESBL     | 512.0 | 2.0 | 32.0 | 2.0 | 65536.0  |
| 20-47-50  | Swine feces | ESBL     | 512.0 | 1.0 | 32.0 | 2.0 | 32768.0  |
| 20-47-51  | Swine feces | ESBL     | 512.0 | 1.0 | 32.0 | 2.0 | 32768.0  |
| 20-47-52  | Swine feces | ESBL     | 512.0 | 1.0 | 32.0 | 2.0 | 32768.0  |
| 20-47-53  | Swine feces | ESBL     | 512.0 | 1.0 | 16.0 | 2.0 | 32768.0  |
| 20-47-55  | Swine feces | ESBL     | 512.0 | 2.0 | 32.0 | 2.0 | 32768.0  |
| 20-47-56  | Swine feces | ESBL     | 512.0 | 1.0 | 16.0 | 2.0 | 32768.0  |
| 20-47-58  | Swine feces | ESBL     | 256.0 | 2.0 | 32.0 | 2.0 | 65536.0  |
| 20-47-59  | Swine feces | ESBL     | 256.0 | 1.0 | 16.0 | 2.0 | 32768.0  |
| 20-47-6   | Swine feces | ESBL     | 256.0 | 2.0 | 32.0 | 2.0 | 65536.0  |
| 20-47-60  | Swine feces | ESBL     | 256.0 | 2.0 | 32.0 | 2.0 | 65536.0  |
| 20-47-65  | Swine feces | non-ESBL | 512.0 | 1.0 | 32.0 | 2.0 | 32768.0  |
| 20-47-66  | Swine feces | non-ESBL | 512.0 | 2.0 | 16.0 | 2.0 | 65536.0  |
| 20-47-67  | Swine feces | non-ESBL | 512.0 | 2.0 | 32.0 | 2.0 | 65536.0  |
| 20-47-7   | Swine feces | ESBL     | 512.0 | 2.0 | 32.0 | 2.0 | 65536.0  |
| 20-47-8   | Swine feces | ESBL     | 512.0 | 2.0 | 32.0 | 2.0 | 65536.0  |
| 20-47-83  | Pork meat   | non-ESBL | 512.0 | 2.0 | 16.0 | 2.0 | 32768.0  |
| 20-47-84  | Pork meat   | non-ESBL | 512.0 | 1.0 | 32.0 | 2.0 | 32768.0  |
| 20-47-85  | Pork meat   | non-ESBL | 512.0 | 1.0 | 16.0 | 2.0 | 32768.0  |
| 20-47-86  | Pork meat   | ESBL     | 512.0 | 1.0 | 32.0 | 2.0 | 32768.0  |
| 20-47-87  | Pork meat   | ESBL     | 512.0 | 2.0 | 32.0 | 2.0 | 32768.0  |
| 20-47-88  | Pork meat   | ESBL     | 512.0 | 1.0 | 32.0 | 2.0 | 32768.0  |
| 20-47-89  | Pork meat   | non-ESBL | 512.0 | 1.0 | 32.0 | 2.0 | 65536.0  |
| 20-47-9   | Swine feces | ESBL     | 512.0 | 2.0 | 32.0 | 2.0 | 65536.0  |
| 20-47-90  | Pork meat   | non-ESBL | 512.0 | 2.0 | 32.0 | 2.0 | 32768.0  |
| 20-47-91  | Pork meat   | non-ESBL | 512.0 | 1.0 | 32.0 | 2.0 | 32768.0  |
| 20-47-92  | Pork meat   | ESBL     | 512.0 | 8.0 | 32.0 | 2.0 | 32768.0  |
| 20-47-93  | Pork meat   | non-ESBL | 512.0 | 1.0 | 32.0 | 2.0 | 32768.0  |
| 20-47-94  | Pork meat   | ESBL     | 512.0 | 1.0 | 32.0 | 2.0 | 32768.0  |
| 20-47-95  | Pork meat   | ESBL     | 256.0 | 1.0 | 32.0 | 2.0 | 32768.0  |
| 20-47-96  | Pork meat   | non-ESBL | 512.0 | 2.0 | 32.0 | 2.0 | 32768.0  |
| 20-47-97  | Pork meat   | non-ESBL | 256.0 | 1.0 | 32.0 | 2.0 | 65536.0  |
| 20-47-98  | Pork meat   | non-ESBL | 256.0 | 1.0 | 16.0 | 2.0 | 32768.0  |
| 20-47-99  | Pork meat   | non-ESBL | 512.0 | 1.0 | 32.0 | 2.0 | 65536.0  |
| 21-47-10  | Inpatient   | ESBL     | 512.0 | 1.0 | 16.0 | 2.0 | 32768.0  |
| 21-47-100 | Inpatient   | ESBL     | 512.0 | 8.0 | 32.0 | 2.0 | 65536.0  |
| 21-47-101 | Inpatient   | ESBL     | 512.0 | 1.0 | 16.0 | 2.0 | 65536.0  |
| 21-47-102 | Inpatient   | non-ESBL | 512.0 | 2.0 | 32.0 | 2.0 | 65536.0  |
| 21-47-103 | Inpatient   | ESBL     | 512.0 | 1.0 | 32.0 | 2.0 | 65536.0  |
| 21-47-104 | Inpatient   | ESBL     | 512.0 | 2.0 | 32.0 | 2.0 | 131072.0 |

|           |           |          |        |     |      |     |         |
|-----------|-----------|----------|--------|-----|------|-----|---------|
| 21-47-105 | Inpatient | non-ESBL | 512.0  | 2.0 | 32.0 | 2.0 | 65536.0 |
| 21-47-106 | Inpatient | non-ESBL | 512.0  | 1.0 | 32.0 | 2.0 | 32768.0 |
| 21-47-107 | Inpatient | non-ESBL | 512.0  | 2.0 | 32.0 | 2.0 | 65536.0 |
| 21-47-108 | Inpatient | non-ESBL | 512.0  | 2.0 | 32.0 | 2.0 | 65536.0 |
| 21-47-109 | Inpatient | non-ESBL | 512.0  | 2.0 | 32.0 | 2.0 | 65536.0 |
| 21-47-11  | Inpatient | ESBL     | 512.0  | 2.0 | 32.0 | 2.0 | 65536.0 |
| 21-47-110 | Inpatient | non-ESBL | 512.0  | 1.0 | 16.0 | 2.0 | 32768.0 |
| 21-47-111 | Inpatient | non-ESBL | 512.0  | 2.0 | 64.0 | 2.0 | 32768.0 |
| 21-47-112 | Inpatient | non-ESBL | 512.0  | 2.0 | 32.0 | 2.0 | 65536.0 |
| 21-47-113 | Inpatient | non-ESBL | 512.0  | 2.0 | 32.0 | 4.0 | 65536.0 |
| 21-47-114 | Inpatient | non-ESBL | 512.0  | 8.0 | 32.0 | 2.0 | 32768.0 |
| 21-47-115 | Inpatient | non-ESBL | 512.0  | 2.0 | 32.0 | 2.0 | 65536.0 |
| 21-47-116 | Inpatient | non-ESBL | 512.0  | 2.0 | 32.0 | 2.0 | 65536.0 |
| 21-47-117 | Inpatient | non-ESBL | 512.0  | 2.0 | 32.0 | 2.0 | 32768.0 |
| 21-47-118 | Inpatient | non-ESBL | 512.0  | 4.0 | 32.0 | 2.0 | 65536.0 |
| 21-47-119 | Inpatient | non-ESBL | 512.0  | 2.0 | 32.0 | 4.0 | 65536.0 |
| 21-47-12  | Inpatient | ESBL     | 512.0  | 2.0 | 32.0 | 2.0 | 32768.0 |
| 21-47-121 | Inpatient | non-ESBL | 512.0  | 2.0 | 16.0 | 2.0 | 65536.0 |
| 21-47-122 | Inpatient | non-ESBL | 512.0  | 1.0 | 16.0 | 2.0 | 65536.0 |
| 21-47-123 | Inpatient | non-ESBL | 512.0  | 2.0 | 16.0 | 2.0 | 65536.0 |
| 21-47-124 | Inpatient | non-ESBL | 512.0  | 2.0 | 32.0 | 2.0 | 32768.0 |
| 21-47-125 | Inpatient | non-ESBL | 512.0  | 2.0 | 32.0 | 2.0 | 65536.0 |
| 21-47-126 | Inpatient | non-ESBL | 512.0  | 2.0 | 32.0 | 2.0 | 65536.0 |
| 21-47-127 | Inpatient | non-ESBL | 512.0  | 2.0 | 32.0 | 2.0 | 32768.0 |
| 21-47-128 | Inpatient | non-ESBL | 512.0  | 2.0 | 16.0 | 2.0 | 32768.0 |
| 21-47-129 | Inpatient | non-ESBL | 512.0  | 2.0 | 32.0 | 2.0 | 32768.0 |
| 21-47-13  | Inpatient | ESBL     | 512.0  | 2.0 | 32.0 | 2.0 | 32768.0 |
| 21-47-14  | Inpatient | ESBL     | 512.0  | 2.0 | 16.0 | 2.0 | 32768.0 |
| 21-47-15  | Inpatient | ESBL     | 512.0  | 2.0 | 16.0 | 2.0 | 65536.0 |
| 21-47-16  | Inpatient | ESBL     | 512.0  | 2.0 | 32.0 | 2.0 | 65536.0 |
| 21-47-17  | Inpatient | ESBL     | 512.0  | 2.0 | 32.0 | 2.0 | 65536.0 |
| 21-47-19  | Inpatient | ESBL     | 512.0  | 2.0 | 32.0 | 2.0 | 32768.0 |
| 21-47-2   | Inpatient | ESBL     | 512.0  | 2.0 | 16.0 | 2.0 | 65536.0 |
| 21-47-20  | Inpatient | ESBL     | 512.0  | 2.0 | 32.0 | 2.0 | 65536.0 |
| 21-47-22  | Inpatient | ESBL     | 512.0  | 2.0 | 16.0 | 2.0 | 32768.0 |
| 21-47-23  | Inpatient | ESBL     | 512.0  | 2.0 | 32.0 | 2.0 | 65536.0 |
| 21-47-25  | Inpatient | ESBL     | 512.0  | 2.0 | 16.0 | 2.0 | 32768.0 |
| 21-47-26  | Inpatient | ESBL     | 512.0  | 2.0 | 16.0 | 2.0 | 32768.0 |
| 21-47-27  | Inpatient | ESBL     | 1024.0 | 2.0 | 32.0 | 2.0 | 65536.0 |
| 21-47-28  | Inpatient | ESBL     | 512.0  | 2.0 | 32.0 | 2.0 | 65536.0 |
| 21-47-29  | Inpatient | ESBL     | 512.0  | 2.0 | 16.0 | 1.0 | 32768.0 |
| 21-47-3   | Inpatient | ESBL     | 512.0  | 2.0 | 16.0 | 2.0 | 65536.0 |
| 21-47-30  | Inpatient | ESBL     | 512.0  | 2.0 | 16.0 | 2.0 | 65536.0 |
| 21-47-31  | Inpatient | ESBL     | 512.0  | 2.0 | 32.0 | 2.0 | 32768.0 |
| 21-47-32  | Inpatient | ESBL     | 512.0  | 2.0 | 32.0 | 2.0 | 32768.0 |
| 21-47-33  | Inpatient | non-ESBL | 512.0  | 2.0 | 8.0  | 2.0 | 16384.0 |
| 21-47-34  | Inpatient | ESBL     | 256.0  | 2.0 | 32.0 | 2.0 | 65536.0 |
| 21-47-35  | Inpatient | ESBL     | 512.0  | 2.0 | 16.0 | 2.0 | 65536.0 |
| 21-47-37  | Inpatient | ESBL     | 512.0  | 2.0 | 32.0 | 2.0 | 65536.0 |
| 21-47-39  | Inpatient | ESBL     | 512.0  | 2.0 | 32.0 | 2.0 | 32768.0 |
| 21-47-4   | Inpatient | ESBL     | 512.0  | 2.0 | 16.0 | 2.0 | 65536.0 |

|          |           |          |        |     |       |     |         |
|----------|-----------|----------|--------|-----|-------|-----|---------|
| 21-47-40 | Inpatient | ESBL     | 512.0  | 2.0 | 16.0  | 2.0 | 65536.0 |
| 21-47-41 | Inpatient | ESBL     | 512.0  | 2.0 | 16.0  | 2.0 | 65536.0 |
| 21-47-42 | Inpatient | non-ESBL | 512.0  | 2.0 | 16.0  | 2.0 | 65536.0 |
| 21-47-43 | Inpatient | ESBL     | 512.0  | 2.0 | 16.0  | 2.0 | 65536.0 |
| 21-47-44 | Inpatient | ESBL     | 512.0  | 2.0 | 16.0  | 2.0 | 65536.0 |
| 21-47-45 | Inpatient | ESBL     | 1024.0 | 2.0 | 32.0  | 2.0 | 65536.0 |
| 21-47-46 | Inpatient | ESBL     | 512.0  | 2.0 | 32.0  | 2.0 | 65536.0 |
| 21-47-47 | Inpatient | ESBL     | 512.0  | 2.0 | 32.0  | 2.0 | 65536.0 |
| 21-47-48 | Inpatient | ESBL     | 512.0  | 2.0 | 32.0  | 2.0 | 65536.0 |
| 21-47-49 | Inpatient | ESBL     | 1024.0 | 2.0 | 32.0  | 2.0 | 65536.0 |
| 21-47-50 | Inpatient | ESBL     | 512.0  | 2.0 | 32.0  | 2.0 | 65536.0 |
| 21-47-51 | Inpatient | ESBL     | 512.0  | 2.0 | 16.0  | 2.0 | 65536.0 |
| 21-47-52 | Inpatient | ESBL     | 512.0  | 2.0 | 32.0  | 2.0 | 65536.0 |
| 21-47-53 | Inpatient | ESBL     | 512.0  | 2.0 | 32.0  | 2.0 | 32768.0 |
| 21-47-55 | Inpatient | ESBL     | 256.0  | 2.0 | 32.0  | 2.0 | 32768.0 |
| 21-47-6  | Inpatient | ESBL     | 512.0  | 2.0 | 16.0  | 2.0 | 32768.0 |
| 21-47-7  | Inpatient | ESBL     | 512.0  | 2.0 | 16.0  | 2.0 | 32768.0 |
| 21-47-8  | Inpatient | ESBL     | 512.0  | 2.0 | 16.0  | 2.0 | 32768.0 |
| 21-47-80 | Inpatient | ESBL     | 256.0  | 2.0 | 64.0  | 2.0 | 32768.0 |
| 21-47-81 | Inpatient | ESBL     | 512.0  | 2.0 | 64.0  | 2.0 | 32768.0 |
| 21-47-82 | Inpatient | ESBL     | 512.0  | 2.0 | 64.0  | 2.0 | 65536.0 |
| 21-47-83 | Inpatient | ESBL     | 512.0  | 4.0 | 128.0 | 2.0 | 65536.0 |
| 21-47-84 | Inpatient | ESBL     | 512.0  | 2.0 | 64.0  | 2.0 | 65536.0 |
| 21-47-85 | Inpatient | ESBL     | 512.0  | 4.0 | 64.0  | 2.0 | 32768.0 |
| 21-47-86 | Inpatient | ESBL     | 512.0  | 2.0 | 64.0  | 2.0 | 32768.0 |
| 21-47-87 | Inpatient | ESBL     | 512.0  | 2.0 | 32.0  | 2.0 | 65536.0 |
| 21-47-88 | Inpatient | ESBL     | 512.0  | 2.0 | 64.0  | 2.0 | 32768.0 |
| 21-47-89 | Inpatient | ESBL     | 512.0  | 1.0 | 32.0  | 2.0 | 65536.0 |
| 21-47-9  | Inpatient | ESBL     | 512.0  | 2.0 | 16.0  | 2.0 | 65536.0 |
| 21-47-90 | Inpatient | ESBL     | 512.0  | 2.0 | 32.0  | 2.0 | 65536.0 |
| 21-47-91 | Inpatient | ESBL     | 512.0  | 2.0 | 64.0  | 4.0 | 32768.0 |
| 21-47-92 | Inpatient | ESBL     | 512.0  | 1.0 | 64.0  | 2.0 | 65536.0 |
| 21-47-93 | Inpatient | ESBL     | 1024.0 | 1.0 | 64.0  | 2.0 | 32768.0 |
| 21-47-94 | Inpatient | ESBL     | 2048.0 | 1.0 | 64.0  | 2.0 | 65536.0 |
| 21-47-95 | Inpatient | ESBL     | 512.0  | 2.0 | 64.0  | 2.0 | 32768.0 |
| 21-47-96 | Inpatient | ESBL     | 512.0  | 2.0 | 16.0  | 2.0 | 65536.0 |
| 21-47-97 | Inpatient | ESBL     | 1024.0 | 1.0 | 32.0  | 2.0 | 32768.0 |
| 21-47-98 | Inpatient | ESBL     | 512.0  | 2.0 | 32.0  | 2.0 | 32768.0 |
| 21-47-99 | Inpatient | ESBL     | 512.0  | 8.0 | 32.0  | 2.0 | 65536.0 |

MIC=minimum inhibitory concentration; MBC=minimum bactericidal concentration

GDA=glutaraldehyde; CHG=chlorhexidine digluconate; BAC=benzalkonium chloride; OCT=octenidine dihydrochloride; IPA=iso

ESBL=extended-spectrum beta-lactamase- producing *E. coli*



| NaOCl  | PCMC  | MBC (mg/L) |      |      |     |          | NaOCl  | PCMC   |
|--------|-------|------------|------|------|-----|----------|--------|--------|
|        |       | GDA        | CHG  | BAC  | OCT | IPA      |        |        |
| 256.0  | 512.0 | 512.0      | 2.0  | 64.0 | 2.0 | 65536.0  | 512.0  | 1024.0 |
| 512.0  | 256.0 | 512.0      | 2.0  | 32.0 | 2.0 | 131072.0 | 1024.0 | 512.0  |
| 256.0  | 512.0 | 512.0      | 2.0  | 64.0 | 2.0 | 131072.0 | 512.0  | 1024.0 |
| 512.0  | 256.0 | 512.0      | 1.0  | 32.0 | 2.0 | 131072.0 | 1024.0 | 512.0  |
| 512.0  | 512.0 | 512.0      | 2.0  | 32.0 | 2.0 | 131072.0 | 512.0  | 1024.0 |
| 256.0  | 512.0 | 512.0      | 8.0  | 32.0 | 2.0 | 65536.0  | 512.0  | 1024.0 |
| 512.0  | 512.0 | 512.0      | 2.0  | 32.0 | 2.0 | 131072.0 | 512.0  | 1024.0 |
| 256.0  | 256.0 | 512.0      | 2.0  | 32.0 | 2.0 | 131072.0 | 512.0  | 512.0  |
| 512.0  | 256.0 | 512.0      | 8.0  | 32.0 | 2.0 | 131072.0 | 512.0  | 512.0  |
| 512.0  | 512.0 | 512.0      | 2.0  | 32.0 | 2.0 | 65536.0  | 512.0  | 512.0  |
| 256.0  | 256.0 | 512.0      | 2.0  | 16.0 | 2.0 | 131072.0 | 512.0  | 512.0  |
| 512.0  | 512.0 | 512.0      | 16.0 | 64.0 | 2.0 | 131072.0 | 512.0  | 512.0  |
| 256.0  | 256.0 | 512.0      | 2.0  | 32.0 | 2.0 | 131072.0 | 512.0  | 512.0  |
| 256.0  | 256.0 | 512.0      | 2.0  | 64.0 | 2.0 | 262144.0 | 256.0  | 512.0  |
| 256.0  | 256.0 | 512.0      | 4.0  | 64.0 | 2.0 | 65536.0  | 512.0  | 512.0  |
| 512.0  | 512.0 | 512.0      | 2.0  | 64.0 | 2.0 | 131072.0 | 512.0  | 512.0  |
| 512.0  | 256.0 | 512.0      | 4.0  | 32.0 | 2.0 | 131072.0 | 512.0  | 512.0  |
| 512.0  | 512.0 | 512.0      | 4.0  | 32.0 | 2.0 | 131072.0 | 512.0  | 512.0  |
| 256.0  | 256.0 | 512.0      | 2.0  | 32.0 | 2.0 | 131072.0 | 512.0  | 512.0  |
| 256.0  | 512.0 | 512.0      | 2.0  | 32.0 | 2.0 | 65536.0  | 512.0  | 512.0  |
| 512.0  | 512.0 | 512.0      | 2.0  | 32.0 | 2.0 | 131072.0 | 512.0  | 512.0  |
| 256.0  | 256.0 | 512.0      | 2.0  | 16.0 | 2.0 | 131072.0 | 512.0  | 512.0  |
| 512.0  | 512.0 | 512.0      | 2.0  | 32.0 | 2.0 | 131072.0 | 512.0  | 512.0  |
| 1024.0 | 256.0 | 512.0      | 1.0  | 32.0 | 2.0 | 131072.0 | 1024.0 | 512.0  |
| 256.0  | 256.0 | 512.0      | 2.0  | 16.0 | 4.0 | 65536.0  | 256.0  | 256.0  |
| 256.0  | 256.0 | 512.0      | 2.0  | 8.0  | 2.0 | 131072.0 | 512.0  | 512.0  |
| 512.0  | 256.0 | 256.0      | 1.0  | 32.0 | 2.0 | 65536.0  | 1024.0 | 512.0  |
| 1024.0 | 256.0 | 256.0      | 2.0  | 64.0 | 4.0 | 131072.0 | 1024.0 | 512.0  |
| 512.0  | 256.0 | 256.0      | 4.0  | 16.0 | 2.0 | 131072.0 | 512.0  | 512.0  |
| 512.0  | 256.0 | 256.0      | 2.0  | 32.0 | 2.0 | 65536.0  | 1024.0 | 512.0  |
| 256.0  | 256.0 | 512.0      | 2.0  | 32.0 | 2.0 | 131072.0 | 512.0  | 512.0  |
| 1024.0 | 256.0 | 512.0      | 2.0  | 32.0 | 2.0 | 131072.0 | 1024.0 | 512.0  |
| 256.0  | 256.0 | 512.0      | 2.0  | 64.0 | 4.0 | 65536.0  | 512.0  | 512.0  |
| 256.0  | 256.0 | 512.0      | 2.0  | 16.0 | 4.0 | 131072.0 | 256.0  | 512.0  |
| 1024.0 | 256.0 | 256.0      | 2.0  | 64.0 | 2.0 | 262144.0 | 1024.0 | 256.0  |
| 1024.0 | 256.0 | 512.0      | 2.0  | 32.0 | 2.0 | 131072.0 | 2048.0 | 512.0  |
| 256.0  | 256.0 | 512.0      | 2.0  | 16.0 | 8.0 | 131072.0 | 256.0  | 512.0  |
| 1024.0 | 256.0 | 256.0      | 2.0  | 32.0 | 2.0 | 131072.0 | 1024.0 | 512.0  |
| 512.0  | 256.0 | 512.0      | 2.0  | 16.0 | 2.0 | 65536.0  | 512.0  | 512.0  |
| 512.0  | 256.0 | 256.0      | 2.0  | 32.0 | 2.0 | 65536.0  | 1024.0 | 512.0  |
| 256.0  | 256.0 | 512.0      | 2.0  | 16.0 | 2.0 | 131072.0 | 512.0  | 512.0  |
| 512.0  | 256.0 | 512.0      | 2.0  | 16.0 | 2.0 | 65536.0  | 512.0  | 512.0  |
| 512.0  | 256.0 | 512.0      | 2.0  | 16.0 | 2.0 | 131072.0 | 512.0  | 1024.0 |
| 512.0  | 512.0 | 512.0      | 2.0  | 16.0 | 2.0 | 131072.0 | 1024.0 | 1024.0 |
| 512.0  | 256.0 | 512.0      | 2.0  | 16.0 | 2.0 | 131072.0 | 512.0  | 512.0  |
| 512.0  | 512.0 | 1024.0     | 4.0  | 16.0 | 4.0 | 131072.0 | 512.0  | 512.0  |
| 512.0  | 256.0 | 512.0      | 2.0  | 16.0 | 2.0 | 131072.0 | 512.0  | 512.0  |
| 512.0  | 512.0 | 512.0      | 2.0  | 16.0 | 2.0 | 131072.0 | 512.0  | 512.0  |

|       |       |        |      |      |     |          |        |        |
|-------|-------|--------|------|------|-----|----------|--------|--------|
| 512.0 | 512.0 | 512.0  | 2.0  | 64.0 | 2.0 | 131072.0 | 512.0  | 512.0  |
| 256.0 | 256.0 | 1024.0 | 2.0  | 16.0 | 2.0 | 131072.0 | 512.0  | 512.0  |
| 512.0 | 512.0 | 512.0  | 2.0  | 32.0 | 2.0 | 131072.0 | 512.0  | 512.0  |
| 512.0 | 256.0 | 1024.0 | 2.0  | 16.0 | 4.0 | 131072.0 | 512.0  | 512.0  |
| 512.0 | 256.0 | 512.0  | 2.0  | 16.0 | 4.0 | 32768.0  | 512.0  | 512.0  |
| 512.0 | 256.0 | 1024.0 | 2.0  | 32.0 | 2.0 | 131072.0 | 512.0  | 512.0  |
| 512.0 | 512.0 | 1024.0 | 2.0  | 16.0 | 2.0 | 131072.0 | 512.0  | 512.0  |
| 512.0 | 512.0 | 2048.0 | 2.0  | 32.0 | 2.0 | 32768.0  | 512.0  | 512.0  |
| 256.0 | 256.0 | 1024.0 | 2.0  | 32.0 | 4.0 | 131072.0 | 512.0  | 512.0  |
| 512.0 | 256.0 | 512.0  | 2.0  | 16.0 | 2.0 | 262144.0 | 512.0  | 512.0  |
| 512.0 | 512.0 | 1024.0 | 2.0  | 16.0 | 2.0 | 131072.0 | 512.0  | 512.0  |
| 512.0 | 256.0 | 1024.0 | 2.0  | 32.0 | 2.0 | 32768.0  | 512.0  | 512.0  |
| 256.0 | 128.0 | 1024.0 | 1.0  | 32.0 | 1.0 | 16384.0  | 256.0  | 512.0  |
| 512.0 | 256.0 | 1024.0 | 2.0  | 32.0 | 2.0 | 131072.0 | 512.0  | 512.0  |
| 512.0 | 128.0 | 1024.0 | 2.0  | 32.0 | 4.0 | 65536.0  | 512.0  | 512.0  |
| 512.0 | 256.0 | 512.0  | 2.0  | 32.0 | 2.0 | 131072.0 | 512.0  | 512.0  |
| 256.0 | 256.0 | 1024.0 | 2.0  | 32.0 | 2.0 | 131072.0 | 512.0  | 512.0  |
| 512.0 | 256.0 | 1024.0 | 2.0  | 32.0 | 2.0 | 131072.0 | 512.0  | 512.0  |
| 512.0 | 256.0 | 512.0  | 2.0  | 32.0 | 2.0 | 131072.0 | 512.0  | 512.0  |
| 512.0 | 256.0 | 512.0  | 8.0  | 32.0 | 2.0 | 65536.0  | 1024.0 | 512.0  |
| 512.0 | 256.0 | 512.0  | 2.0  | 32.0 | 2.0 | 65536.0  | 512.0  | 512.0  |
| 512.0 | 256.0 | 1024.0 | 4.0  | 64.0 | 2.0 | 131072.0 | 512.0  | 512.0  |
| 256.0 | 256.0 | 512.0  | 4.0  | 32.0 | 8.0 | 65536.0  | 512.0  | 512.0  |
| 512.0 | 256.0 | 256.0  | 2.0  | 32.0 | 2.0 | 131072.0 | 1024.0 | 512.0  |
| 512.0 | 512.0 | 512.0  | 2.0  | 32.0 | 2.0 | 65536.0  | 1024.0 | 512.0  |
| 512.0 | 256.0 | 512.0  | 2.0  | 32.0 | 8.0 | 131072.0 | 512.0  | 512.0  |
| 512.0 | 256.0 | 512.0  | 16.0 | 64.0 | 2.0 | 131072.0 | 512.0  | 512.0  |
| 512.0 | 256.0 | 512.0  | 4.0  | 32.0 | 2.0 | 131072.0 | 512.0  | 512.0  |
| 512.0 | 256.0 | 1024.0 | 2.0  | 32.0 | 2.0 | 131072.0 | 512.0  | 512.0  |
| 512.0 | 256.0 | 512.0  | 2.0  | 32.0 | 2.0 | 131072.0 | 512.0  | 512.0  |
| 512.0 | 256.0 | 1024.0 | 2.0  | 32.0 | 4.0 | 131072.0 | 512.0  | 512.0  |
| 512.0 | 256.0 | 512.0  | 2.0  | 32.0 | 8.0 | 131072.0 | 512.0  | 512.0  |
| 512.0 | 512.0 | 1024.0 | 2.0  | 32.0 | 2.0 | 131072.0 | 512.0  | 512.0  |
| 512.0 | 256.0 | 512.0  | 2.0  | 32.0 | 2.0 | 131072.0 | 512.0  | 512.0  |
| 512.0 | 256.0 | 512.0  | 2.0  | 64.0 | 2.0 | 65536.0  | 512.0  | 512.0  |
| 512.0 | 256.0 | 512.0  | 2.0  | 32.0 | 2.0 | 131072.0 | 512.0  | 1024.0 |
| 256.0 | 256.0 | 512.0  | 2.0  | 32.0 | 2.0 | 131072.0 | 512.0  | 512.0  |
| 512.0 | 512.0 | 512.0  | 4.0  | 32.0 | 2.0 | 262144.0 | 512.0  | 512.0  |
| 512.0 | 256.0 | 512.0  | 2.0  | 32.0 | 2.0 | 131072.0 | 1024.0 | 512.0  |
| 512.0 | 512.0 | 1024.0 | 2.0  | 32.0 | 2.0 | 131072.0 | 512.0  | 512.0  |
| 512.0 | 512.0 | 512.0  | 2.0  | 32.0 | 2.0 | 131072.0 | 512.0  | 512.0  |
| 512.0 | 256.0 | 256.0  | 2.0  | 32.0 | 2.0 | 131072.0 | 512.0  | 1024.0 |
| 512.0 | 512.0 | 512.0  | 4.0  | 32.0 | 2.0 | 131072.0 | 1024.0 | 512.0  |
| 512.0 | 512.0 | 512.0  | 4.0  | 32.0 | 2.0 | 131072.0 | 512.0  | 1024.0 |
| 512.0 | 256.0 | 512.0  | 4.0  | 32.0 | 2.0 | 131072.0 | 512.0  | 512.0  |
| 512.0 | 256.0 | 512.0  | 2.0  | 32.0 | 2.0 | 131072.0 | 512.0  | 512.0  |
| 512.0 | 256.0 | 512.0  | 2.0  | 16.0 | 2.0 | 131072.0 | 512.0  | 512.0  |
| 512.0 | 256.0 | 512.0  | 2.0  | 32.0 | 2.0 | 65536.0  | 512.0  | 512.0  |
| 512.0 | 256.0 | 256.0  | 2.0  | 32.0 | 2.0 | 65536.0  | 1024.0 | 512.0  |
| 512.0 | 256.0 | 256.0  | 2.0  | 32.0 | 2.0 | 262144.0 | 1024.0 | 512.0  |
| 512.0 | 512.0 | 512.0  | 2.0  | 32.0 | 2.0 | 131072.0 | 512.0  | 512.0  |

|        |       |        |     |       |     |          |        |       |
|--------|-------|--------|-----|-------|-----|----------|--------|-------|
| 512.0  | 256.0 | 512.0  | 1.0 | 64.0  | 2.0 | 131072.0 | 512.0  | 512.0 |
| 512.0  | 256.0 | 512.0  | 1.0 | 32.0  | 2.0 | 262144.0 | 512.0  | 512.0 |
| 256.0  | 256.0 | 512.0  | 2.0 | 32.0  | 2.0 | 262144.0 | 512.0  | 512.0 |
| 512.0  | 256.0 | 512.0  | 1.0 | 32.0  | 2.0 | 262144.0 | 512.0  | 512.0 |
| 1024.0 | 256.0 | 512.0  | 1.0 | 32.0  | 2.0 | 131072.0 | 1024.0 | 512.0 |
| 512.0  | 256.0 | 512.0  | 1.0 | 16.0  | 2.0 | 262144.0 | 512.0  | 512.0 |
| 512.0  | 256.0 | 512.0  | 1.0 | 64.0  | 2.0 | 262144.0 | 512.0  | 512.0 |
| 512.0  | 256.0 | 512.0  | 1.0 | 32.0  | 2.0 | 131072.0 | 512.0  | 512.0 |
| 512.0  | 256.0 | 512.0  | 1.0 | 32.0  | 2.0 | 262144.0 | 512.0  | 512.0 |
| 512.0  | 512.0 | 512.0  | 1.0 | 16.0  | 2.0 | 262144.0 | 512.0  | 512.0 |
| 512.0  | 512.0 | 512.0  | 1.0 | 32.0  | 2.0 | 131072.0 | 512.0  | 512.0 |
| 512.0  | 256.0 | 512.0  | 1.0 | 32.0  | 2.0 | 131072.0 | 512.0  | 512.0 |
| 512.0  | 256.0 | 512.0  | 1.0 | 64.0  | 8.0 | 262144.0 | 512.0  | 512.0 |
| 512.0  | 256.0 | 512.0  | 1.0 | 32.0  | 2.0 | 262144.0 | 1024.0 | 512.0 |
| 512.0  | 256.0 | 512.0  | 2.0 | 64.0  | 2.0 | 262144.0 | 512.0  | 512.0 |
| 512.0  | 512.0 | 512.0  | 1.0 | 32.0  | 2.0 | 262144.0 | 512.0  | 512.0 |
| 512.0  | 512.0 | 512.0  | 1.0 | 32.0  | 2.0 | 262144.0 | 512.0  | 512.0 |
| 512.0  | 256.0 | 512.0  | 1.0 | 64.0  | 4.0 | 262144.0 | 512.0  | 512.0 |
| 256.0  | 256.0 | 512.0  | 0.5 | 32.0  | 2.0 | 262144.0 | 512.0  | 512.0 |
| 512.0  | 256.0 | 512.0  | 1.0 | 32.0  | 4.0 | 131072.0 | 512.0  | 512.0 |
| 512.0  | 512.0 | 512.0  | 2.0 | 32.0  | 2.0 | 131072.0 | 512.0  | 512.0 |
| 512.0  | 256.0 | 512.0  | 2.0 | 32.0  | 2.0 | 32768.0  | 512.0  | 512.0 |
| 512.0  | 256.0 | 1024.0 | 4.0 | 32.0  | 4.0 | 65536.0  | 512.0  | 512.0 |
| 512.0  | 256.0 | 512.0  | 1.0 | 64.0  | 2.0 | 131072.0 | 512.0  | 512.0 |
| 512.0  | 256.0 | 256.0  | 1.0 | 32.0  | 2.0 | 65536.0  | 512.0  | 512.0 |
| 256.0  | 256.0 | 512.0  | 0.5 | 32.0  | 4.0 | 131072.0 | 512.0  | 512.0 |
| 512.0  | 256.0 | 256.0  | 1.0 | 32.0  | 2.0 | 131072.0 | 512.0  | 512.0 |
| 256.0  | 256.0 | 512.0  | 1.0 | 32.0  | 2.0 | 131072.0 | 512.0  | 512.0 |
| 512.0  | 512.0 | 512.0  | 0.5 | 32.0  | 2.0 | 131072.0 | 512.0  | 512.0 |
| 512.0  | 512.0 | 512.0  | 1.0 | 32.0  | 2.0 | 131072.0 | 512.0  | 512.0 |
| 512.0  | 512.0 | 512.0  | 0.5 | 32.0  | 2.0 | 131072.0 | 1024.0 | 512.0 |
| 512.0  | 512.0 | 512.0  | 2.0 | 64.0  | 4.0 | 262144.0 | 1024.0 | 512.0 |
| 256.0  | 256.0 | 512.0  | 0.5 | 32.0  | 2.0 | 131072.0 | 512.0  | 512.0 |
| 512.0  | 256.0 | 512.0  | 4.0 | 32.0  | 4.0 | 65536.0  | 512.0  | 512.0 |
| 512.0  | 512.0 | 512.0  | 0.5 | 128.0 | 2.0 | 131072.0 | 512.0  | 512.0 |
| 512.0  | 256.0 | 512.0  | 2.0 | 32.0  | 2.0 | 131072.0 | 512.0  | 512.0 |
| 256.0  | 256.0 | 512.0  | 1.0 | 32.0  | 2.0 | 131072.0 | 512.0  | 512.0 |
| 512.0  | 512.0 | 512.0  | 1.0 | 32.0  | 4.0 | 65536.0  | 512.0  | 512.0 |
| 512.0  | 256.0 | 512.0  | 1.0 | 32.0  | 2.0 | 131072.0 | 1024.0 | 512.0 |
| 512.0  | 256.0 | 512.0  | 1.0 | 32.0  | 8.0 | 262144.0 | 512.0  | 512.0 |
| 512.0  | 256.0 | 512.0  | 1.0 | 32.0  | 2.0 | 131072.0 | 512.0  | 512.0 |
| 512.0  | 256.0 | 512.0  | 1.0 | 32.0  | 2.0 | 131072.0 | 512.0  | 512.0 |
| 512.0  | 256.0 | 512.0  | 1.0 | 32.0  | 2.0 | 65536.0  | 512.0  | 512.0 |
| 512.0  | 256.0 | 512.0  | 1.0 | 64.0  | 2.0 | 131072.0 | 1024.0 | 512.0 |
| 512.0  | 256.0 | 512.0  | 1.0 | 16.0  | 2.0 | 131072.0 | 512.0  | 512.0 |
| 512.0  | 256.0 | 512.0  | 1.0 | 64.0  | 2.0 | 131072.0 | 512.0  | 512.0 |
| 512.0  | 256.0 | 512.0  | 1.0 | 128.0 | 2.0 | 262144.0 | 512.0  | 512.0 |
| 512.0  | 256.0 | 512.0  | 2.0 | 64.0  | 2.0 | 65536.0  | 512.0  | 512.0 |
| 512.0  | 512.0 | 512.0  | 1.0 | 64.0  | 4.0 | 131072.0 | 512.0  | 512.0 |
| 512.0  | 512.0 | 512.0  | 2.0 | 32.0  | 2.0 | 131072.0 | 512.0  | 512.0 |
| 512.0  | 256.0 | 512.0  | 1.0 | 32.0  | 8.0 | 65536.0  | 512.0  | 512.0 |

|        |       |        |     |      |     |          |        |        |
|--------|-------|--------|-----|------|-----|----------|--------|--------|
| 512.0  | 256.0 | 512.0  | 1.0 | 32.0 | 8.0 | 262144.0 | 512.0  | 512.0  |
| 512.0  | 512.0 | 512.0  | 1.0 | 64.0 | 2.0 | 131072.0 | 512.0  | 512.0  |
| 512.0  | 256.0 | 512.0  | 1.0 | 32.0 | 4.0 | 262144.0 | 512.0  | 512.0  |
| 512.0  | 256.0 | 512.0  | 2.0 | 32.0 | 2.0 | 131072.0 | 512.0  | 512.0  |
| 512.0  | 512.0 | 256.0  | 1.0 | 64.0 | 4.0 | 131072.0 | 512.0  | 512.0  |
| 512.0  | 256.0 | 512.0  | 1.0 | 32.0 | 4.0 | 131072.0 | 512.0  | 512.0  |
| 256.0  | 256.0 | 512.0  | 2.0 | 32.0 | 2.0 | 131072.0 | 512.0  | 512.0  |
| 256.0  | 256.0 | 512.0  | 4.0 | 16.0 | 2.0 | 131072.0 | 512.0  | 512.0  |
| 512.0  | 256.0 | 512.0  | 4.0 | 32.0 | 2.0 | 131072.0 | 1024.0 | 512.0  |
| 512.0  | 512.0 | 512.0  | 2.0 | 32.0 | 2.0 | 131072.0 | 512.0  | 512.0  |
| 512.0  | 256.0 | 512.0  | 4.0 | 32.0 | 2.0 | 131072.0 | 512.0  | 512.0  |
| 512.0  | 512.0 | 512.0  | 2.0 | 32.0 | 2.0 | 65536.0  | 512.0  | 512.0  |
| 512.0  | 256.0 | 512.0  | 2.0 | 32.0 | 2.0 | 131072.0 | 1024.0 | 512.0  |
| 256.0  | 256.0 | 512.0  | 2.0 | 64.0 | 2.0 | 131072.0 | 512.0  | 512.0  |
| 256.0  | 256.0 | 512.0  | 2.0 | 32.0 | 2.0 | 131072.0 | 512.0  | 512.0  |
| 256.0  | 256.0 | 512.0  | 2.0 | 32.0 | 2.0 | 131072.0 | 512.0  | 512.0  |
| 512.0  | 512.0 | 512.0  | 2.0 | 32.0 | 2.0 | 131072.0 | 512.0  | 512.0  |
| 256.0  | 256.0 | 1024.0 | 2.0 | 32.0 | 2.0 | 65536.0  | 512.0  | 512.0  |
| 512.0  | 256.0 | 512.0  | 2.0 | 32.0 | 2.0 | 65536.0  | 512.0  | 512.0  |
| 256.0  | 256.0 | 1024.0 | 2.0 | 32.0 | 2.0 | 131072.0 | 512.0  | 512.0  |
| 512.0  | 512.0 | 256.0  | 2.0 | 16.0 | 2.0 | 131072.0 | 512.0  | 512.0  |
| 512.0  | 512.0 | 512.0  | 2.0 | 64.0 | 2.0 | 65536.0  | 512.0  | 512.0  |
| 512.0  | 256.0 | 512.0  | 2.0 | 32.0 | 2.0 | 131072.0 | 512.0  | 512.0  |
| 256.0  | 256.0 | 512.0  | 2.0 | 64.0 | 8.0 | 131072.0 | 512.0  | 512.0  |
| 256.0  | 256.0 | 512.0  | 2.0 | 32.0 | 2.0 | 65536.0  | 512.0  | 512.0  |
| 512.0  | 256.0 | 512.0  | 2.0 | 64.0 | 2.0 | 131072.0 | 512.0  | 512.0  |
| 256.0  | 256.0 | 512.0  | 2.0 | 16.0 | 2.0 | 32768.0  | 512.0  | 512.0  |
| 512.0  | 256.0 | 512.0  | 2.0 | 16.0 | 2.0 | 131072.0 | 512.0  | 512.0  |
| 512.0  | 256.0 | 512.0  | 2.0 | 32.0 | 2.0 | 131072.0 | 512.0  | 512.0  |
| 256.0  | 256.0 | 512.0  | 2.0 | 32.0 | 2.0 | 131072.0 | 512.0  | 512.0  |
| 512.0  | 256.0 | 512.0  | 2.0 | 32.0 | 2.0 | 131072.0 | 512.0  | 512.0  |
| 512.0  | 256.0 | 512.0  | 2.0 | 32.0 | 2.0 | 131072.0 | 1024.0 | 512.0  |
| 512.0  | 512.0 | 512.0  | 2.0 | 32.0 | 2.0 | 131072.0 | 512.0  | 512.0  |
| 512.0  | 256.0 | 512.0  | 2.0 | 32.0 | 2.0 | 32768.0  | 512.0  | 512.0  |
| 512.0  | 256.0 | 512.0  | 2.0 | 32.0 | 2.0 | 131072.0 | 512.0  | 512.0  |
| 512.0  | 256.0 | 512.0  | 4.0 | 32.0 | 2.0 | 65536.0  | 512.0  | 512.0  |
| 512.0  | 256.0 | 512.0  | 2.0 | 32.0 | 2.0 | 131072.0 | 1024.0 | 512.0  |
| 512.0  | 256.0 | 512.0  | 2.0 | 32.0 | 2.0 | 131072.0 | 512.0  | 512.0  |
| 512.0  | 256.0 | 512.0  | 2.0 | 32.0 | 2.0 | 131072.0 | 512.0  | 512.0  |
| 512.0  | 256.0 | 512.0  | 4.0 | 32.0 | 2.0 | 131072.0 | 512.0  | 512.0  |
| 512.0  | 256.0 | 512.0  | 2.0 | 32.0 | 2.0 | 65536.0  | 512.0  | 512.0  |
| 512.0  | 512.0 | 256.0  | 2.0 | 32.0 | 4.0 | 131072.0 | 512.0  | 512.0  |
| 256.0  | 256.0 | 512.0  | 2.0 | 32.0 | 4.0 | 131072.0 | 512.0  | 512.0  |
| 512.0  | 256.0 | 512.0  | 2.0 | 32.0 | 2.0 | 32768.0  | 512.0  | 512.0  |
| 1024.0 | 256.0 | 512.0  | 2.0 | 32.0 | 2.0 | 65536.0  | 1024.0 | 512.0  |
| 1024.0 | 256.0 | 256.0  | 2.0 | 32.0 | 1.0 | 131072.0 | 1024.0 | 512.0  |
| 1024.0 | 256.0 | 512.0  | 2.0 | 32.0 | 2.0 | 131072.0 | 1024.0 | 512.0  |
| 512.0  | 512.0 | 512.0  | 2.0 | 32.0 | 2.0 | 131072.0 | 512.0  | 512.0  |
| 256.0  | 256.0 | 512.0  | 4.0 | 16.0 | 2.0 | 65536.0  | 512.0  | 512.0  |
| 512.0  | 512.0 | 512.0  | 2.0 | 32.0 | 2.0 | 131072.0 | 512.0  | 1024.0 |
| 512.0  | 512.0 | 512.0  | 2.0 | 32.0 | 2.0 | 131072.0 | 512.0  | 512.0  |

|        |        |        |      |      |     |          |        |        |
|--------|--------|--------|------|------|-----|----------|--------|--------|
| 512.0  | 512.0  | 512.0  | 2.0  | 32.0 | 2.0 | 131072.0 | 512.0  | 512.0  |
| 512.0  | 256.0  | 512.0  | 4.0  | 64.0 | 2.0 | 131072.0 | 512.0  | 512.0  |
| 512.0  | 256.0  | 1024.0 | 2.0  | 64.0 | 2.0 | 131072.0 | 512.0  | 512.0  |
| 512.0  | 512.0  | 512.0  | 2.0  | 32.0 | 2.0 | 131072.0 | 512.0  | 512.0  |
| 1024.0 | 512.0  | 256.0  | 2.0  | 32.0 | 2.0 | 65536.0  | 1024.0 | 512.0  |
| 512.0  | 1024.0 | 512.0  | 2.0  | 64.0 | 4.0 | 131072.0 | 512.0  | 1024.0 |
| 512.0  | 256.0  | 512.0  | 2.0  | 32.0 | 2.0 | 65536.0  | 512.0  | 512.0  |
| 512.0  | 256.0  | 512.0  | 2.0  | 32.0 | 2.0 | 65536.0  | 1024.0 | 512.0  |
| 256.0  | 256.0  | 512.0  | 2.0  | 32.0 | 8.0 | 131072.0 | 512.0  | 512.0  |
| 512.0  | 512.0  | 512.0  | 2.0  | 32.0 | 2.0 | 131072.0 | 512.0  | 512.0  |
| 512.0  | 256.0  | 512.0  | 16.0 | 32.0 | 2.0 | 262144.0 | 1024.0 | 512.0  |
| 512.0  | 512.0  | 512.0  | 2.0  | 32.0 | 2.0 | 131072.0 | 512.0  | 512.0  |
| 512.0  | 256.0  | 512.0  | 2.0  | 64.0 | 2.0 | 131072.0 | 512.0  | 512.0  |
| 512.0  | 512.0  | 512.0  | 4.0  | 32.0 | 4.0 | 65536.0  | 512.0  | 512.0  |
| 512.0  | 512.0  | 512.0  | 2.0  | 16.0 | 2.0 | 131072.0 | 512.0  | 512.0  |
| 512.0  | 512.0  | 1024.0 | 2.0  | 32.0 | 2.0 | 131072.0 | 512.0  | 512.0  |
| 512.0  | 512.0  | 512.0  | 2.0  | 32.0 | 8.0 | 131072.0 | 512.0  | 512.0  |
| 512.0  | 256.0  | 512.0  | 2.0  | 64.0 | 2.0 | 65536.0  | 512.0  | 512.0  |
| 256.0  | 512.0  | 1024.0 | 4.0  | 64.0 | 8.0 | 131072.0 | 512.0  | 512.0  |
| 512.0  | 256.0  | 512.0  | 4.0  | 32.0 | 4.0 | 65536.0  | 512.0  | 512.0  |
| 512.0  | 256.0  | 512.0  | 2.0  | 64.0 | 2.0 | 65536.0  | 512.0  | 512.0  |
| 512.0  | 256.0  | 512.0  | 2.0  | 32.0 | 2.0 | 65536.0  | 512.0  | 512.0  |
| 512.0  | 256.0  | 512.0  | 4.0  | 64.0 | 2.0 | 262144.0 | 512.0  | 256.0  |
| 512.0  | 256.0  | 512.0  | 2.0  | 32.0 | 2.0 | 131072.0 | 512.0  | 512.0  |
| 256.0  | 512.0  | 512.0  | 2.0  | 64.0 | 2.0 | 131072.0 | 512.0  | 512.0  |
| 512.0  | 512.0  | 512.0  | 2.0  | 32.0 | 2.0 | 131072.0 | 512.0  | 1024.0 |
| 1024.0 | 256.0  | 512.0  | 1.0  | 32.0 | 2.0 | 131072.0 | 1024.0 | 512.0  |
| 512.0  | 512.0  | 512.0  | 2.0  | 32.0 | 2.0 | 131072.0 | 512.0  | 512.0  |
| 512.0  | 512.0  | 512.0  | 4.0  | 32.0 | 2.0 | 32768.0  | 512.0  | 1024.0 |
| 512.0  | 512.0  | 256.0  | 2.0  | 32.0 | 2.0 | 131072.0 | 512.0  | 512.0  |
| 512.0  | 512.0  | 512.0  | 2.0  | 32.0 | 2.0 | 131072.0 | 512.0  | 512.0  |
| 512.0  | 512.0  | 512.0  | 2.0  | 64.0 | 2.0 | 131072.0 | 512.0  | 512.0  |
| 256.0  | 512.0  | 512.0  | 2.0  | 16.0 | 2.0 | 131072.0 | 512.0  | 1024.0 |
| 256.0  | 256.0  | 512.0  | 4.0  | 32.0 | 2.0 | 65536.0  | 512.0  | 512.0  |
| 256.0  | 512.0  | 512.0  | 2.0  | 32.0 | 2.0 | 131072.0 | 512.0  | 1024.0 |
| 512.0  | 512.0  | 512.0  | 2.0  | 64.0 | 2.0 | 131072.0 | 512.0  | 1024.0 |
| 512.0  | 512.0  | 512.0  | 2.0  | 32.0 | 4.0 | 131072.0 | 512.0  | 1024.0 |
| 512.0  | 512.0  | 512.0  | 2.0  | 32.0 | 2.0 | 65536.0  | 512.0  | 512.0  |
| 512.0  | 512.0  | 512.0  | 2.0  | 32.0 | 2.0 | 131072.0 | 512.0  | 512.0  |
| 256.0  | 256.0  | 256.0  | 4.0  | 32.0 | 2.0 | 131072.0 | 512.0  | 512.0  |
| 256.0  | 256.0  | 512.0  | 2.0  | 32.0 | 2.0 | 131072.0 | 512.0  | 512.0  |
| 512.0  | 256.0  | 512.0  | 2.0  | 16.0 | 1.0 | 131072.0 | 512.0  | 512.0  |
| 512.0  | 256.0  | 256.0  | 2.0  | 16.0 | 2.0 | 131072.0 | 512.0  | 512.0  |
| 512.0  | 256.0  | 512.0  | 2.0  | 16.0 | 2.0 | 65536.0  | 512.0  | 512.0  |
| 512.0  | 256.0  | 512.0  | 2.0  | 64.0 | 2.0 | 131072.0 | 512.0  | 512.0  |
| 512.0  | 256.0  | 512.0  | 8.0  | 32.0 | 2.0 | 131072.0 | 512.0  | 512.0  |
| 256.0  | 256.0  | 512.0  | 2.0  | 64.0 | 2.0 | 131072.0 | 512.0  | 512.0  |
| 256.0  | 256.0  | 512.0  | 2.0  | 16.0 | 1.0 | 65536.0  | 512.0  | 512.0  |
| 512.0  | 256.0  | 512.0  | 8.0  | 32.0 | 2.0 | 32768.0  | 512.0  | 512.0  |
| 512.0  | 512.0  | 512.0  | 2.0  | 32.0 | 4.0 | 65536.0  | 512.0  | 512.0  |

|        |       |        |     |      |     |          |        |        |
|--------|-------|--------|-----|------|-----|----------|--------|--------|
| 512.0  | 256.0 | 512.0  | 4.0 | 32.0 | 4.0 | 131072.0 | 512.0  | 512.0  |
| 512.0  | 256.0 | 512.0  | 2.0 | 32.0 | 2.0 | 65536.0  | 1024.0 | 1024.0 |
| 512.0  | 512.0 | 512.0  | 2.0 | 32.0 | 2.0 | 131072.0 | 512.0  | 512.0  |
| 512.0  | 256.0 | 512.0  | 4.0 | 32.0 | 2.0 | 131072.0 | 512.0  | 512.0  |
| 256.0  | 256.0 | 512.0  | 4.0 | 32.0 | 2.0 | 131072.0 | 512.0  | 512.0  |
| 1024.0 | 256.0 | 256.0  | 4.0 | 32.0 | 2.0 |          | 2048.0 | 512.0  |
| 256.0  | 256.0 | 512.0  | 2.0 | 16.0 | 2.0 | 32768.0  | 512.0  | 512.0  |
| 512.0  | 256.0 | 512.0  | 1.0 | 16.0 | 2.0 | 131072.0 | 512.0  | 512.0  |
| 512.0  | 256.0 | 1024.0 | 2.0 | 32.0 | 2.0 | 131072.0 | 512.0  | 512.0  |
| 512.0  | 256.0 | 512.0  | 2.0 | 32.0 | 2.0 | 131072.0 | 512.0  | 512.0  |
| 256.0  | 256.0 | 512.0  | 2.0 | 32.0 | 2.0 | 131072.0 | 512.0  | 512.0  |
| 512.0  | 512.0 | 512.0  | 2.0 | 32.0 | 2.0 | 65536.0  | 512.0  | 512.0  |
| 512.0  | 256.0 | 512.0  | 1.0 | 32.0 | 2.0 | 131072.0 | 1024.0 | 512.0  |
| 512.0  | 512.0 | 512.0  | 1.0 | 32.0 | 2.0 | 131072.0 | 512.0  | 512.0  |
| 512.0  | 512.0 | 512.0  | 1.0 | 32.0 | 2.0 | 131072.0 | 512.0  | 512.0  |
| 512.0  | 256.0 | 512.0  | 1.0 | 16.0 | 4.0 | 131072.0 | 512.0  | 512.0  |
| 512.0  | 256.0 | 512.0  | 2.0 | 32.0 | 2.0 | 131072.0 | 512.0  | 512.0  |
| 512.0  | 256.0 | 512.0  | 1.0 | 32.0 | 4.0 | 131072.0 | 512.0  | 512.0  |
| 512.0  | 256.0 | 256.0  | 2.0 | 32.0 | 2.0 | 131072.0 | 1024.0 | 512.0  |
| 512.0  | 256.0 | 256.0  | 1.0 | 16.0 | 2.0 | 131072.0 | 512.0  | 512.0  |
| 512.0  | 512.0 | 512.0  | 2.0 | 64.0 | 2.0 | 131072.0 | 512.0  | 512.0  |
| 512.0  | 512.0 | 512.0  | 2.0 | 32.0 | 2.0 | 131072.0 | 512.0  | 512.0  |
| 512.0  | 256.0 | 512.0  | 1.0 | 32.0 | 4.0 | 131072.0 | 512.0  | 512.0  |
| 512.0  | 256.0 | 512.0  | 2.0 | 16.0 | 2.0 | 131072.0 | 512.0  | 512.0  |
| 512.0  | 512.0 | 512.0  | 2.0 | 32.0 | 2.0 | 131072.0 | 512.0  | 512.0  |
| 512.0  | 256.0 | 512.0  | 2.0 | 32.0 | 2.0 | 131072.0 | 512.0  | 512.0  |
| 512.0  | 256.0 | 512.0  | 2.0 | 64.0 | 2.0 | 131072.0 | 1024.0 | 512.0  |
| 512.0  | 512.0 | 512.0  | 2.0 | 32.0 | 2.0 | 131072.0 | 512.0  | 512.0  |
| 512.0  | 512.0 | 512.0  | 1.0 | 32.0 | 2.0 | 131072.0 | 512.0  | 512.0  |
| 512.0  | 256.0 | 512.0  | 1.0 | 32.0 | 2.0 | 131072.0 | 512.0  | 512.0  |
| 256.0  | 256.0 | 512.0  | 1.0 | 32.0 | 2.0 | 131072.0 | 512.0  | 512.0  |
| 256.0  | 256.0 | 512.0  | 2.0 | 32.0 | 2.0 | 131072.0 | 512.0  | 512.0  |
| 512.0  | 256.0 | 512.0  | 1.0 | 32.0 | 2.0 | 131072.0 | 512.0  | 512.0  |
| 512.0  | 256.0 | 512.0  | 1.0 | 32.0 | 2.0 | 131072.0 | 512.0  | 512.0  |
| 512.0  | 512.0 | 512.0  | 2.0 | 32.0 | 2.0 | 131072.0 | 512.0  | 512.0  |
| 256.0  | 256.0 | 512.0  | 2.0 | 32.0 | 2.0 | 131072.0 | 512.0  | 512.0  |
| 512.0  | 256.0 | 512.0  | 1.0 | 32.0 | 2.0 | 131072.0 | 512.0  | 512.0  |
| 512.0  | 256.0 | 512.0  | 8.0 | 32.0 | 2.0 | 131072.0 | 512.0  | 512.0  |
| 256.0  | 256.0 | 512.0  | 2.0 | 32.0 | 4.0 | 131072.0 | 512.0  | 512.0  |
| 256.0  | 256.0 | 512.0  | 1.0 | 32.0 | 2.0 | 131072.0 | 512.0  | 512.0  |
| 512.0  | 256.0 | 256.0  | 1.0 | 32.0 | 2.0 | 32768.0  | 512.0  | 512.0  |
| 512.0  | 256.0 | 512.0  | 2.0 | 32.0 | 2.0 | 131072.0 | 512.0  | 512.0  |
| 512.0  | 256.0 | 256.0  | 1.0 | 32.0 | 2.0 | 131072.0 | 512.0  | 512.0  |
| 512.0  | 256.0 | 512.0  | 1.0 | 32.0 | 2.0 | 131072.0 | 512.0  | 512.0  |
| 512.0  | 256.0 | 512.0  | 1.0 | 32.0 | 2.0 | 131072.0 | 512.0  | 512.0  |
| 512.0  | 256.0 | 512.0  | 1.0 | 16.0 | 2.0 | 131072.0 | 512.0  | 512.0  |
| 512.0  | 512.0 | 512.0  | 8.0 | 32.0 | 2.0 | 131072.0 | 512.0  | 512.0  |
| 512.0  | 256.0 | 512.0  | 1.0 | 16.0 | 2.0 | 131072.0 | 512.0  | 512.0  |
| 512.0  | 256.0 | 512.0  | 2.0 | 32.0 | 2.0 | 131072.0 | 512.0  | 512.0  |
| 512.0  | 512.0 | 512.0  | 1.0 | 32.0 | 2.0 | 131072.0 | 512.0  | 512.0  |
| 512.0  | 256.0 | 1024.0 | 2.0 | 32.0 | 2.0 | 262144.0 | 512.0  | 512.0  |

|       |       |        |      |      |     |          |        |        |
|-------|-------|--------|------|------|-----|----------|--------|--------|
| 512.0 | 256.0 | 1024.0 | 2.0  | 32.0 | 2.0 | 131072.0 | 512.0  | 512.0  |
| 512.0 | 256.0 | 512.0  | 2.0  | 32.0 | 2.0 | 65536.0  | 512.0  | 512.0  |
| 512.0 | 256.0 | 1024.0 | 2.0  | 32.0 | 2.0 | 131072.0 | 512.0  | 512.0  |
| 512.0 | 256.0 | 512.0  | 2.0  | 64.0 | 2.0 | 131072.0 | 512.0  | 512.0  |
| 512.0 | 256.0 | 512.0  | 2.0  | 32.0 | 2.0 | 65536.0  | 512.0  | 512.0  |
| 512.0 | 256.0 | 512.0  | 2.0  | 32.0 | 2.0 | 131072.0 | 512.0  | 512.0  |
| 512.0 | 256.0 | 512.0  | 1.0  | 16.0 | 2.0 | 131072.0 | 512.0  | 512.0  |
| 512.0 | 256.0 | 512.0  | 2.0  | 64.0 | 2.0 | 131072.0 | 512.0  | 512.0  |
| 512.0 | 256.0 | 512.0  | 2.0  | 32.0 | 2.0 | 131072.0 | 512.0  | 512.0  |
| 512.0 | 256.0 | 512.0  | 2.0  | 32.0 | 4.0 | 131072.0 | 512.0  | 512.0  |
| 512.0 | 256.0 | 512.0  | 8.0  | 32.0 | 4.0 | 131072.0 | 512.0  | 512.0  |
| 512.0 | 256.0 | 512.0  | 2.0  | 64.0 | 4.0 | 65536.0  | 512.0  | 512.0  |
| 512.0 | 512.0 | 512.0  | 2.0  | 32.0 | 2.0 | 65536.0  | 512.0  | 512.0  |
| 512.0 | 512.0 | 512.0  | 2.0  | 32.0 | 2.0 | 65536.0  | 512.0  | 512.0  |
| 512.0 | 512.0 | 512.0  | 32.0 | 32.0 | 2.0 | 131072.0 | 512.0  | 512.0  |
| 512.0 | 512.0 | 512.0  | 4.0  | 64.0 | 8.0 | 131072.0 | 512.0  | 512.0  |
| 512.0 | 512.0 | 512.0  | 2.0  | 32.0 | 4.0 | 131072.0 | 512.0  | 512.0  |
| 512.0 | 256.0 | 512.0  | 2.0  | 16.0 | 2.0 | 131072.0 | 512.0  | 512.0  |
| 512.0 | 256.0 | 512.0  | 1.0  | 64.0 | 2.0 | 131072.0 | 512.0  | 256.0  |
| 512.0 | 512.0 | 1024.0 | 2.0  | 32.0 | 8.0 | 131072.0 | 512.0  | 512.0  |
| 512.0 | 256.0 | 1024.0 | 2.0  | 32.0 | 2.0 | 131072.0 | 512.0  | 512.0  |
| 512.0 | 512.0 | 512.0  | 4.0  | 32.0 | 8.0 | 131072.0 | 512.0  | 512.0  |
| 512.0 | 256.0 | 512.0  | 4.0  | 32.0 | 2.0 | 131072.0 | 1024.0 | 512.0  |
| 512.0 | 512.0 | 512.0  | 4.0  | 32.0 | 2.0 | 32768.0  | 512.0  | 512.0  |
| 256.0 | 256.0 | 512.0  | 1.0  | 16.0 | 2.0 | 131072.0 | 512.0  | 512.0  |
| 512.0 | 256.0 | 512.0  | 4.0  | 32.0 | 2.0 | 131072.0 | 1024.0 | 256.0  |
| 512.0 | 256.0 | 512.0  | 2.0  | 32.0 | 2.0 | 65536.0  | 512.0  | 512.0  |
| 512.0 | 256.0 | 512.0  | 4.0  | 16.0 | 4.0 | 65536.0  | 512.0  | 512.0  |
| 512.0 | 256.0 | 512.0  | 2.0  | 16.0 | 2.0 | 131072.0 | 512.0  | 512.0  |
| 512.0 | 256.0 | 512.0  | 2.0  | 32.0 | 2.0 | 131072.0 | 512.0  | 512.0  |
| 512.0 | 512.0 | 512.0  | 2.0  | 32.0 | 2.0 | 131072.0 | 512.0  | 512.0  |
| 512.0 | 256.0 | 512.0  | 4.0  | 32.0 | 2.0 | 131072.0 | 512.0  | 512.0  |
| 512.0 | 256.0 | 512.0  | 2.0  | 16.0 | 2.0 | 65536.0  | 512.0  | 512.0  |
| 512.0 | 256.0 | 512.0  | 4.0  | 32.0 | 2.0 | 131072.0 | 512.0  | 512.0  |
| 512.0 | 256.0 | 512.0  | 2.0  | 16.0 | 2.0 | 131072.0 | 512.0  | 1024.0 |
| 512.0 | 512.0 | 512.0  | 2.0  | 32.0 | 2.0 | 131072.0 | 512.0  | 512.0  |
| 512.0 | 256.0 | 512.0  | 2.0  | 16.0 | 2.0 | 131072.0 | 512.0  | 512.0  |
| 512.0 | 256.0 | 1024.0 | 2.0  | 16.0 | 2.0 | 131072.0 | 512.0  | 512.0  |
| 512.0 | 256.0 | 1024.0 | 8.0  | 64.0 | 2.0 | 65536.0  | 512.0  | 512.0  |
| 512.0 | 512.0 | 512.0  | 2.0  | 64.0 | 2.0 | 131072.0 | 512.0  | 512.0  |
| 256.0 | 256.0 | 512.0  | 4.0  | 16.0 | 2.0 | 32768.0  | 512.0  | 512.0  |
| 512.0 | 256.0 | 512.0  | 2.0  | 32.0 | 2.0 | 131072.0 | 512.0  | 512.0  |
| 512.0 | 256.0 | 512.0  | 2.0  | 16.0 | 2.0 | 131072.0 | 512.0  | 512.0  |
| 512.0 | 256.0 | 512.0  | 8.0  | 32.0 | 2.0 | 131072.0 | 512.0  | 512.0  |
| 512.0 | 256.0 | 512.0  | 2.0  | 32.0 | 2.0 | 131072.0 | 512.0  | 512.0  |
| 256.0 | 128.0 | 512.0  | 2.0  | 8.0  | 4.0 | 32768.0  | 512.0  | 128.0  |
| 512.0 | 256.0 | 256.0  | 2.0  | 32.0 | 2.0 | 131072.0 | 512.0  | 512.0  |
| 512.0 | 256.0 | 512.0  | 2.0  | 16.0 | 2.0 | 131072.0 | 512.0  | 512.0  |
| 512.0 | 256.0 | 512.0  | 4.0  | 32.0 | 2.0 | 131072.0 | 512.0  | 512.0  |
| 512.0 | 256.0 | 512.0  | 4.0  | 32.0 | 2.0 | 131072.0 | 512.0  | 512.0  |
| 512.0 | 256.0 | 512.0  | 4.0  | 16.0 | 2.0 | 131072.0 | 512.0  | 512.0  |

|       |       |        |     |       |     |          |        |        |
|-------|-------|--------|-----|-------|-----|----------|--------|--------|
| 512.0 | 256.0 | 512.0  | 2.0 | 16.0  | 2.0 | 65536.0  | 1024.0 | 512.0  |
| 512.0 | 256.0 | 512.0  | 2.0 | 16.0  | 2.0 | 131072.0 | 512.0  | 512.0  |
| 512.0 | 256.0 | 512.0  | 2.0 | 16.0  | 2.0 | 131072.0 | 1024.0 | 512.0  |
| 512.0 | 512.0 | 1024.0 | 4.0 | 32.0  | 2.0 | 131072.0 | 512.0  | 512.0  |
| 512.0 | 256.0 | 512.0  | 2.0 | 16.0  | 2.0 | 131072.0 | 512.0  | 512.0  |
| 512.0 | 256.0 | 1024.0 | 2.0 | 32.0  | 2.0 | 131072.0 | 512.0  | 512.0  |
| 512.0 | 256.0 | 512.0  | 2.0 | 32.0  | 2.0 | 131072.0 | 512.0  | 512.0  |
| 512.0 | 256.0 | 512.0  | 8.0 | 32.0  | 2.0 | 131072.0 | 512.0  | 512.0  |
| 512.0 | 256.0 | 512.0  | 4.0 | 32.0  | 2.0 | 131072.0 | 512.0  | 512.0  |
| 512.0 | 256.0 | 1024.0 | 4.0 | 32.0  | 2.0 | 131072.0 | 512.0  | 512.0  |
| 512.0 | 512.0 | 512.0  | 4.0 | 32.0  | 2.0 | 131072.0 | 1024.0 | 512.0  |
| 512.0 | 256.0 | 512.0  | 4.0 | 16.0  | 2.0 | 131072.0 | 512.0  | 512.0  |
| 512.0 | 256.0 | 512.0  | 4.0 | 32.0  | 2.0 | 131072.0 | 512.0  | 512.0  |
| 512.0 | 256.0 | 512.0  | 4.0 | 64.0  | 4.0 | 32768.0  | 512.0  | 512.0  |
| 512.0 | 256.0 | 256.0  | 2.0 | 32.0  | 2.0 | 131072.0 | 512.0  | 512.0  |
| 512.0 | 512.0 | 512.0  | 2.0 | 16.0  | 4.0 | 65536.0  | 512.0  | 512.0  |
| 512.0 | 256.0 | 512.0  | 2.0 | 32.0  | 2.0 | 65536.0  | 512.0  | 512.0  |
| 512.0 | 256.0 | 512.0  | 2.0 | 16.0  | 8.0 | 65536.0  | 512.0  | 512.0  |
| 512.0 | 256.0 | 256.0  | 2.0 | 64.0  | 2.0 | 131072.0 | 512.0  | 512.0  |
| 512.0 | 256.0 | 1024.0 | 4.0 | 64.0  | 2.0 | 131072.0 | 512.0  | 512.0  |
| 512.0 | 256.0 | 512.0  | 2.0 | 64.0  | 2.0 | 131072.0 | 512.0  | 512.0  |
| 512.0 | 512.0 | 512.0  | 4.0 | 128.0 | 4.0 | 131072.0 | 512.0  | 512.0  |
| 512.0 | 512.0 | 512.0  | 4.0 | 128.0 | 2.0 | 131072.0 | 512.0  | 512.0  |
| 512.0 | 512.0 | 1024.0 | 8.0 | 64.0  | 2.0 | 131072.0 | 512.0  | 512.0  |
| 512.0 | 256.0 | 512.0  | 2.0 | 64.0  | 2.0 | 131072.0 | 512.0  | 512.0  |
| 512.0 | 256.0 | 512.0  | 2.0 | 32.0  | 2.0 | 131072.0 | 512.0  | 512.0  |
| 256.0 | 512.0 | 512.0  | 2.0 | 64.0  | 2.0 | 65536.0  | 512.0  | 1024.0 |
| 512.0 | 512.0 | 512.0  | 1.0 | 32.0  | 8.0 | 65536.0  | 512.0  | 512.0  |
| 512.0 | 256.0 | 512.0  | 4.0 | 16.0  | 2.0 | 131072.0 | 512.0  | 1024.0 |
| 512.0 | 256.0 | 512.0  | 2.0 | 32.0  | 2.0 | 131072.0 | 512.0  | 512.0  |
| 256.0 | 256.0 | 512.0  | 2.0 | 64.0  | 8.0 | 32768.0  | 512.0  | 512.0  |
| 512.0 | 256.0 | 512.0  | 1.0 | 64.0  | 2.0 | 131072.0 | 512.0  | 512.0  |
| 512.0 | 256.0 | 1024.0 | 4.0 | 64.0  | 4.0 | 131072.0 | 512.0  | 512.0  |
| 512.0 | 512.0 | 2048.0 | 1.0 | 64.0  | 2.0 | 262144.0 | 512.0  | 512.0  |
| 512.0 | 256.0 | 512.0  | 2.0 | 64.0  | 2.0 | 131072.0 | 512.0  | 512.0  |
| 512.0 | 256.0 | 512.0  | 2.0 | 64.0  | 2.0 | 65536.0  | 1024.0 | 512.0  |
| 512.0 | 256.0 | 1024.0 | 2.0 | 32.0  | 2.0 | 131072.0 | 512.0  | 512.0  |
| 512.0 | 256.0 | 512.0  | 2.0 | 32.0  | 2.0 | 65536.0  | 512.0  | 512.0  |
| 512.0 | 512.0 | 512.0  | 8.0 | 32.0  | 2.0 | 131072.0 | 512.0  | 512.0  |

propanol; NaOCl=sodium hypochlorite; PCMC=chlorocresol.
