# Supplementary material for: Biocide Susceptibility and Antimicrobial Resistance of Escherichia coli Isolated from Swine Feces, Pork Meat and Humans in Germany
Source: MDPI journal article supplement (doi:10.3390/antibiotics12050823), 2023-04-27
Supplement: s1 [file s1]

**Table S2a.** Pairwise comparisons of MIC distributions of *E. coli* of human and porcine origin.

| Biocide | Origin of isolates | <i>p</i> -value   |                   |                  |            |
|---------|--------------------|-------------------|-------------------|------------------|------------|
|         |                    | Swine feces       | Pork meat         | Voluntary donors | Inpatients |
| GDA     | Swine feces        |                   |                   |                  |            |
|         | Pork meat          | ns                |                   |                  |            |
|         | Voluntary donors   | ns                | ns                |                  |            |
|         | Inpatients         | <b>0.003</b>      | <b>0.029</b>      | ns               |            |
| CHG     | Swine feces        |                   |                   |                  |            |
|         | Pork meat          | <b>&lt;0.0001</b> |                   |                  |            |
|         | Voluntary donors   | ns                | <b>&lt;0.0001</b> |                  |            |
|         | Inpatients         | ns                | <b>&lt;0.0001</b> | ns               |            |
| BAC     | Swine feces        |                   |                   |                  |            |
|         | Pork meat          | ns                |                   |                  |            |
|         | Voluntary donors   | ns                | ns                |                  |            |
|         | Inpatients         | ns                | ns                | ns               |            |
| OCT     | Swine feces        |                   |                   |                  |            |
|         | Pork meat          | ns                |                   |                  |            |
|         | Voluntary donors   | ns                | ns                |                  |            |
|         | Inpatients         | ns                | ns                | ns               |            |
| IPA     | Swine feces        |                   |                   |                  |            |
|         | Pork meat          | ns                |                   |                  |            |
|         | Voluntary donors   | ns                | ns                |                  |            |
|         | Inpatients         | ns                | ns                | <b>0.039</b>     |            |
| NaOCl   | Swine feces        |                   |                   |                  |            |
|         | Pork meat          | ns                |                   |                  |            |
|         | Voluntary donors   | ns                | ns                |                  |            |
|         | Inpatients         | ns                | <b>0.037</b>      | ns               |            |
| PCMC    | Swine feces        |                   |                   |                  |            |
|         | Pork meat          | <b>0.001</b>      |                   |                  |            |
|         | Voluntary donors   | ns                | ns                |                  |            |
|         | Inpatients         | <b>0.007</b>      | ns                | ns               |            |

GDA=glutaraldehyde; CHG=chlorhexidine digluconate; BAC=benzalkonium chloride; OCT=octenidine dihydrochloride; IPA=isopropanol; NaOCl=sodium hypochlorite; PCMC=polyhexamethylene biguanide. Differences are considered significant at  $p < 0.05$ . Significance values have been adjusted by the Bonferroni correction for multiple tests.

anol; NaOCl=sodium hypochlorite; PCMC=chlorocresol; ns=not significant.

**Table S2b.** Pairwise comparisons of MBC distributions of *E. coli* of human and porcine origin

| Biocide | Origin of isolates | <i>p</i> -value   |                   |                  |            |
|---------|--------------------|-------------------|-------------------|------------------|------------|
|         |                    | Swine feces       | Pork meat         | Voluntary donors | Inpatients |
| GDA     | Swine feces        |                   |                   |                  |            |
|         | Pork meat          | ns                |                   |                  |            |
|         | Voluntary donors   | ns                | ns                |                  |            |
|         | Inpatients         | <b>0.007</b>      | <b>0.021</b>      | ns               |            |
| CHG     | Swine feces        |                   |                   |                  |            |
|         | Pork meat          | <b>&lt;0.0001</b> |                   |                  |            |
|         | Voluntary donors   | ns                | <b>&lt;0.0001</b> |                  |            |
|         | Inpatients         | ns                | <b>&lt;0.0001</b> | ns               |            |
| BAC     | Swine feces        |                   |                   |                  |            |
|         | Pork meat          | ns                |                   |                  |            |
|         | Voluntary donors   | ns                | ns                |                  |            |
|         | Inpatients         | ns                | ns                | ns               |            |
| OCT     | Swine feces        |                   |                   |                  |            |
|         | Pork meat          | ns                |                   |                  |            |
|         | Voluntary donors   | ns                | ns                |                  |            |
|         | Inpatients         | ns                | ns                | ns               |            |
| IPA     | Swine feces        |                   |                   |                  |            |
|         | Pork meat          | <b>0.034</b>      |                   |                  |            |
|         | Voluntary donors   | ns                | ns                |                  |            |
|         | Inpatients         | ns                | <b>0.019</b>      | ns               |            |
| NaOCl   | Swine feces        |                   |                   |                  |            |
|         | Pork meat          | ns                |                   |                  |            |
|         | Voluntary donors   | ns                | ns                |                  |            |
|         | Inpatients         | ns                | ns                | ns               |            |
| PCMC    | Swine feces        |                   |                   |                  |            |
|         | Pork meat          | ns                |                   |                  |            |
|         | Voluntary donors   | ns                | ns                |                  |            |
|         | Inpatients         | ns                | ns                | ns               |            |

GDA=glutaraldehyde; CHG=chlorhexidine digluconate; BAC=benzalkonium chloride; OCT=octenidine dihydrochloride; IPA=isopropanol; Differences are considered significant at  $p < 0.05$ . Significance values have been adjusted by the Bonferroni correction for multiple tests.

; NaOCl=sodium hypochlorite; PCMC=chlorocresol; ns=not significant.
