# Supplementary material for: Biocide Susceptibility and Antimicrobial Resistance of Escherichia coli Isolated from Swine Feces, Pork Meat and Humans in Germany
Source: MDPI journal article supplement (doi:10.3390/antibiotics12050823), 2023-04-27
Supplement: s1 [file s1]

**Table S4.** Antimicrobial susceptibility of 393 *E. coli*

| BfR-ID    | Origin of isolates | Resistance | AMP | AZI | CHL | CIP     | COL | CTA    |
|-----------|--------------------|------------|-----|-----|-----|---------|-----|--------|
| 18-47-134 | Voluntary donor    | ESBL       | >32 | 16  | 16  | 0.12    | <=1 | >4     |
| 18-47-135 | Voluntary donor    | ESBL       | >32 | 8   | 64  | >8      | <=1 | >4     |
| 18-47-136 | Voluntary donor    | ESBL       | >32 | 4   | 16  | 8       | <=1 | >4     |
| 18-47-137 | Voluntary donor    | ESBL       | >32 | 8   | <=8 | >8      | <=1 | >4     |
| 18-47-138 | Voluntary donor    | ESBL       | >32 | 4   | <=8 | 0.03    | <=1 | >4     |
| 18-47-139 | Voluntary donor    | ESBL       | >32 | 4   | <=8 | 8       | <=1 | >4     |
| 18-47-140 | Voluntary donor    | ESBL       | >32 | 4   | <=8 | <=0.015 | <=1 | >4     |
| 18-47-141 | Voluntary donor    | ESBL       | >32 | 8   | <=8 | <=0.015 | <=1 | >4     |
| 18-47-142 | Voluntary donor    | ESBL       | >32 | 64  | >64 | 8       | <=1 | >4     |
| 18-47-143 | Voluntary donor    | ESBL       | >32 | 4   | <=8 | <=0.015 | <=1 | >4     |
| 18-47-144 | Voluntary donor    | ESBL       | >32 | 8   | <=8 | <=0.015 | <=1 | >4     |
| 18-47-150 | Voluntary donor    | ESBL       | >32 | 64  | >64 | 8       | <=1 | >4     |
| 18-47-151 | Voluntary donor    | ESBL       | >32 | 8   | <=8 | 0.03    | <=1 | >4     |
| 18-47-152 | Voluntary donor    | ESBL       | >32 | 4   | <=8 | <=0.015 | <=1 | >4     |
| 18-47-154 | Voluntary donor    | ESBL       | >32 | 8   | 16  | >8      | <=1 | >4     |
| 18-47-155 | Voluntary donor    | ESBL       | >32 | 8   | 16  | >8      | <=1 | >4     |
| 18-47-157 | Voluntary donor    | non-ESBL   | 4   | 8   | <=8 | <=0.015 | <=1 | <=0.25 |
| 18-47-158 | Voluntary donor    | non-ESBL   | 4   | 8   | <=8 | <=0.015 | <=1 | <=0.25 |
| 18-47-159 | Voluntary donor    | non-ESBL   | >32 | 32  | <=8 | 0.25    | <=1 | <=0.25 |
| 18-47-160 | Voluntary donor    | non-ESBL   | 2   | 8   | <=8 | <=0.015 | <=1 | <=0.25 |
| 18-47-161 | Voluntary donor    | non-ESBL   | 2   | 4   | <=8 | <=0.015 | <=1 | <=0.25 |
| 18-47-162 | Voluntary donor    | non-ESBL   | 4   | 4   | <=8 | <=0.015 | <=1 | <=0.25 |
| 18-47-164 | Voluntary donor    | non-ESBL   | 4   | 8   | <=8 | <=0.015 | <=1 | <=0.25 |
| 18-47-167 | Voluntary donor    | non-ESBL   | 4   | 8   | <=8 | <=0.015 | <=1 | <=0.25 |
| 18-47-168 | Voluntary donor    | non-ESBL   | 4   | 8   | <=8 | 0.03    | 2   | <=0.25 |
| 18-47-169 | Voluntary donor    | non-ESBL   | 2   | 4   | <=8 | <=0.015 | <=1 | <=0.25 |
| 18-47-170 | Voluntary donor    | non-ESBL   | 4   | 8   | <=8 | <=0.015 | <=1 | <=0.25 |
| 18-47-171 | Voluntary donor    | non-ESBL   | >32 | 8   | <=8 | <=0.015 | <=1 | <=0.25 |
| 18-47-172 | Voluntary donor    | non-ESBL   | 2   | 8   | <=8 | <=0.015 | <=1 | <=0.25 |
| 18-47-174 | Voluntary donor    | ESBL       | >32 | 4   | <=8 | >8      | <=1 | >4     |
| 18-47-176 | Voluntary donor    | ESBL       | >32 | 8   | <=8 | <=0.015 | <=1 | >4     |
| 18-47-177 | Voluntary donor    | ESBL       | >32 | 8   | <=8 | <=0.015 | <=1 | >4     |
| 18-47-178 | Voluntary donor    | ESBL       | >32 | 8   | <=8 | >8      | <=1 | >4     |
| 18-47-179 | Voluntary donor    | ESBL       | >32 | 64  | <=8 | <=0.015 | <=1 | >4     |
| 18-47-180 | Voluntary donor    | ESBL       | >32 | >64 | >64 | >8      | <=1 | >4     |
| 18-47-183 | Voluntary donor    | non-ESBL   | 4   | 8   | <=8 | 0.03    | <=1 | <=0.25 |
| 18-47-184 | Voluntary donor    | non-ESBL   | 4   | 4   | <=8 | <=0.015 | <=1 | <=0.25 |
| 18-47-187 | Voluntary donor    | non-ESBL   | >32 | 4   | >64 | 0.25    | <=1 | <=0.25 |
| 18-47-188 | Voluntary donor    | non-ESBL   | >32 | 4   | >64 | 0.25    | <=1 | <=0.25 |
| 18-47-189 | Voluntary donor    | non-ESBL   | 4   | 4   | <=8 | <=0.015 | <=1 | <=0.25 |
| 18-47-190 | Voluntary donor    | non-ESBL   | >32 | 4   | <=8 | <=0.015 | <=1 | <=0.25 |
| 18-47-191 | Voluntary donor    | non-ESBL   | 2   | 4   | <=8 | <=0.015 | <=1 | <=0.25 |
| 18-47-192 | Voluntary donor    | non-ESBL   | 2   | 4   | <=8 | <=0.015 | <=1 | <=0.25 |
| 18-47-193 | Voluntary donor    | non-ESBL   | >32 | 4   | >64 | <=0.015 | <=1 | <=0.25 |
| 18-47-194 | Voluntary donor    | non-ESBL   | >32 | 32  | <=8 | 0.12    | <=1 | <=0.25 |
| 18-47-195 | Voluntary donor    | non-ESBL   | 4   | 8   | <=8 | <=0.015 | <=1 | <=0.25 |
| 18-47-196 | Voluntary donor    | non-ESBL   | >32 | 4   | <=8 | 0.25    | 4   | <=0.25 |
| 18-47-197 | Voluntary donor    | non-ESBL   | 4   | 4   | <=8 | <=0.015 | 2   | <=0.25 |

|           |                 |          |     |     |     |         |     |        |
|-----------|-----------------|----------|-----|-----|-----|---------|-----|--------|
| 18-47-199 | Voluntary donor | non-ESBL | 4   | 16  | <=8 | <=0.015 | 2   | <=0.25 |
| 18-47-202 | Voluntary donor | non-ESBL | 2   | 4   | <=8 | <=0.015 | <=1 | <=0.25 |
| 18-47-203 | Voluntary donor | ESBL     | >32 | 64  | 16  | >8      | <=1 | >4     |
| 18-47-204 | Voluntary donor | ESBL     | >32 | 8   | <=8 | 8       | <=1 | >4     |
| 18-47-208 | Voluntary donor | ESBL     | >32 | 64  | <=8 | >8      | <=1 | >4     |
| 18-47-209 | Voluntary donor | ESBL     | >32 | 4   | <=8 | 4       | <=1 | >4     |
| 18-47-210 | Voluntary donor | ESBL     | >32 | 8   | <=8 | >8      | <=1 | >4     |
| 18-47-211 | Voluntary donor | ESBL     | >32 | 16  | <=8 | 0.03    | <=1 | >4     |
| 18-47-213 | Voluntary donor | ESBL     | >32 | 8   | <=8 | <=0.015 | <=1 | >4     |
| 18-47-224 | Voluntary donor | ESBL     | >32 | 8   | <=8 | <=0.015 | <=1 | >4     |
| 18-47-225 | Voluntary donor | non-ESBL | 2   | 8   | <=8 | 0.25    | <=1 | <=0.25 |
| 18-47-226 | Voluntary donor | ESBL     | >32 | >64 | <=8 | >8      | <=1 | >4     |
| 18-47-227 | Voluntary donor | ESBL     | >32 | >64 | 16  | >8      | <=1 | >4     |
| 18-47-228 | Voluntary donor | ESBL     | >32 | 8   | <=8 | 0.25    | <=1 | >4     |
| 18-47-230 | Voluntary donor | ESBL     | >32 | >64 | <=8 | >8      | <=1 | >4     |
| 18-47-231 | Voluntary donor | ESBL     | >32 | >64 | <=8 | >8      | <=1 | >4     |
| 18-47-233 | Voluntary donor | ESBL     | >32 | 8   | <=8 | 0.25    | <=1 | >4     |
| 18-47-235 | Voluntary donor | ESBL     | >32 | 8   | <=8 | <=0.015 | <=1 | >4     |
| 18-47-239 | Voluntary donor | ESBL     | >32 | >64 | <=8 | 0.25    | <=1 | >4     |
| 18-47-241 | Voluntary donor | ESBL     | >32 | >64 | 64  | <=0.015 | <=1 | >4     |
| 18-47-242 | Voluntary donor | ESBL     | >32 | 64  | <=8 | >8      | <=1 | >4     |
| 18-47-244 | Voluntary donor | ESBL     | >32 | 8   | >64 | 8       | <=1 | >4     |
| 18-47-246 | Voluntary donor | ESBL     | >32 | 64  | <=8 | 0.03    | <=1 | >4     |
| 18-47-247 | Voluntary donor | ESBL     | >32 | 8   | <=8 | <=0.015 | <=1 | >4     |
| 18-47-248 | Voluntary donor | ESBL     | >32 | 8   | >64 | >8      | <=1 | >4     |
| 18-47-249 | Voluntary donor | ESBL     | >32 | 8   | >64 | 8       | <=1 | >4     |
| 18-47-251 | Voluntary donor | ESBL     | >32 | 4   | <=8 | 0.25    | <=1 | >4     |
| 18-47-252 | Voluntary donor | ESBL     | >32 | 8   | <=8 | <=0.015 | <=1 | >4     |
| 18-47-253 | Voluntary donor | ESBL     | >32 | 4   | <=8 | 0.25    | <=1 | >4     |
| 18-47-342 | Voluntary donor | non-ESBL | 2   | 4   | <=8 | <=0.015 | <=1 | <=0.25 |
| 18-47-344 | Voluntary donor | non-ESBL | 8   | 8   | 16  | 0.03    | <=1 | <=0.25 |
| 18-47-345 | Voluntary donor | non-ESBL | 4   | 8   | <=8 | 0.03    | <=1 | <=0.25 |
| 18-47-347 | Voluntary donor | non-ESBL | >32 | 8   | <=8 | <=0.015 | <=1 | <=0.25 |
| 18-47-348 | Voluntary donor | non-ESBL | 2   | 4   | <=8 | 0.25    | <=1 | <=0.25 |
| 18-47-349 | Voluntary donor | non-ESBL | >32 | 64  | <=8 | <=0.015 | <=1 | <=0.25 |
| 18-47-350 | Voluntary donor | non-ESBL | 4   | 4   | <=8 | <=0.015 | <=1 | <=0.25 |
| 18-47-351 | Voluntary donor | non-ESBL | 2   | 4   | <=8 | <=0.015 | <=1 | <=0.25 |
| 18-47-352 | Voluntary donor | non-ESBL | 2   | 8   | <=8 | <=0.015 | <=1 | <=0.25 |
| 18-47-353 | Voluntary donor | non-ESBL | 4   | 8   | <=8 | 0.03    | <=1 | <=0.25 |
| 18-47-358 | Voluntary donor | non-ESBL | >32 | 4   | <=8 | <=0.015 | <=1 | <=0.25 |
| 18-47-359 | Voluntary donor | non-ESBL | >32 | 4   | <=8 | <=0.015 | <=1 | <=0.25 |
| 18-47-360 | Voluntary donor | non-ESBL | 4   | 8   | <=8 | 0.03    | <=1 | <=0.25 |
| 18-47-362 | Voluntary donor | non-ESBL | 4   | 8   | <=8 | 0.03    | 4   | <=0.25 |
| 18-47-363 | Voluntary donor | non-ESBL | 4   | 8   | <=8 | 0.03    | <=1 | <=0.25 |
| 18-47-364 | Voluntary donor | non-ESBL | 4   | 8   | <=8 | <=0.015 | <=1 | <=0.25 |
| 18-47-369 | Voluntary donor | ESBL     | >32 | >64 | <=8 | >8      | <=1 | >4     |
| 18-47-377 | Voluntary donor | ESBL     | >32 | 64  | <=8 | >8      | <=1 | >4     |
| 18-47-378 | Voluntary donor | ESBL     | >32 | 8   | <=8 | 8       | <=1 | >4     |
| 18-47-229 | Inpatient       | ESBL     | >32 | 16  | 16  | >8      | <=1 | >4     |
| 18-47-232 | Inpatient       | ESBL     | >32 | 4   | <=8 | <=0.015 | <=1 | >4     |
| 20-47-2   | Swine feces     | ESBL     | >32 | >64 | >64 | <=0.015 | 8   | -      |

|           |             |          |     |     |      |         |     |        |
|-----------|-------------|----------|-----|-----|------|---------|-----|--------|
| 20-47-4   | Swine feces | ESBL     | >32 | >64 | >64  | 0.03    | 2   | -      |
| 20-47-5   | Swine feces | non-ESBL | 2   | 8   | <=8  | <=0.015 | <=1 | <=0.25 |
| 20-47-6   | Swine feces | non-ESBL | 8   | 8   | 16   | 0.03    | <=1 | <=0.25 |
| 20-47-7   | Swine feces | ESBL     | >32 | 64  | <=8  | >8      | <=1 | >4     |
| 20-47-8   | Swine feces | ESBL     | >32 | >64 | <=8  | >8      | <=1 | >4     |
| 20-47-9   | Swine feces | ESBL     | >32 | 8   | 16   | 1       | <=1 | >4     |
| 20-47-10  | Swine feces | ESBL     | >32 | 8   | 16   | 0.03    | <=1 | >4     |
| 20-47-11  | Swine feces | ESBL     | >32 | 8   | 16   | 0.03    | <=1 | >4     |
| 20-47-12  | Swine feces | ESBL     | >32 | 8   | <=8  | <=0.015 | <=1 | >4     |
| 20-47-13  | Swine feces | ESBL     | >32 | 8   | 16   | <=0.015 | <=1 | >4     |
| 20-47-16  | Swine feces | ESBL     | >32 | 8   | 16   | 1       | <=1 | >4     |
| 20-47-18  | Swine feces | ESBL     | >32 | 8   | <=8  | <=0.015 | <=1 | >4     |
| 20-47-19  | Swine feces | ESBL     | >32 | 8   | <=8  | <=0.015 | <=1 | >4     |
| 20-47-20  | Swine feces | ESBL     | >32 | 8   | <=8  | <=0.015 | <=1 | >4     |
| 20-47-21  | Swine feces | ESBL     | >32 | 8   | <=8  | <=0.015 | <=1 | >4     |
| 20-47-23  | Swine feces | ESBL     | >32 | 8   | <=8  | 0.5     | <=1 | >4     |
| 20-47-24  | Swine feces | ESBL     | >32 | 8   | <=8  | <=0.015 | <=1 | >4     |
| 20-47-25  | Swine feces | ESBL     | >32 | 16  | 16   | 1       | <=1 | >4     |
| 20-47-27  | Swine feces | ESBL     | >32 | 16  | 16   | >8      | <=1 | >4     |
| 20-47-28  | Swine feces | ESBL     | >32 | 8   | <=8  | >8      | <=1 | >4     |
| 20-47-29  | Swine feces | ESBL     | >32 | 8   | >64  | 8       | 8   | >4     |
| 20-47-30  | Swine feces | ESBL     | >32 | 8   | >64  | 8       | 4   | >4     |
| 20-47-31  | Swine feces | ESBL     | >32 | 8   | >64  | >8      | 4   | >4     |
| 20-47-32  | Swine feces | ESBL     | >32 | 32  | >64  | >8      | 8   | >4     |
| 20-47-33  | Swine feces | ESBL     | >32 | 8   | <=8  | <=0.015 | <=1 | >4     |
| 20-47-34  | Swine feces | ESBL     | >32 | 8   | <=8  | <=0.015 | 2   | >4     |
| 20-47-35  | Swine feces | ESBL     | >32 | >64 | >64  | 0.03    | 8   | >4     |
| 20-47-36  | Swine feces | ESBL     | >32 | >64 | 16   | 0.03    | 8   | >4     |
| 20-47-37  | Swine feces | ESBL     | >32 | >64 | 64   | <=0.015 | <=1 | >4     |
| 20-47-38  | Swine feces | ESBL     | >32 | >64 | 64   | <=0.015 | <=1 | >4     |
| 20-47-40  | Swine feces | ESBL     | >32 | >64 | 64   | 0.03    | <=1 | >4     |
| 20-47-41  | Swine feces | ESBL     | >32 | 4   | <=8  | <=0.015 | <=1 | >4     |
| 20-47-42  | Swine feces | ESBL     | >32 | 4   | <=8  | <=0.015 | <=1 | >4     |
| 20-47-43  | Swine feces | ESBL     | >32 | 4   | <=8  | <=0.015 | <=1 | >4     |
| 20-47-44  | Swine feces | ESBL     | >32 | 8   | 16   | <=0.015 | <=1 | >4     |
| 20-47-45  | Swine feces | ESBL     | >32 | 4   | <=8  | <=0.015 | <=1 | >4     |
| 20-47-46  | Swine feces | ESBL     | >32 | 4   | <=8  | <=0.015 | <=1 | >4     |
| 20-47-47  | Swine feces | ESBL     | >32 | 4   | 64   | <=0.015 | <=1 | >4     |
| 20-47-48  | Swine feces | ESBL     | >32 | 4   | 64   | <=0.015 | <=1 | >4     |
| 20-47-49  | Swine feces | ESBL     | >32 | 4   | <=8  | <=0.015 | <=1 | >4     |
| 20-47-50  | Swine feces | ESBL     | >32 | 4   | 64   | <=0.015 | <=1 | >4     |
| 20-47-51  | Swine feces | ESBL     | >32 | 8   | <=8  | 0.03    | <=1 | >4     |
| 20-47-52  | Swine feces | ESBL     | >32 | 8   | <=8  | 0.03    | <=1 | >4     |
| 20-47-53  | Swine feces | ESBL     | >32 | 4   | <=8  | <=0.015 | 2   | >4     |
| 20-47-55  | Swine feces | ESBL     | >32 | 8   | <=8  | <=0.015 | <=1 | >4     |
| 20-47-56  | Swine feces | ESBL     | >32 | 8   | <=8  | <=0.015 | <=1 | >4     |
| 20-47-65  | Swine feces | non-ESBL | >32 | <=2 | 64   | <=0.015 | <=1 | <=0.25 |
| 20-47-183 | Swine feces | non-ESBL | 2   | 8   | <=8  | 0.25    | <=1 | <=0.25 |
| 20-47-184 | Swine feces | non-ESBL | >64 | >64 | <=8  | 0.5     | <=1 | <=0.25 |
| 20-47-185 | Swine feces | non-ESBL | >64 | 16  | >128 | <=0.015 | <=1 | <=0.25 |
| 20-47-186 | Swine feces | non-ESBL | 2   | 16  | <=8  | 0.25    | <=1 | <=0.25 |

|           |             |          |     |     |     |         |     |        |
|-----------|-------------|----------|-----|-----|-----|---------|-----|--------|
| 20-47-187 | Swine feces | non-ESBL | 4   | 16  | <=8 | <=0.015 | <=1 | <=0.25 |
| 20-47-188 | Swine feces | non-ESBL | 4   | 8   | <=8 | <=0.015 | <=1 | <=0.25 |
| 20-47-189 | Swine feces | non-ESBL | <=1 | 8   | <=8 | <=0.015 | <=1 | <=0.25 |
| 20-47-190 | Swine feces | non-ESBL | 2   | 4   | <=8 | <=0.015 | <=1 | <=0.25 |
| 20-47-191 | Swine feces | non-ESBL | 4   | 8   | <=8 | <=0.015 | <=1 | <=0.25 |
| 20-47-192 | Swine feces | non-ESBL | >64 | 8   | <=8 | 0.03    | <=1 | <=0.25 |
| 20-47-193 | Swine feces | non-ESBL | >64 | 16  | <=8 | <=0.015 | <=1 | <=0.25 |
| 20-47-194 | Swine feces | non-ESBL | >64 | 8   | <=8 | <=0.015 | <=1 | <=0.25 |
| 20-47-195 | Swine feces | non-ESBL | 2   | 8   | <=8 | <=0.015 | <=1 | <=0.25 |
| 20-47-197 | Swine feces | non-ESBL | 2   | 8   | <=8 | <=0.015 | <=1 | <=0.25 |
| 20-47-198 | Swine feces | non-ESBL | 2   | 8   | <=8 | <=0.015 | <=1 | <=0.25 |
| 20-47-199 | Swine feces | non-ESBL | >64 | 16  | 64  | 0.5     | <=1 | <=0.25 |
| 20-47-200 | Swine feces | non-ESBL | >64 | 16  | <=8 | 0.03    | <=1 | <=0.25 |
| 20-47-202 | Swine feces | non-ESBL | 4   | 16  | <=8 | 0.03    | <=1 | <=0.25 |
| 20-47-203 | Swine feces | non-ESBL | 2   | 8   | <=8 | <=0.015 | <=1 | <=0.25 |
| 20-47-204 | Swine feces | non-ESBL | 4   | 8   | <=8 | <=0.015 | <=1 | <=0.25 |
| 20-47-205 | Swine feces | non-ESBL | 8   | 8   | 16  | 0.03    | <=1 | <=0.25 |
| 20-47-206 | Swine feces | non-ESBL | 2   | 8   | <=8 | 0.03    | <=1 | <=0.25 |
| 20-47-207 | Swine feces | non-ESBL | 4   | 4   | <=8 | 0.03    | <=1 | <=0.25 |
| 20-47-208 | Swine feces | non-ESBL | <=1 | 8   | <=8 | <=0.015 | <=1 | <=0.25 |
| 20-47-209 | Swine feces | non-ESBL | >64 | 4   | <=8 | <=0.015 | <=1 | <=0.25 |
| 20-47-210 | Swine feces | non-ESBL | 2   | 8   | <=8 | <=0.015 | <=1 | <=0.25 |
| 20-47-211 | Swine feces | non-ESBL | >64 | 16  | <=8 | <=0.015 | <=1 | <=0.25 |
| 20-47-212 | Swine feces | non-ESBL | 8   | 8   | <=8 | 0.03    | <=1 | <=0.25 |
| 20-47-213 | Swine feces | non-ESBL | >64 | 8   | 128 | 0.03    | 4   | <=0.25 |
| 20-47-214 | Swine feces | non-ESBL | 2   | <=2 | <=8 | 0.5     | <=1 | <=0.25 |
| 20-47-215 | Swine feces | non-ESBL | 4   | 8   | 16  | 0.03    | <=1 | <=0.25 |
| 20-47-216 | Swine feces | non-ESBL | >64 | 4   | <=8 | <=0.015 | <=1 | <=0.25 |
| 20-47-217 | Swine feces | non-ESBL | 4   | 8   | <=8 | <=0.015 | <=1 | <=0.25 |
| 20-47-219 | Swine feces | non-ESBL | >64 | 8   | <=8 | <=0.015 | <=1 | <=0.25 |
| 20-47-220 | Swine feces | non-ESBL | 4   | 8   | <=8 | <=0.015 | <=1 | <=0.25 |
| 20-47-222 | Swine feces | non-ESBL | 4   | 16  | 16  | 0.03    | <=1 | <=0.25 |
| 20-47-223 | Swine feces | non-ESBL | 2   | 4   | <=8 | >8      | <=1 | <=0.25 |
| 20-47-224 | Swine feces | non-ESBL | 2   | 4   | <=8 | <=0.015 | <=1 | <=0.25 |
| 20-47-225 | Swine feces | non-ESBL | 4   | 8   | <=8 | <=0.015 | <=1 | <=0.25 |
| 20-47-226 | Swine feces | non-ESBL | 4   | 8   | <=8 | >8      | <=1 | <=0.25 |
| 20-47-227 | Swine feces | non-ESBL | >64 | 16  | <=8 | <=0.015 | <=1 | <=0.25 |
| 20-47-228 | Swine feces | non-ESBL | 4   | 8   | <=8 | 0.03    | <=1 | <=0.25 |
| 20-47-229 | Swine feces | non-ESBL | 2   | 8   | <=8 | 0.03    | <=1 | <=0.25 |
| 20-47-230 | Swine feces | non-ESBL | >64 | 8   | <=8 | <=0.015 | <=1 | <=0.25 |
| 20-47-231 | Swine feces | non-ESBL | 2   | <=2 | <=8 | <=0.015 | <=1 | <=0.25 |
| 20-47-232 | Swine feces | non-ESBL | 2   | 4   | <=8 | <=0.015 | <=1 | <=0.25 |
| 20-47-233 | Swine feces | non-ESBL | 2   | 8   | <=8 | <=0.015 | <=1 | <=0.25 |
| 20-47-66  | Swine feces | non-ESBL | >32 | 4   | 64  | <=0.015 | <=1 | <=0.25 |
| 20-47-58  | Swine feces | ESBL     | >32 | 8   | <=8 | <=0.015 | <=1 | >4     |
| 20-47-59  | Swine feces | ESBL     | >32 | 8   | <=8 | <=0.015 | <=1 | >4     |
| 20-47-60  | Swine feces | ESBL     | >32 | 4   | <=8 | <=0.015 | <=1 | >4     |
| 20-47-67  | Swine feces | non-ESBL | >32 | 8   | <=8 | <=0.015 | <=1 | <=0.25 |
| 20-47-83  | Pork meat   | non-ESBL | 2   | 8   | <=8 | <=0.015 | <=1 | <=0.25 |
| 20-47-84  | Pork meat   | non-ESBL | 2   | 16  | <=8 | <=0.015 | <=1 | <=0.25 |
| 20-47-85  | Pork meat   | non-ESBL | 2   | 8   | <=8 | <=0.015 | <=1 | <=0.25 |

|           |           |          |     |     |      |         |     |        |
|-----------|-----------|----------|-----|-----|------|---------|-----|--------|
| 20-47-86  | Pork meat | ESBL     | >64 | 64  | >128 | <=0.015 | <=1 | >4     |
| 20-47-87  | Pork meat | ESBL     | >64 | 16  | 16   | 8       | <=1 | >4     |
| 20-47-88  | Pork meat | ESBL     | >64 | 4   | <=8  | 0.06    | <=1 | >4     |
| 20-47-89  | Pork meat | non-ESBL | >64 | 16  | <=8  | <=0.015 | <=1 | <=0.25 |
| 20-47-90  | Pork meat | non-ESBL | >64 | 16  | 32   | 0.03    | <=1 | <=0.25 |
| 20-47-91  | Pork meat | ESBL     | >64 | 4   | <=8  | <=0.015 | <=1 | 1      |
| 20-47-92  | Pork meat | ESBL     | >64 | 32  | <=8  | 0.5     | 2   | >4     |
| 20-47-93  | Pork meat | non-ESBL | >64 | 8   | <=8  | 0.25    | <=1 | <=0.25 |
| 20-47-94  | Pork meat | ESBL     | >64 | 16  | >128 | 1       | <=1 | >4     |
| 20-47-95  | Pork meat | ESBL     | >64 | 4   | <=8  | 0.03    | <=1 | >4     |
| 20-47-96  | Pork meat | non-ESBL | >64 | 16  | 64   | 0.03    | <=1 | <=0.25 |
| 20-47-97  | Pork meat | non-ESBL | >64 | 16  | <=8  | <=0.015 | <=1 | <=0.25 |
| 20-47-98  | Pork meat | non-ESBL | 2   | 8   | <=8  | <=0.015 | <=1 | <=0.25 |
| 20-47-99  | Pork meat | non-ESBL | 4   | 8   | <=8  | 0.03    | <=1 | <=0.25 |
| 20-47-100 | Pork meat | non-ESBL | >64 | 16  | <=8  | 0.03    | <=1 | <=0.25 |
| 20-47-101 | Pork meat | non-ESBL | 4   | 16  | <=8  | 0.03    | <=1 | <=0.25 |
| 20-47-102 | Pork meat | ESBL     | >64 | 4   | <=8  | <=0.015 | <=1 | >4     |
| 20-47-103 | Pork meat | ESBL     | >64 | 4   | <=8  | <=0.015 | <=1 | >4     |
| 20-47-104 | Pork meat | ESBL     | >64 | 8   | <=8  | <=0.015 | <=1 | >4     |
| 20-47-105 | Pork meat | non-ESBL | 2   | 4   | <=8  | <=0.015 | <=1 | <=0.25 |
| 20-47-106 | Pork meat | non-ESBL | 4   | 4   | <=8  | <=0.015 | <=1 | <=0.25 |
| 20-47-107 | Pork meat | ESBL     | >64 | 32  | >128 | 0.25    | <=1 | >4     |
| 20-47-108 | Pork meat | ESBL     | >64 | 16  | <=8  | <=0.015 | <=1 | >4     |
| 20-47-109 | Pork meat | non-ESBL | 4   | 8   | <=8  | <=0.015 | <=1 | <=0.25 |
| 20-47-110 | Pork meat | ESBL     | >64 | 32  | <=8  | <=0.015 | <=1 | >4     |
| 20-47-111 | Pork meat | ESBL     | >64 | >64 | 16   | <=0.015 | <=1 | 1      |
| 20-47-112 | Pork meat | ESBL     | >64 | 8   | >128 | <=0.015 | <=1 | >4     |
| 20-47-113 | Pork meat | ESBL     | >64 | 16  | <=8  | 0.5     | <=1 | >4     |
| 20-47-114 | Pork meat | ESBL     | >64 | 64  | 128  | >8      | <=1 | >4     |
| 20-47-115 | Pork meat | non-ESBL | 4   | 16  | <=8  | 0.06    | <=1 | <=0.25 |
| 20-47-116 | Pork meat | non-ESBL | 2   | 16  | 16   | <=0.015 | <=1 | <=0.25 |
| 20-47-117 | Pork meat | non-ESBL | >64 | 8   | 64   | 0.03    | <=1 | <=0.25 |
| 20-47-119 | Pork meat | non-ESBL | 4   | 4   | <=8  | <=0.015 | <=1 | <=0.25 |
| 20-47-120 | Pork meat | ESBL     | >64 | <=2 | <=8  | <=0.015 | <=1 | >4     |
| 20-47-122 | Pork meat | ESBL     | >64 | 4   | <=8  | >8      | <=1 | >4     |
| 20-47-123 | Pork meat | non-ESBL | 4   | 8   | 16   | <=0.015 | <=1 | <=0.25 |
| 20-47-124 | Pork meat | ESBL     | >64 | 4   | <=8  | <=0.015 | <=1 | >4     |
| 20-47-125 | Pork meat | non-ESBL | 8   | 4   | 16   | <=0.015 | <=1 | <=0.25 |
| 20-47-126 | Pork meat | non-ESBL | 8   | 4   | <=8  | <=0.015 | <=1 | <=0.25 |
| 20-47-127 | Pork meat | non-ESBL | 2   | 8   | <=8  | <=0.015 | <=1 | <=0.25 |
| 20-47-128 | Pork meat | non-ESBL | >64 | 8   | <=8  | 0.25    | <=1 | <=0.25 |
| 20-47-129 | Pork meat | non-ESBL | 4   | 8   | <=8  | <=0.015 | <=1 | <=0.25 |
| 20-47-130 | Pork meat | ESBL     | >64 | 4   | <=8  | <=0.015 | <=1 | >4     |
| 20-47-131 | Pork meat | non-ESBL | 4   | 8   | <=8  | <=0.015 | <=1 | <=0.25 |
| 20-47-132 | Pork meat | non-ESBL | >64 | 8   | <=8  | <=0.015 | <=1 | <=0.25 |
| 20-47-133 | Pork meat | non-ESBL | >64 | 8   | >128 | <=0.015 | <=1 | <=0.25 |
| 20-47-134 | Pork meat | non-ESBL | 4   | 8   | <=8  | 0.03    | <=1 | <=0.25 |
| 20-47-135 | Pork meat | non-ESBL | >64 | 8   | 32   | <=0.015 | <=1 | <=0.25 |
| 20-47-136 | Pork meat | ESBL     | >64 | 8   | <=8  | <=0.015 | <=1 | >4     |
| 20-47-137 | Pork meat | non-ESBL | 4   | 8   | <=8  | <=0.015 | <=1 | <=0.25 |
| 20-47-138 | Pork meat | non-ESBL | 4   | 8   | <=8  | 0.03    | <=1 | <=0.25 |

|           |           |          |     |     |      |         |     |        |
|-----------|-----------|----------|-----|-----|------|---------|-----|--------|
| 20-47-139 | Pork meat | ESBL     | >64 | 8   | <=8  | 0.25    | <=1 | >4     |
| 20-47-140 | Pork meat | ESBL     | >64 | 8   | <=8  | <=0.015 | <=1 | 1      |
| 20-47-141 | Pork meat | non-ESBL | 4   | 8   | <=8  | <=0.015 | <=1 | <=0.25 |
| 20-47-142 | Pork meat | non-ESBL | 4   | 4   | <=8  | <=0.015 | <=1 | <=0.25 |
| 20-47-143 | Pork meat | non-ESBL | 4   | 8   | <=8  | <=0.015 | <=1 | <=0.25 |
| 20-47-144 | Pork meat | non-ESBL | 4   | 4   | <=8  | <=0.015 | <=1 | <=0.25 |
| 20-47-145 | Pork meat | non-ESBL | >64 | 8   | >128 | <=0.015 | <=1 | <=0.25 |
| 20-47-146 | Pork meat | non-ESBL | 4   | 4   | <=8  | <=0.015 | <=1 | <=0.25 |
| 20-47-147 | Pork meat | non-ESBL | 4   | 4   | <=8  | <=0.015 | <=1 | <=0.25 |
| 20-47-148 | Pork meat | non-ESBL | 4   | 8   | <=8  | <=0.015 | <=1 | <=0.25 |
| 20-47-149 | Pork meat | non-ESBL | >64 | 4   | <=8  | <=0.015 | <=1 | <=0.25 |
| 20-47-150 | Pork meat | non-ESBL | 2   | 4   | <=8  | <=0.015 | <=1 | <=0.25 |
| 20-47-151 | Pork meat | ESBL     | >64 | 4   | <=8  | <=0.015 | <=1 | >4     |
| 20-47-152 | Pork meat | non-ESBL | >64 | 8   | >128 | <=0.015 | <=1 | <=0.25 |
| 20-47-153 | Pork meat | non-ESBL | >64 | 8   | <=8  | <=0.015 | <=1 | <=0.25 |
| 20-47-154 | Pork meat | non-ESBL | 4   | 4   | <=8  | <=0.015 | <=1 | <=0.25 |
| 20-47-155 | Pork meat | non-ESBL | 4   | 4   | <=8  | <=0.015 | <=1 | <=0.25 |
| 20-47-156 | Pork meat | non-ESBL | <=1 | 8   | <=8  | 0.25    | <=1 | <=0.25 |
| 20-47-157 | Pork meat | ESBL     | >64 | 8   | <=8  | >8      | <=1 | >4     |
| 20-47-158 | Pork meat | non-ESBL | 4   | 16  | 16   | 0.03    | <=1 | <=0.25 |
| 20-47-159 | Pork meat | non-ESBL | 4   | 16  | <=8  | <=0.015 | <=1 | <=0.25 |
| 20-47-160 | Pork meat | non-ESBL | 4   | 8   | <=8  | <=0.015 | <=1 | <=0.25 |
| 20-47-161 | Pork meat | ESBL     | >64 | 8   | <=8  | <=0.015 | <=1 | >4     |
| 20-47-162 | Pork meat | ESBL     | >64 | 4   | <=8  | <=0.015 | <=1 | >4     |
| 20-47-163 | Pork meat | non-ESBL | 2   | 8   | <=8  | <=0.015 | <=1 | <=0.25 |
| 20-47-164 | Pork meat | ESBL     | >64 | 8   | <=8  | <=0.015 | <=1 | >4     |
| 20-47-165 | Pork meat | ESBL     | >64 | 8   | <=8  | <=0.015 | <=1 | >4     |
| 20-47-166 | Pork meat | ESBL     | >64 | 8   | 16   | >8      | <=1 | >4     |
| 20-47-167 | Pork meat | non-ESBL | >64 | 8   | 64   | <=0.015 | <=1 | <=0.25 |
| 20-47-168 | Pork meat | non-ESBL | >64 | 4   | <=8  | <=0.015 | 4   | <=0.25 |
| 20-47-169 | Pork meat | ESBL     | >64 | >64 | <=8  | <=0.015 | <=1 | >4     |
| 20-47-170 | Pork meat | ESBL     | >64 | 16  | <=8  | <=0.015 | <=1 | >4     |
| 20-47-171 | Pork meat | ESBL     | >64 | 4   | <=8  | 0.25    | <=1 | >4     |
| 20-47-173 | Pork meat | ESBL     | >64 | 8   | <=8  | <=0.015 | <=1 | >4     |
| 20-47-174 | Pork meat | ESBL     | >64 | 32  | <=8  | 8       | <=1 | >4     |
| 20-47-175 | Pork meat | ESBL     | >64 | 4   | <=8  | 0.03    | <=1 | >4     |
| 20-47-176 | Pork meat | ESBL     | >64 | 8   | <=8  | <=0.015 | <=1 | >4     |
| 20-47-177 | Pork meat | ESBL     | >64 | 8   | <=8  | <=0.015 | <=1 | >4     |
| 20-47-178 | Pork meat | ESBL     | >64 | 64  | <=8  | >8      | <=1 | >4     |
| 20-47-179 | Pork meat | ESBL     | >64 | 8   | <=8  | <=0.015 | <=1 | >4     |
| 20-47-180 | Pork meat | ESBL     | >64 | 4   | <=8  | <=0.015 | <=1 | >4     |
| 20-47-181 | Pork meat | non-ESBL | 2   | 4   | <=8  | <=0.015 | <=1 | <=0.25 |
| 20-47-182 | Pork meat | non-ESBL | 4   | 8   | 32   | <=0.015 | <=1 | <=0.25 |
| 20-47-121 | Pork meat | ESBL     | >64 | 8   | <=8  | <=0.015 | <=1 | >4     |
| 20-47-172 | Pork meat | ESBL     | >64 | 8   | <=8  | <=0.015 | <=1 | 2      |
| 21-47-2   | Inpatient | ESBL     | >32 | 4   | <=8  | <=0.015 | <=1 | >4     |
| 21-47-3   | Inpatient | ESBL     | >32 | 32  | <=8  | 1       | <=1 | >4     |
| 21-47-4   | Inpatient | ESBL     | >32 | >64 | <=8  | <=0.015 | <=1 | >4     |
| 21-47-6   | Inpatient | ESBL     | >32 | 4   | <=8  | <=0.015 | <=1 | >4     |
| 21-47-7   | Inpatient | ESBL     | >32 | 8   | <=8  | <=0.015 | <=1 | >4     |
| 21-47-8   | Inpatient | ESBL     | >32 | 4   | <=8  | <=0.015 | <=1 | >4     |

|          |           |          |     |     |     |         |     |        |
|----------|-----------|----------|-----|-----|-----|---------|-----|--------|
| 21-47-9  | Inpatient | ESBL     | >32 | 4   | <=8 | 4       | <=1 | >4     |
| 21-47-10 | Inpatient | ESBL     | >32 | <=2 | >64 | <=0.015 | <=1 | >4     |
| 21-47-11 | Inpatient | ESBL     | >32 | 8   | >64 | >8      | <=1 | >4     |
| 21-47-12 | Inpatient | ESBL     | >32 | 8   | <=8 | <=0.015 | <=1 | >4     |
| 21-47-13 | Inpatient | ESBL     | >32 | 32  | <=8 | >8      | <=1 | >4     |
| 21-47-14 | Inpatient | ESBL     | >32 | >64 | <=8 | 0.12    | <=1 | >4     |
| 21-47-15 | Inpatient | ESBL     | >32 | 8   | <=8 | <=0.015 | <=1 | >4     |
| 21-47-16 | Inpatient | ESBL     | >32 | 4   | <=8 | 0.25    | <=1 | >4     |
| 21-47-17 | Inpatient | ESBL     | >32 | 64  | >64 | >8      | <=1 | >4     |
| 21-47-19 | Inpatient | ESBL     | >32 | 4   | 16  | >8      | <=1 | >4     |
| 21-47-20 | Inpatient | ESBL     | >32 | 32  | <=8 | >8      | <=1 | >4     |
| 21-47-22 | Inpatient | ESBL     | >32 | 32  | <=8 | >8      | 2   | >4     |
| 21-47-23 | Inpatient | ESBL     | >32 | >64 | 16  | 0.25    | <=1 | >4     |
| 21-47-25 | Inpatient | ESBL     | >32 | 4   | <=8 | 0.25    | <=1 | >4     |
| 21-47-26 | Inpatient | ESBL     | >32 | 32  | <=8 | >8      | <=1 | >4     |
| 21-47-27 | Inpatient | ESBL     | >32 | 32  | <=8 | >8      | <=1 | >4     |
| 21-47-28 | Inpatient | ESBL     | >32 | 16  | 32  | 1       | <=1 | >4     |
| 21-47-29 | Inpatient | ESBL     | >32 | 4   | >64 | >8      | <=1 | >4     |
| 21-47-30 | Inpatient | ESBL     | >32 | 8   | 16  | >8      | <=1 | >4     |
| 21-47-31 | Inpatient | ESBL     | >32 | 32  | 64  | >8      | <=1 | >4     |
| 21-47-32 | Inpatient | ESBL     | >32 | 32  | <=8 | >8      | <=1 | >4     |
| 21-47-33 | Inpatient | non-ESBL | 4   | 32  | <=8 | >8      | <=1 | <=0.25 |
| 21-47-34 | Inpatient | ESBL     | >32 | 8   | <=8 | >8      | <=1 | >4     |
| 21-47-35 | Inpatient | ESBL     | >32 | 64  | <=8 | >8      | <=1 | >4     |
| 21-47-37 | Inpatient | ESBL     | >32 | >64 | <=8 | 0.5     | <=1 | >4     |
| 21-47-39 | Inpatient | ESBL     | >32 | 8   | <=8 | >8      | <=1 | >4     |
| 21-47-40 | Inpatient | ESBL     | >32 | <=2 | <=8 | 4       | <=1 | >4     |
| 21-47-41 | Inpatient | ESBL     | >32 | 8   | <=8 | >8      | <=1 | >4     |
| 21-47-42 | Inpatient | ESBL     | >32 | 4   | >64 | >8      | <=1 | 1      |
| 21-47-43 | Inpatient | ESBL     | >32 | 8   | >64 | >8      | <=1 | >4     |
| 21-47-44 | Inpatient | ESBL     | >32 | 4   | <=8 | >8      | <=1 | >4     |
| 21-47-45 | Inpatient | ESBL     | >32 | 8   | <=8 | >8      | <=1 | >4     |
| 21-47-46 | Inpatient | ESBL     | >32 | 4   | <=8 | >8      | <=1 | >4     |
| 21-47-47 | Inpatient | ESBL     | >32 | 4   | <=8 | >8      | <=1 | >4     |
| 21-47-48 | Inpatient | ESBL     | >32 | 4   | <=8 | >8      | <=1 | >4     |
| 21-47-49 | Inpatient | ESBL     | >32 | 32  | <=8 | 1       | <=1 | >4     |
| 21-47-50 | Inpatient | ESBL     | >32 | 16  | 32  | 4       | <=1 | >4     |
| 21-47-51 | Inpatient | ESBL     | >32 | >64 | >64 | 8       | <=1 | 4      |
| 21-47-52 | Inpatient | ESBL     | >32 | 32  | <=8 | >8      | <=1 | >4     |
| 21-47-53 | Inpatient | ESBL     | >32 | 64  | <=8 | >8      | <=1 | >4     |
| 21-47-55 | Inpatient | ESBL     | >32 | 16  | <=8 | >8      | <=1 | >4     |
| 21-47-80 | Inpatient | ESBL     | >32 | 64  | 16  | >8      | <=1 | >4     |
| 21-47-81 | Inpatient | ESBL     | >32 | >64 | <=8 | >8      | <=1 | >4     |
| 21-47-82 | Inpatient | ESBL     | >32 | 64  | 16  | >8      | <=1 | >4     |
| 21-47-83 | Inpatient | ESBL     | >32 | 16  | 32  | 0.5     | <=1 | >4     |
| 21-47-84 | Inpatient | ESBL     | >32 | 16  | 16  | 0.06    | <=1 | >4     |
| 21-47-85 | Inpatient | ESBL     | >32 | 8   | 64  | >8      | <=1 | >4     |
| 21-47-86 | Inpatient | ESBL     | >32 | 4   | <=8 | >8      | <=1 | >4     |
| 21-47-87 | Inpatient | ESBL     | >32 | 64  | <=8 | >8      | <=1 | >4     |
| 21-47-88 | Inpatient | ESBL     | >32 | 8   | 16  | >8      | <=1 | >4     |
| 21-47-89 | Inpatient | ESBL     | >32 | 4   | >64 | >8      | <=1 | >4     |

|           |           |          |     |    |     |         |     |        |
|-----------|-----------|----------|-----|----|-----|---------|-----|--------|
| 21-47-90  | Inpatient | ESBL     | >32 | 8  | <=8 | 8       | <=1 | >4     |
| 21-47-91  | Inpatient | ESBL     | >32 | 4  | <=8 | >8      | <=1 | >4     |
| 21-47-92  | Inpatient | ESBL     | >32 | 64 | <=8 | 0.06    | <=1 | >4     |
| 21-47-93  | Inpatient | ESBL     | >32 | 4  | <=8 | 1       | 2   | >4     |
| 21-47-94  | Inpatient | ESBL     | >32 | 8  | <=8 | <=0.015 | <=1 | >4     |
| 21-47-95  | Inpatient | ESBL     | >32 | 8  | <=8 | 4       | <=1 | >4     |
| 21-47-96  | Inpatient | ESBL     | >32 | 8  | 16  | >8      | <=1 | >4     |
| 21-47-97  | Inpatient | ESBL     | >32 | 64 | <=8 | >8      | <=1 | >4     |
| 21-47-98  | Inpatient | ESBL     | >32 | 4  | <=8 | >8      | <=1 | >4     |
| 21-47-99  | Inpatient | ESBL     | >32 | 8  | >64 | 8       | <=1 | >4     |
| 21-47-100 | Inpatient | ESBL     | >32 | 8  | >64 | 8       | <=1 | >4     |
| 21-47-101 | Inpatient | ESBL     | >32 | 4  | 64  | <=0.015 | <=1 | >4     |
| 21-47-102 | Inpatient | non-ESBL | 4   | 8  | <=8 | >8      | <=1 | <=0.25 |
| 21-47-103 | Inpatient | ESBL     | >32 | 8  | <=8 | 2       | <=1 | >4     |
| 21-47-104 | Inpatient | ESBL     | >32 | 4  | <=8 | <=0.015 | <=1 | >4     |
| 21-47-105 | Inpatient | non-ESBL | >32 | 8  | <=8 | 0.03    | <=1 | <=0.25 |
| 21-47-106 | Inpatient | non-ESBL | >32 | 8  | 16  | >8      | <=1 | <=0.25 |
| 21-47-107 | Inpatient | non-ESBL | >32 | 8  | <=8 | <=0.015 | <=1 | <=0.25 |
| 21-47-108 | Inpatient | non-ESBL | >32 | 16 | <=8 | >8      | <=1 | <=0.25 |
| 21-47-109 | Inpatient | non-ESBL | 2   | 4  | <=8 | <=0.015 | <=1 | <=0.25 |
| 21-47-110 | Inpatient | non-ESBL | >32 | 4  | <=8 | 0.25    | <=1 | <=0.25 |
| 21-47-111 | Inpatient | non-ESBL | >32 | 8  | 16  | >8      | <=1 | <=0.25 |
| 21-47-112 | Inpatient | non-ESBL | >32 | 64 | >64 | 0.5     | <=1 | <=0.25 |
| 21-47-113 | Inpatient | non-ESBL | >32 | 8  | >64 | >8      | <=1 | <=0.25 |
| 21-47-114 | Inpatient | non-ESBL | >32 | 64 | >64 | >8      | <=1 | <=0.25 |
| 21-47-115 | Inpatient | non-ESBL | >32 | 4  | <=8 | 0.25    | <=1 | <=0.25 |
| 21-47-116 | Inpatient | non-ESBL | >32 | 32 | <=8 | >8      | <=1 | <=0.25 |
| 21-47-117 | Inpatient | non-ESBL | 4   | 4  | <=8 | 0.03    | <=1 | <=0.25 |
| 21-47-118 | Inpatient | non-ESBL | >32 | 4  | <=8 | 8       | <=1 | <=0.25 |
| 21-47-119 | Inpatient | non-ESBL | >32 | 8  | <=8 | <=0.015 | <=1 | <=0.25 |
| 21-47-121 | Inpatient | non-ESBL | 2   | 4  | <=8 | 0.03    | <=1 | <=0.25 |
| 21-47-122 | Inpatient | non-ESBL | >32 | 4  | <=8 | 0.03    | <=1 | <=0.25 |
| 21-47-123 | Inpatient | non-ESBL | 2   | 4  | <=8 | 0.03    | <=1 | <=0.25 |
| 21-47-124 | Inpatient | non-ESBL | >32 | 4  | <=8 | <=0.015 | <=1 | <=0.25 |
| 21-47-125 | Inpatient | non-ESBL | 4   | 64 | >64 | >8      | <=1 | <=0.25 |
| 21-47-126 | Inpatient | ESBL     | >32 | 8  | 16  | >8      | <=1 | >4     |
| 21-47-127 | Inpatient | non-ESBL | >32 | 4  | <=8 | 0.03    | <=1 | <=0.25 |
| 21-47-128 | Inpatient | non-ESBL | 4   | 8  | <=8 | <=0.015 | <=1 | <=0.25 |
| 21-47-129 | Inpatient | non-ESBL | 4   | 4  | <=8 | 0.25    | 2   | <=0.25 |

AMP=ampicillin; AZI=azithromycin; CHL=chloramphenicol; CIP=ciprofloxacin; COL=colistin; CTA=cefotaxime; GEN=gentamicin; N  
ESBL=extended-spectrum beta-lactamase-producing *E. coli*



| GEN   | MER    | NAL | SME  | CTZ    | TET | TIG    | TRI    |
|-------|--------|-----|------|--------|-----|--------|--------|
| 1     | <=0.03 | 64  | 16   | >8     | >32 | <=0.25 | <=0.25 |
| <=0.5 | <=0.03 | >64 | >512 | 2      | >32 | <=0.25 | >16    |
| 1     | <=0.03 | >64 | <=8  | 8      | >32 | 0.5    | <=0.25 |
| <=0.5 | <=0.03 | >64 | >512 | 4      | <=2 | 0.5    | >16    |
| 1     | <=0.03 | <=4 | >512 | 8      | 32  | 0.5    | >16    |
| >16   | <=0.03 | >64 | <=8  | 4      | >32 | <=0.25 | <=0.25 |
| 1     | <=0.03 | <=4 | >512 | 8      | >32 | 0.5    | >16    |
| 1     | <=0.03 | <=4 | >512 | 2      | 4   | <=0.25 | >16    |
| >16   | <=0.03 | >64 | >512 | 8      | >32 | <=0.25 | >16    |
| 1     | <=0.03 | <=4 | <=8  | 4      | <=2 | <=0.25 | <=0.25 |
| 1     | <=0.03 | <=4 | >512 | 1      | >32 | <=0.25 | >16    |
| 1     | <=0.03 | >64 | >512 | 8      | >32 | 0.5    | >16    |
| 2     | <=0.03 | <=4 | >512 | 4      | <=2 | 0.5    | >16    |
| 1     | <=0.03 | <=4 | >512 | 1      | <=2 | 0.5    | >16    |
| 1     | 0.06   | >64 | >512 | 8      | 4   | 0.5    | >16    |
| <=0.5 | 0.06   | >64 | >512 | 8      | 8   | 0.5    | >16    |
| 1     | <=0.03 | <=4 | 16   | <=0.25 | >32 | <=0.25 | 0.5    |
| <=0.5 | <=0.03 | <=4 | <=8  | <=0.25 | <=2 | 0.5    | <=0.25 |
| >16   | <=0.03 | <=4 | >512 | <=0.25 | >32 | 0.5    | >16    |
| 2     | <=0.03 | <=4 | <=8  | <=0.25 | <=2 | 0.5    | <=0.25 |
| >16   | <=0.03 | <=4 | <=8  | <=0.25 | <=2 | 0.5    | <=0.25 |
| 1     | <=0.03 | <=4 | <=8  | <=0.25 | <=2 | 0.5    | <=0.25 |
| <=0.5 | <=0.03 | <=4 | <=8  | <=0.25 | <=2 | <=0.25 | <=0.25 |
| 1     | <=0.03 | <=4 | <=8  | <=0.25 | <=2 | <=0.25 | <=0.25 |
| 1     | <=0.03 | <=4 | <=8  | <=0.25 | <=2 | <=0.25 | <=0.25 |
| 1     | <=0.03 | <=4 | <=8  | <=0.25 | <=2 | <=0.25 | <=0.25 |
| <=0.5 | <=0.03 | <=4 | <=8  | <=0.25 | <=2 | <=0.25 | <=0.25 |
| 1     | <=0.03 | <=4 | >512 | <=0.25 | <=2 | <=0.25 | >16    |
| 1     | <=0.03 | <=4 | <=8  | <=0.25 | <=2 | <=0.25 | <=0.25 |
| 1     | <=0.03 | >64 | <=8  | 8      | <=2 | <=0.25 | <=0.25 |
| 1     | <=0.03 | <=4 | >512 | 4      | <=2 | <=0.25 | >16    |
| 1     | <=0.03 | <=4 | >512 | 1      | >32 | 0.5    | >16    |
| 1     | <=0.03 | >64 | <=8  | 2      | >32 | <=0.25 | >16    |
| 4     | <=0.03 | <=4 | >512 | 2      | <=2 | <=0.25 | >16    |
| 1     | <=0.03 | >64 | >512 | 8      | >32 | <=0.25 | >16    |
| 1     | <=0.03 | <=4 | <=8  | <=0.25 | <=2 | <=0.25 | <=0.25 |
| <=0.5 | <=0.03 | <=4 | <=8  | <=0.25 | <=2 | <=0.25 | <=0.25 |
| 1     | <=0.03 | 64  | >512 | <=0.25 | <=2 | <=0.25 | >16    |
| 2     | <=0.03 | >64 | >512 | <=0.25 | <=2 | <=0.25 | >16    |
| <=0.5 | <=0.03 | <=4 | <=8  | <=0.25 | <=2 | <=0.25 | <=0.25 |
| 1     | <=0.03 | <=4 | <=8  | <=0.25 | >32 | <=0.25 | <=0.25 |
| 1     | <=0.03 | <=4 | <=8  | <=0.25 | <=2 | <=0.25 | <=0.25 |
| 1     | <=0.03 | <=4 | <=8  | <=0.25 | 4   | <=0.25 | <=0.25 |
| 1     | <=0.03 | <=4 | >512 | <=0.25 | >32 | <=0.25 | >16    |
| >16   | <=0.03 | 64  | >512 | <=0.25 | >32 | <=0.25 | >16    |
| <=0.5 | <=0.03 | <=4 | <=8  | <=0.25 | <=2 | <=0.25 | <=0.25 |
| 2     | <=0.03 | 64  | <=8  | <=0.25 | <=2 | <=0.25 | <=0.25 |
| 1     | <=0.03 | <=4 | <=8  | <=0.25 | <=2 | <=0.25 | <=0.25 |

|       |        |     |      |        |     |        |        |
|-------|--------|-----|------|--------|-----|--------|--------|
| 1     | <=0.03 | <=4 | <=8  | <=0.25 | <=2 | <=0.25 | <=0.25 |
| 2     | <=0.03 | <=4 | <=8  | <=0.25 | <=2 | <=0.25 | <=0.25 |
| >16   | 0.06   | >64 | >512 | 8      | 4   | <=0.25 | >16    |
| 1     | <=0.03 | >64 | >512 | 2      | >32 | <=0.25 | >16    |
| 1     | <=0.03 | >64 | >512 | 4      | >32 | <=0.25 | >16    |
| 16    | <=0.03 | >64 | >512 | 1      | >32 | <=0.25 | >16    |
| <=0.5 | <=0.03 | >64 | >512 | 2      | >32 | <=0.25 | >16    |
| <=0.5 | <=0.03 | <=4 | >512 | 4      | <=2 | <=0.25 | >16    |
| <=0.5 | <=0.03 | <=4 | >512 | 2      | 4   | <=0.25 | >16    |
| 1     | <=0.03 | <=4 | >512 | 2      | 4   | <=0.25 | >16    |
| 1     | <=0.03 | >64 | <=8  | <=0.25 | <=2 | <=0.25 | <=0.25 |
| 1     | -      | >64 | >512 | >8     | >32 | <=0.25 | >16    |
| 1     | 4      | >64 | >512 | >8     | >32 | <=0.25 | >16    |
| 1     | <=0.03 | >64 | <=8  | >8     | 4   | <=0.25 | <=0.25 |
| 1     | <=0.03 | >64 | >512 | 8      | >32 | <=0.25 | >16    |
| 1     | <=0.03 | >64 | >512 | 4      | >32 | <=0.25 | >16    |
| <=0.5 | <=0.03 | >64 | >512 | 2      | <=2 | 0.5    | >16    |
| 1     | <=0.03 | <=4 | >512 | 1      | >32 | <=0.25 | >16    |
| 1     | <=0.03 | >64 | >512 | 2      | >32 | <=0.25 | >16    |
| 1     | <=0.03 | <=4 | >512 | 2      | >32 | <=0.25 | >16    |
| 1     | <=0.03 | >64 | >512 | 4      | >32 | <=0.25 | >16    |
| 1     | <=0.03 | >64 | >512 | 4      | >32 | <=0.25 | >16    |
| 1     | <=0.03 | <=4 | >512 | 4      | <=2 | <=0.25 | >16    |
| 1     | <=0.03 | <=4 | <=8  | 2      | <=2 | <=0.25 | <=0.25 |
| 16    | <=0.03 | >64 | >512 | 4      | >32 | <=0.25 | >16    |
| 1     | <=0.03 | >64 | >512 | 2      | >32 | <=0.25 | >16    |
| <=0.5 | <=0.03 | 8   | <=8  | >8     | <=2 | <=0.25 | <=0.25 |
| 1     | <=0.03 | <=4 | >512 | 2      | <=2 | <=0.25 | >16    |
| >16   | <=0.03 | >64 | >512 | 4      | <=2 | <=0.25 | >16    |
| 1     | <=0.03 | <=4 | <=8  | <=0.25 | <=2 | <=0.25 | <=0.25 |
| 1     | <=0.03 | <=4 | <=8  | <=0.25 | <=2 | <=0.25 | <=0.25 |
| <=0.5 | <=0.03 | <=4 | <=8  | <=0.25 | <=2 | <=0.25 | <=0.25 |
| <=0.5 | <=0.03 | 8   | >512 | <=0.25 | <=2 | <=0.25 | >16    |
| 1     | <=0.03 | >64 | <=8  | <=0.25 | <=2 | <=0.25 | <=0.25 |
| 1     | <=0.03 | <=4 | >512 | <=0.25 | >32 | 0.5    | >16    |
| 1     | <=0.03 | <=4 | <=8  | <=0.25 | 4   | <=0.25 | <=0.25 |
| 2     | <=0.03 | <=4 | <=8  | <=0.25 | <=2 | <=0.25 | <=0.25 |
| 1     | <=0.03 | <=4 | <=8  | <=0.25 | <=2 | <=0.25 | <=0.25 |
| 2     | <=0.03 | <=4 | <=8  | <=0.25 | <=2 | <=0.25 | <=0.25 |
| <=0.5 | <=0.03 | <=4 | >512 | <=0.25 | 32  | <=0.25 | <=0.25 |
| 1     | <=0.03 | <=4 | >512 | <=0.25 | >32 | <=0.25 | >16    |
| 1     | <=0.03 | <=4 | <=8  | <=0.25 | >32 | <=0.25 | <=0.25 |
| 1     | <=0.03 | <=4 | <=8  | <=0.25 | >32 | <=0.25 | <=0.25 |
| 1     | <=0.03 | <=4 | <=8  | <=0.25 | >32 | <=0.25 | <=0.25 |
| <=0.5 | <=0.03 | <=4 | <=8  | <=0.25 | 4   | <=0.25 | <=0.25 |
| <=0.5 | <=0.03 | >64 | >512 | >8     | 32  | <=0.25 | >16    |
| 1     | <=0.03 | >64 | >512 | 8      | >32 | <=0.25 | >16    |
| <=0.5 | <=0.03 | >64 | >512 | 8      | >32 | <=0.25 | >16    |
| >16   | 8      | >64 | >512 | >8     | >32 | <=0.25 | >16    |
| <=0.5 | 0.06   | <=4 | >512 | 2      | >32 | <=0.25 | >16    |
| >16   | <=0.03 | <=4 | >512 | -      | >32 | <=0.25 | >16    |

|       |        |     |       |        |     |        |        |
|-------|--------|-----|-------|--------|-----|--------|--------|
| >16   | <=0.03 | <=4 | >512  | -      | >32 | <=0.25 | >16    |
| 1     | <=0.03 | <=4 | <=8   | <=0.25 | <=2 | <=0.25 | 0.5    |
| <=0.5 | <=0.03 | <=4 | <=8   | 0.5    | 4   | <=0.25 | <=0.25 |
| 1     | <=0.03 | >64 | >512  | 8      | >32 | 0.5    | >16    |
| <=0.5 | <=0.03 | >64 | >512  | >8     | >32 | 0.5    | >16    |
| 1     | <=0.03 | 16  | 16    | 8      | 8   | <=0.25 | <=0.25 |
| 1     | <=0.03 | <=4 | 16    | 8      | <=2 | <=0.25 | 0.5    |
| 1     | <=0.03 | <=4 | >512  | 4      | <=2 | <=0.25 | >16    |
| 1     | <=0.03 | 8   | <=8   | 2      | <=2 | <=0.25 | <=0.25 |
| <=0.5 | <=0.03 | <=4 | 16    | 2      | 4   | <=0.25 | <=0.25 |
| 1     | <=0.03 | 16  | <=8   | 8      | 4   | <=0.25 | <=0.25 |
| 1     | <=0.03 | <=4 | <=8   | 2      | <=2 | <=0.25 | <=0.25 |
| 1     | <=0.03 | <=4 | >512  | 4      | >32 | 0.5    | <=0.25 |
| 1     | <=0.03 | <=4 | <=8   | 2      | <=2 | <=0.25 | <=0.25 |
| <=0.5 | <=0.03 | <=4 | >512  | 2      | >32 | <=0.25 | >16    |
| 2     | <=0.03 | 8   | >512  | 2      | >32 | <=0.25 | >16    |
| 1     | <=0.03 | <=4 | <=8   | 1      | >32 | <=0.25 | 0.5    |
| 1     | <=0.03 | >64 | <=8   | 2      | <=2 | <=0.25 | >16    |
| 2     | <=0.03 | >64 | >512  | 8      | >32 | 0.5    | >16    |
| 1     | <=0.03 | >64 | >512  | 8      | >32 | 0.5    | >16    |
| 2     | <=0.03 | >64 | >512  | 4      | >32 | <=0.25 | >16    |
| 1     | <=0.03 | >64 | >512  | 4      | >32 | <=0.25 | >16    |
| 1     | <=0.03 | >64 | >512  | 2      | >32 | <=0.25 | >16    |
| 1     | <=0.03 | >64 | >512  | 2      | <=2 | <=0.25 | >16    |
| 4     | <=0.03 | <=4 | >512  | 2      | 4   | 0.5    | >16    |
| 1     | <=0.03 | <=4 | 16    | 2      | >32 | 0.5    | >16    |
| 1     | <=0.03 | <=4 | >512  | 8      | >32 | 0.5    | >16    |
| 1     | <=0.03 | <=4 | >512  | 8      | >32 | <=0.25 | >16    |
| 1     | <=0.03 | <=4 | >512  | 1      | >32 | 0.5    | >16    |
| <=0.5 | <=0.03 | <=4 | >512  | 2      | >32 | 0.5    | >16    |
| <=0.5 | <=0.03 | <=4 | >512  | 4      | >32 | <=0.25 | >16    |
| <=0.5 | <=0.03 | <=4 | >512  | 2      | <=2 | 0.5    | <=0.25 |
| 1     | <=0.03 | <=4 | <=8   | 2      | >32 | <=0.25 | <=0.25 |
| <=0.5 | <=0.03 | <=4 | <=8   | 2      | >32 | <=0.25 | <=0.25 |
| <=0.5 | <=0.03 | <=4 | >512  | 2      | <=2 | <=0.25 | <=0.25 |
| <=0.5 | <=0.03 | <=4 | <=8   | 2      | >32 | <=0.25 | <=0.25 |
| 1     | <=0.03 | <=4 | <=8   | 8      | <=2 | <=0.25 | <=0.25 |
| 1     | <=0.03 | <=4 | >512  | 2      | >32 | 0.5    | >16    |
| 1     | <=0.03 | <=4 | >512  | 2      | <=2 | <=0.25 | <=0.25 |
| 1     | <=0.03 | <=4 | <=8   | 2      | <=2 | 0.5    | <=0.25 |
| 1     | <=0.03 | <=4 | >512  | 2      | >32 | 0.5    | >16    |
| 2     | <=0.03 | <=4 | >512  | 4      | >32 | 1      | >16    |
| 1     | <=0.03 | <=4 | >512  | 4      | >32 | 0.5    | >16    |
| 1     | <=0.03 | <=4 | >512  | 2      | >32 | 0.5    | >16    |
| <=0.5 | <=0.03 | <=4 | >512  | 1      | >32 | 0.5    | >16    |
| 1     | <=0.03 | <=4 | <=8   | 1      | <=2 | 0.5    | <=0.25 |
| <=0.5 | <=0.03 | <=4 | >512  | <=0.25 | <=2 | <=0.25 | <=0.25 |
| <=0.5 | <=0.03 | 128 | 16    | <=0.5  | <=2 | <=0.25 | 0.5    |
| <=0.5 | <=0.03 | 16  | >1024 | <=0.5  | <=2 | <=0.25 | 1      |
| >32   | <=0.03 | <=4 | >1024 | <=0.5  | >64 | <=0.25 | >32    |
| 1     | <=0.03 | 8   | <=8   | <=0.5  | >64 | <=0.25 | <=0.25 |

|       |        |      |       |        |     |        |        |
|-------|--------|------|-------|--------|-----|--------|--------|
| 1     | <=0.03 | <=4  | 16    | <=0.5  | 64  | <=0.25 | <=0.25 |
| 1     | <=0.03 | <=4  | 16    | <=0.5  | <=2 | <=0.25 | 0.5    |
| <=0.5 | <=0.03 | <=4  | 16    | <=0.5  | <=2 | <=0.25 | 0.5    |
| <=0.5 | <=0.03 | <=4  | <=8   | <=0.5  | <=2 | <=0.25 | 0.5    |
| 1     | <=0.03 | <=4  | 16    | <=0.5  | <=2 | <=0.25 | <=0.25 |
| <=0.5 | <=0.03 | <=4  | <=8   | <=0.5  | 4   | <=0.25 | 1      |
| <=0.5 | <=0.03 | <=4  | >1024 | <=0.5  | 64  | <=0.25 | >32    |
| 1     | <=0.03 | <=4  | <=8   | <=0.5  | >64 | <=0.25 | <=0.25 |
| <=0.5 | <=0.03 | <=4  | 16    | <=0.5  | <=2 | <=0.25 | <=0.25 |
| 1     | <=0.03 | <=4  | 16    | <=0.5  | <=2 | <=0.25 | <=0.25 |
| <=0.5 | <=0.03 | <=4  | <=8   | <=0.5  | >64 | <=0.25 | <=0.25 |
| >32   | <=0.03 | 16   | >1024 | <=0.5  | >64 | <=0.25 | >32    |
| <=0.5 | <=0.03 | <=4  | 128   | <=0.5  | 64  | <=0.25 | >32    |
| 1     | <=0.03 | <=4  | 16    | <=0.5  | 64  | <=0.25 | 0.5    |
| <=0.5 | <=0.03 | <=4  | >1024 | <=0.5  | 64  | <=0.25 | 0.5    |
| 1     | <=0.03 | <=4  | 32    | <=0.5  | <=2 | <=0.25 | <=0.25 |
| <=0.5 | <=0.03 | <=4  | 16    | <=0.5  | <=2 | <=0.25 | 0.5    |
| 1     | 0.06   | <=4  | 16    | <=0.5  | <=2 | <=0.25 | 0.5    |
| 1     | <=0.03 | <=4  | 32    | <=0.5  | <=2 | <=0.25 | 1      |
| <=0.5 | <=0.03 | <=4  | <=8   | <=0.5  | <=2 | <=0.25 | <=0.25 |
| <=0.5 | <=0.03 | <=4  | <=8   | <=0.5  | <=2 | <=0.25 | <=0.25 |
| <=0.5 | <=0.03 | <=4  | <=8   | <=0.5  | <=2 | <=0.25 | <=0.25 |
| <=0.5 | <=0.03 | <=4  | <=8   | <=0.5  | 64  | <=0.25 | <=0.25 |
| 2     | <=0.03 | <=4  | <=8   | <=0.5  | 4   | <=0.25 | <=0.25 |
| <=0.5 | <=0.03 | 8    | >1024 | <=0.5  | >64 | <=0.25 | >32    |
| <=0.5 | <=0.03 | 8    | <=8   | <=0.5  | <=2 | <=0.25 | <=0.25 |
| <=0.5 | <=0.03 | <=4  | <=8   | <=0.5  | >64 | <=0.25 | <=0.25 |
| <=0.5 | <=0.03 | <=4  | >1024 | <=0.5  | <=2 | <=0.25 | >32    |
| 1     | <=0.03 | <=4  | <=8   | <=0.5  | <=2 | <=0.25 | <=0.25 |
| <=0.5 | <=0.03 | <=4  | >1024 | <=0.5  | 64  | 0.5    | >32    |
| 1     | <=0.03 | <=4  | >1024 | <=0.5  | >64 | 0.5    | <=0.25 |
| 1     | <=0.03 | 8    | <=8   | <=0.5  | 8   | <=0.25 | 0.5    |
| <=0.5 | <=0.03 | >128 | >1024 | <=0.5  | >64 | 0.5    | >32    |
| <=0.5 | <=0.03 | <=4  | >1024 | <=0.5  | <=2 | <=0.25 | >32    |
| <=0.5 | <=0.03 | <=4  | <=8   | <=0.5  | 64  | <=0.25 | <=0.25 |
| 2     | <=0.03 | >128 | >1024 | <=0.5  | 32  | <=0.25 | >32    |
| <=0.5 | <=0.03 | <=4  | <=8   | <=0.5  | <=2 | <=0.25 | <=0.25 |
| 1     | <=0.03 | <=4  | <=8   | <=0.5  | <=2 | <=0.25 | <=0.25 |
| <=0.5 | <=0.03 | <=4  | <=8   | <=0.5  | >64 | <=0.25 | <=0.25 |
| <=0.5 | <=0.03 | <=4  | >1024 | <=0.5  | >64 | <=0.25 | >32    |
| <=0.5 | <=0.03 | <=4  | <=8   | <=0.5  | <=2 | <=0.25 | <=0.25 |
| <=0.5 | <=0.03 | <=4  | <=8   | <=0.5  | <=2 | <=0.25 | <=0.25 |
| <=0.5 | <=0.03 | <=4  | <=8   | <=0.5  | <=2 | <=0.25 | <=0.25 |
| 1     | <=0.03 | <=4  | >512  | <=0.25 | <=2 | <=0.25 | <=0.25 |
| <=0.5 | <=0.03 | <=4  | >512  | 2      | >32 | <=0.25 | >16    |
| <=0.5 | <=0.03 | <=4  | <=8   | >8     | <=2 | <=0.25 | <=0.25 |
| >16   | <=0.03 | <=4  | >512  | 2      | >32 | <=0.25 | <=0.25 |
| 1     | <=0.03 | <=4  | <=8   | <=0.25 | >32 | <=0.25 | 0.5    |
| <=0.5 | <=0.03 | <=4  | 16    | <=0.5  | >64 | <=0.25 | 1      |
| <=0.5 | <=0.03 | <=4  | >1024 | <=0.5  | 64  | <=0.25 | >32    |
| <=0.5 | <=0.03 | <=4  | <=8   | <=0.5  | <=2 | <=0.25 | <=0.25 |

|       |        |      |       |       |     |        |        |
|-------|--------|------|-------|-------|-----|--------|--------|
| >32   | <=0.03 | <=4  | >1024 | <=0.5 | 32  | <=0.25 | >32    |
| 2     | <=0.03 | 64   | >1024 | 1     | >64 | <=0.25 | >32    |
| <=0.5 | 0.06   | <=4  | >1024 | 4     | 4   | <=0.25 | >32    |
| 1     | <=0.03 | <=4  | >1024 | <=0.5 | <=2 | <=0.25 | >32    |
| 32    | <=0.03 | <=4  | >1024 | <=0.5 | >64 | <=0.25 | >32    |
| 1     | <=0.03 | <=4  | 16    | 2     | <=2 | <=0.25 | <=0.25 |
| <=0.5 | <=0.03 | 128  | 16    | 8     | >64 | <=0.25 | <=0.25 |
| <=0.5 | <=0.03 | 16   | >1024 | <=0.5 | 32  | <=0.25 | >32    |
| <=0.5 | <=0.03 | 128  | >1024 | 8     | >64 | <=0.25 | 8      |
| <=0.5 | <=0.03 | <=4  | >1024 | 2     | <=2 | <=0.25 | >32    |
| 1     | <=0.03 | <=4  | >1024 | <=0.5 | >64 | <=0.25 | >32    |
| <=0.5 | <=0.03 | <=4  | >1024 | <=0.5 | 64  | <=0.25 | >32    |
| <=0.5 | <=0.03 | <=4  | 16    | <=0.5 | <=2 | <=0.25 | 0.5    |
| <=0.5 | <=0.03 | <=4  | 16    | <=0.5 | <=2 | <=0.25 | 0.5    |
| 1     | <=0.03 | <=4  | >1024 | <=0.5 | <=2 | <=0.25 | >32    |
| <=0.5 | <=0.03 | <=4  | 16    | <=0.5 | <=2 | <=0.25 | >32    |
| <=0.5 | <=0.03 | <=4  | >1024 | 4     | <=2 | <=0.25 | 1      |
| 1     | <=0.03 | <=4  | >1024 | 2     | <=2 | <=0.25 | >32    |
| <=0.5 | <=0.03 | <=4  | 64    | 2     | <=2 | <=0.25 | <=0.25 |
| 2     | <=0.03 | <=4  | <=8   | <=0.5 | <=2 | <=0.25 | <=0.25 |
| <=0.5 | <=0.03 | <=4  | 32    | <=0.5 | <=2 | <=0.25 | 0.5    |
| <=0.5 | <=0.03 | >128 | >1024 | 2     | >64 | <=0.25 | >32    |
| 2     | <=0.03 | <=4  | 16    | 2     | <=2 | <=0.25 | <=0.25 |
| <=0.5 | <=0.03 | <=4  | 16    | <=0.5 | <=2 | <=0.25 | <=0.25 |
| <=0.5 | <=0.03 | <=4  | >1024 | 2     | <=2 | <=0.25 | >32    |
| >32   | <=0.03 | <=4  | >1024 | <=0.5 | 64  | <=0.25 | >32    |
| <=0.5 | <=0.03 | <=4  | 16    | 2     | <=2 | <=0.25 | <=0.25 |
| 1     | <=0.03 | 8    | 32    | 8     | >64 | <=0.25 | <=0.25 |
| 32    | <=0.03 | >128 | >1024 | >8    | 64  | <=0.25 | >32    |
| 1     | <=0.03 | <=4  | 16    | <=0.5 | 4   | <=0.25 | 1      |
| <=0.5 | <=0.03 | <=4  | 16    | <=0.5 | <=2 | <=0.25 | <=0.25 |
| 1     | 0.06   | <=4  | >1024 | <=0.5 | >64 | <=0.25 | >32    |
| 1     | <=0.03 | <=4  | 16    | <=0.5 | <=2 | <=0.25 | <=0.25 |
| 1     | <=0.03 | <=4  | 16    | 2     | >64 | <=0.25 | <=0.25 |
| <=0.5 | <=0.03 | >128 | >1024 | 8     | >64 | <=0.25 | >32    |
| 2     | <=0.03 | <=4  | 16    | <=0.5 | 4   | <=0.25 | 1      |
| <=0.5 | <=0.03 | <=4  | >1024 | 1     | <=2 | <=0.25 | >32    |
| <=0.5 | <=0.03 | <=4  | 16    | <=0.5 | <=2 | <=0.25 | 0.5    |
| 1     | <=0.03 | <=4  | 16    | <=0.5 | <=2 | <=0.25 | 1      |
| 1     | <=0.03 | <=4  | 16    | <=0.5 | <=2 | <=0.25 | <=0.25 |
| <=0.5 | <=0.03 | >128 | >1024 | <=0.5 | <=2 | <=0.25 | >32    |
| <=0.5 | <=0.03 | <=4  | 16    | <=0.5 | 4   | <=0.25 | 0.5    |
| <=0.5 | <=0.03 | <=4  | >1024 | 2     | <=2 | <=0.25 | >32    |
| <=0.5 | <=0.03 | <=4  | <=8   | <=0.5 | >64 | <=0.25 | <=0.25 |
| <=0.5 | <=0.03 | <=4  | >1024 | <=0.5 | 64  | 0.5    | >32    |
| <=0.5 | <=0.03 | <=4  | >1024 | <=0.5 | >64 | <=0.25 | >32    |
| <=0.5 | <=0.03 | <=4  | <=8   | <=0.5 | 64  | <=0.25 | <=0.25 |
| <=0.5 | <=0.03 | <=4  | >1024 | <=0.5 | <=2 | <=0.25 | >32    |
| <=0.5 | <=0.03 | <=4  | >1024 | 1     | <=2 | <=0.25 | >32    |
| <=0.5 | <=0.03 | <=4  | <=8   | <=0.5 | 4   | 0.5    | <=0.25 |
| <=0.5 | <=0.03 | <=4  | <=8   | <=0.5 | <=2 | <=0.25 | <=0.25 |

|       |        |      |       |       |     |        |        |
|-------|--------|------|-------|-------|-----|--------|--------|
| <=0.5 | <=0.03 | >128 | <=8   | 8     | <=2 | <=0.25 | <=0.25 |
| 2     | <=0.03 | <=4  | 16    | 2     | >64 | <=0.25 | <=0.25 |
| <=0.5 | <=0.03 | <=4  | <=8   | <=0.5 | 4   | <=0.25 | <=0.25 |
| <=0.5 | <=0.03 | <=4  | <=8   | <=0.5 | <=2 | <=0.25 | <=0.25 |
| <=0.5 | <=0.03 | <=4  | <=8   | <=0.5 | <=2 | <=0.25 | <=0.25 |
| <=0.5 | <=0.03 | <=4  | <=8   | <=0.5 | <=2 | <=0.25 | <=0.25 |
| <=0.5 | <=0.03 | <=4  | >1024 | <=0.5 | 64  | <=0.25 | >32    |
| <=0.5 | <=0.03 | <=4  | <=8   | <=0.5 | <=2 | <=0.25 | 0.5    |
| <=0.5 | <=0.03 | <=4  | <=8   | <=0.5 | <=2 | <=0.25 | <=0.25 |
| <=0.5 | <=0.03 | <=4  | >1024 | <=0.5 | 64  | 0.5    | <=0.25 |
| <=0.5 | <=0.03 | <=4  | <=8   | <=0.5 | 64  | <=0.25 | <=0.25 |
| <=0.5 | <=0.03 | <=4  | <=8   | <=0.5 | <=2 | <=0.25 | 0.5    |
| <=0.5 | <=0.03 | <=4  | >1024 | 2     | 64  | <=0.25 | >32    |
| 2     | <=0.03 | <=4  | <=8   | <=0.5 | 64  | <=0.25 | <=0.25 |
| <=0.5 | <=0.03 | <=4  | >1024 | <=0.5 | >64 | <=0.25 | >32    |
| <=0.5 | <=0.03 | <=4  | <=8   | <=0.5 | <=2 | <=0.25 | <=0.25 |
| <=0.5 | <=0.03 | <=4  | <=8   | <=0.5 | <=2 | <=0.25 | <=0.25 |
| <=0.5 | <=0.03 | 128  | >1024 | <=0.5 | >64 | <=0.25 | >32    |
| 1     | <=0.03 | >128 | >1024 | 4     | >64 | <=0.25 | >32    |
| <=0.5 | <=0.03 | 8    | <=8   | <=0.5 | 4   | 0.5    | <=0.25 |
| <=0.5 | <=0.03 | 8    | <=8   | <=0.5 | 4   | <=0.25 | <=0.25 |
| 2     | <=0.03 | <=4  | 16    | <=0.5 | <=2 | <=0.25 | 0.5    |
| <=0.5 | <=0.03 | <=4  | >1024 | 4     | <=2 | <=0.25 | >32    |
| <=0.5 | <=0.03 | <=4  | >1024 | 2     | <=2 | <=0.25 | >32    |
| <=0.5 | <=0.03 | <=4  | <=8   | <=0.5 | <=2 | <=0.25 | 0.5    |
| 1     | <=0.03 | <=4  | >1024 | 4     | <=2 | 0.5    | <=0.25 |
| <=0.5 | <=0.03 | <=4  | >1024 | 1     | 64  | 0.5    | >32    |
| <=0.5 | <=0.03 | >128 | <=8   | >8    | >64 | <=0.25 | 0.5    |
| 1     | <=0.03 | <=4  | >1024 | <=0.5 | >64 | <=0.25 | >32    |
| <=0.5 | <=0.03 | <=4  | <=8   | <=0.5 | >64 | <=0.25 | <=0.25 |
| <=0.5 | <=0.03 | <=4  | >1024 | 1     | <=2 | <=0.25 | >32    |
| 32    | <=0.03 | <=4  | 32    | 2     | <=2 | <=0.25 | <=0.25 |
| <=0.5 | <=0.03 | >128 | >1024 | 2     | 8   | <=0.25 | >32    |
| <=0.5 | <=0.03 | <=4  | >1024 | 1     | 64  | 0.5    | >32    |
| <=0.5 | <=0.03 | >128 | >1024 | 1     | >64 | 0.5    | <=0.25 |
| 2     | <=0.03 | <=4  | >1024 | 2     | <=2 | <=0.25 | >32    |
| 1     | <=0.03 | <=4  | >1024 | 2     | <=2 | <=0.25 | >32    |
| 1     | <=0.03 | <=4  | >1024 | 1     | <=2 | <=0.25 | <=0.25 |
| 32    | <=0.03 | >128 | >1024 | >8    | >64 | <=0.25 | >32    |
| 32    | <=0.03 | <=4  | <=8   | 2     | >64 | <=0.25 | <=0.25 |
| <=0.5 | <=0.03 | <=4  | >1024 | 2     | 64  | <=0.25 | >32    |
| <=0.5 | <=0.03 | <=4  | <=8   | <=0.5 | >64 | 0.5    | <=0.25 |
| 1     | <=0.03 | <=4  | >1024 | <=0.5 | <=2 | 0.5    | >32    |
| <=0.5 | <=0.03 | <=4  | 16    | 2     | >64 | <=0.25 | <=0.25 |
| <=0.5 | <=0.03 | <=4  | <=8   | 8     | >64 | <=0.25 | <=0.25 |
| 1     | <=0.03 | <=4  | 32    | 2     | <=2 | <=0.25 | <=0.25 |
| 1     | <=0.03 | >64  | >512  | >8    | 4   | <=0.25 | >16    |
| <=0.5 | <=0.03 | <=4  | >512  | 2     | >32 | <=0.25 | >16    |
| <=0.5 | <=0.03 | <=4  | >512  | 2     | >32 | <=0.25 | >16    |
| <=0.5 | <=0.03 | <=4  | >512  | 4     | >32 | 0.5    | >16    |
| 2     | <=0.03 | <=4  | >512  | 2     | >32 | <=0.25 | <=0.25 |

|       |        |     |      |     |     |        |        |
|-------|--------|-----|------|-----|-----|--------|--------|
| 1     | <=0.03 | >64 | <=8  | 2   | <=2 | <=0.25 | <=0.25 |
| 1     | <=0.03 | <=4 | >512 | 2   | <=2 | <=0.25 | >16    |
| <=0.5 | <=0.03 | >64 | >512 | 4   | >32 | <=0.25 | >16    |
| 2     | <=0.03 | <=4 | >512 | 2   | <=2 | <=0.25 | >16    |
| 2     | <=0.03 | >64 | >512 | >8  | <=2 | <=0.25 | >16    |
| 1     | <=0.03 | 64  | >512 | 1   | <=2 | <=0.25 | >16    |
| <=0.5 | <=0.03 | <=4 | >512 | 1   | <=2 | <=0.25 | >16    |
| <=0.5 | <=0.03 | >64 | >512 | 2   | >32 | <=0.25 | <=0.25 |
| >16   | <=0.03 | >64 | >512 | >8  | >32 | <=0.25 | >16    |
| 1     | <=0.03 | >64 | <=8  | >8  | 4   | <=0.25 | <=0.25 |
| 2     | <=0.03 | >64 | >512 | >8  | >32 | <=0.25 | >16    |
| 1     | <=0.03 | >64 | >512 | 8   | >32 | <=0.25 | >16    |
| >16   | 1      | 64  | >512 | 2   | 4   | <=0.25 | >16    |
| 4     | 0.5    | >64 | <=8  | 4   | <=2 | <=0.25 | >16    |
| 1     | <=0.03 | >64 | >512 | 8   | >32 | <=0.25 | >16    |
| 4     | <=0.03 | >64 | >512 | 4   | <=2 | <=0.25 | >16    |
| 2     | <=0.03 | 32  | <=8  | 8   | 4   | 0.5    | <=0.25 |
| <=0.5 | <=0.03 | >64 | <=8  | 2   | 4   | <=0.25 | <=0.25 |
| -     | 0.06   | >64 | <=8  | 2   | <=2 | <=0.25 | <=0.25 |
| <=0.5 | >16    | >64 | >512 | >8  | >32 | 0.5    | >16    |
| 1     | <=0.03 | >64 | >512 | >8  | <=2 | <=0.25 | >16    |
| 1     | <=0.03 | >64 | <=8  | 0.5 | >32 | <=0.25 | >16    |
| >16   | <=0.03 | >64 | >512 | 8   | <=2 | <=0.25 | >16    |
| 1     | <=0.03 | >64 | <=8  | 4   | >32 | <=0.25 | >16    |
| 1     | <=0.03 | >64 | >512 | >8  | >32 | <=0.25 | >16    |
| <=0.5 | <=0.03 | >64 | <=8  | 4   | <=2 | <=0.25 | <=0.25 |
| 1     | <=0.03 | >64 | >512 | 4   | <=2 | <=0.25 | <=0.25 |
| 1     | <=0.03 | >64 | <=8  | 4   | >32 | <=0.25 | <=0.25 |
| >16   | <=0.03 | >64 | >512 | 0.5 | >32 | <=0.25 | >16    |
| 2     | <=0.03 | >64 | >512 | 2   | >32 | 0.5    | >16    |
| 1     | <=0.03 | >64 | <=8  | 2   | <=2 | <=0.25 | <=0.25 |
| 16    | <=0.03 | >64 | >512 | 2   | 4   | <=0.25 | >16    |
| 1     | <=0.03 | >64 | <=8  | >8  | >32 | <=0.25 | <=0.25 |
| 2     | <=0.03 | >64 | <=8  | 4   | <=2 | <=0.25 | <=0.25 |
| <=0.5 | <=0.03 | >64 | >512 | >8  | >32 | <=0.25 | >16    |
| 2     | <=0.03 | >64 | <=8  | >8  | >32 | <=0.25 | >16    |
| <=0.5 | <=0.03 | >64 | >512 | >8  | 4   | <=0.25 | >16    |
| <=0.5 | <=0.03 | >64 | >512 | >8  | >32 | <=0.25 | >16    |
| >16   | <=0.03 | >64 | >512 | >8  | >32 | <=0.25 | >16    |
| 1     | <=0.03 | >64 | >512 | >8  | >32 | <=0.25 | >16    |
| 1     | <=0.03 | >64 | >512 | >8  | >32 | <=0.25 | >16    |
| 1     | <=0.03 | >64 | >512 | 2   | >32 | 0.5    | >16    |
| 1     | <=0.03 | >64 | >512 | 4   | >32 | <=0.25 | >16    |
| 2     | <=0.03 | >64 | >512 | 8   | >32 | <=0.25 | >16    |
| 1     | <=0.03 | >64 | 16   | 4   | 4   | <=0.25 | <=0.25 |
| 1     | <=0.03 | 8   | <=8  | 1   | 8   | <=0.25 | 0.5    |
| <=0.5 | <=0.03 | >64 | >512 | 2   | >32 | <=0.25 | >16    |
| 1     | 0.06   | >64 | 64   | >8  | >32 | <=0.25 | 0.5    |
| 1     | <=0.03 | >64 | >512 | 4   | >32 | <=0.25 | >16    |
| 1     | <=0.03 | >64 | >512 | 8   | 4   | <=0.25 | >16    |
| <=0.5 | <=0.03 | >64 | >512 | 4   | >32 | <=0.25 | >16    |

|       |        |     |      |        |     |        |        |
|-------|--------|-----|------|--------|-----|--------|--------|
| <=0.5 | <=0.03 | >64 | >512 | 2      | <=2 | <=0.25 | >16    |
| >16   | <=0.03 | >64 | 32   | >8     | >32 | <=0.25 | 0.5    |
| 1     | <=0.03 | 32  | >512 | >8     | 4   | <=0.25 | >16    |
| 1     | 0.06   | >64 | >512 | 2      | >32 | <=0.25 | >16    |
| 1     | <=0.03 | <=4 | >512 | 4      | >32 | <=0.25 | >16    |
| 1     | <=0.03 | >64 | >512 | 2      | <=2 | <=0.25 | >16    |
| 1     | <=0.03 | >64 | <=8  | 8      | <=2 | <=0.25 | 0.5    |
| 1     | <=0.03 | >64 | >512 | 8      | >32 | <=0.25 | >16    |
| 2     | <=0.03 | >64 | >512 | 2      | >32 | <=0.25 | >16    |
| 2     | <=0.03 | >64 | >512 | >8     | >32 | <=0.25 | >16    |
| 1     | <=0.03 | >64 | >512 | 2      | >32 | <=0.25 | >16    |
| <=0.5 | <=0.03 | <=4 | <=8  | >8     | <=2 | <=0.25 | <=0.25 |
| 2     | <=0.03 | >64 | 16   | <=0.25 | <=2 | <=0.25 | 0.5    |
| <=0.5 | <=0.03 | >64 | >512 | >8     | >32 | <=0.25 | >16    |
| 2     | <=0.03 | <=4 | >512 | 2      | <=2 | <=0.25 | >16    |
| 1     | <=0.03 | <=4 | >512 | <=0.25 | >32 | 0.5    | >16    |
| 1     | <=0.03 | >64 | 16   | <=0.25 | 4   | <=0.25 | <=0.25 |
| 1     | <=0.03 | <=4 | >512 | <=0.25 | >32 | <=0.25 | >16    |
| <=0.5 | <=0.03 | >64 | >512 | <=0.25 | <=2 | <=0.25 | >16    |
| <=0.5 | <=0.03 | <=4 | <=8  | <=0.25 | <=2 | <=0.25 | <=0.25 |
| <=0.5 | <=0.03 | >64 | >512 | <=0.25 | <=2 | <=0.25 | >16    |
| 1     | <=0.03 | >64 | <=8  | 0.5    | <=2 | <=0.25 | <=0.25 |
| 4     | 0.06   | 16  | >512 | 0.5    | >32 | <=0.25 | >16    |
| 1     | <=0.03 | >64 | >512 | <=0.25 | >32 | <=0.25 | >16    |
| 1     | <=0.03 | >64 | >512 | <=0.25 | >32 | <=0.25 | >16    |
| 1     | <=0.03 | >64 | <=8  | 0.5    | >32 | <=0.25 | <=0.25 |
| 1     | <=0.03 | >64 | >512 | <=0.25 | >32 | <=0.25 | >16    |
| 1     | <=0.03 | <=4 | <=8  | <=0.25 | <=2 | <=0.25 | <=0.25 |
| 1     | <=0.03 | >64 | >512 | <=0.25 | >32 | <=0.25 | >16    |
| 1     | <=0.03 | <=4 | >512 | <=0.25 | >32 | <=0.25 | >16    |
| <=0.5 | <=0.03 | <=4 | <=8  | <=0.25 | <=2 | <=0.25 | <=0.25 |
| 2     | <=0.03 | <=4 | >512 | <=0.25 | <=2 | <=0.25 | >16    |
| <=0.5 | <=0.03 | <=4 | <=8  | <=0.25 | <=2 | <=0.25 | <=0.25 |
| 1     | <=0.03 | <=4 | <=8  | -      | <=2 | <=0.25 | <=0.25 |
| 1     | <=0.03 | >64 | <=8  | <=0.25 | <=2 | <=0.25 | >16    |
| >16   | <=0.03 | >64 | >512 | 1      | >32 | <=0.25 | 0.5    |
| 1     | <=0.03 | <=4 | >512 | <=0.25 | 4   | <=0.25 | <=0.25 |
| 2     | <=0.03 | <=4 | 32   | <=0.25 | <=2 | <=0.25 | <=0.25 |
| 1     | <=0.03 | >64 | <=8  | 0.5    | <=2 | <=0.25 | <=0.25 |

1ER=meropenem; NAL=nalidixic acid; SME=sulfamethoxazole; CTZ=ceftazidime; TET=tetracycline; TIG=tigecycline; TRI=trimethoprim
